# Supplementary material
Source: PubMed Central journal article supplement (PMC3494205)

## Supplementary information

### Figure legends

**Figure S1. Up-regulation of NLRP3, AIM2, and RIG-I inflammasome molecules in the NPC Affymetrix microarray database.** The analysis of affymetrix microarray was according to Affymetrix HG U133 plus 2.0 set. Gene-specific probes were used in tumor and adjacent normal tissues.

**Figure S2. Metacore network process analysis of iTRAQ candidates.** The mitotic-process network shown by the Metacore software. The red spots indicate the candidates obtained from our iTRAQ analysis.

**Figure S3. Knockdown of NLRP3, AIM2, RIG-I and EB1 in NPC TW02 cells.** A) Cells were transfected with si-NLRP3 for 48 h, cell extracts were prepared, and RNA was collected for quantitative RT-PCR by specific primers. B, C and D) Cells were transfected with si-AIM2, si-RIG-I and si-EB1 for 48 h, and cell extracts were subjected to Western blot analysis using the indicated antibodies.

**Figure S4. The association of EB1 with AIM2 inflammasome in different time points.** NPC TW02 cells were transfected flag-AIM2 for 48h, then treated with poly (dA:dT). The cell extracts were collected at indicated time points and immunoprecipitated by anti-flag matrix. The indicated proteins were detected by specific antibodies.

**Figure S5. EB1 directly interacts with ASC through the CT domain.** Purified GST, GST-EB1-WT, GST-EB1-CH and GST-EB1-CT fusion proteins were immobilized on glutathione agarose and separately incubated with purified His-ASC fusion proteins for 24 h. The bound proteins were washed and then analyzed by Western blotting with an anti-His antibody. The fold-change numbers were obtained from three independent experiments. The amounts of GST fusion proteins were assessed by Coomassie blue staining.

**Figure S6. Knockdown of the small GTPase, RhoA, and inhibition of microtubule polymerization both decrease AIM2-mediated IL-1 $\beta$  secretion in**

**HK1 cells.** A) Cells were transfected with si-control, si-Rac1, si-RhoA or si-cdc42 for 48 h, treated with poly (dA:dT) for 2 h, and further incubated for 10 h. Media and cell extracts were then collected for ELISA of IL-1 $\beta$  and western blot. B) Cells were pre-treated with nocodazole (2  $\mu$ g/ $\mu$ l) or paclitaxel (5  $\mu$ M) for 2 h, treated with poly (dA:dT) for 2 h, and further incubated for 10 h. Media were collected for ELISA against IL-1 $\beta$ . Symbols: \*,  $P < 0.05$  and \*\*,  $P < 0.01$ . The results are presented as the means  $\pm$  SD of three experiments.

**Figure S7. The effect of knockdown EB1 on AIM2 inflammsome activation in THP-1 cells.** Cells were treated with PMA (2  $\mu$ M) for 6h then treated with LPS (2  $\mu$ g) for 24h. Cells transfected with si-control, si-AIM2 or si-EB1 for 24 h, then treated with poly (dA:dT) for 4 h. Media and cell extracts were collected for IL-1 $\beta$  ELISA and western blot. Symbols: \*,  $P < 0.05$  and \*\*,  $P < 0.01$ . The results are presented as the means  $\pm$  SD of three experiments.

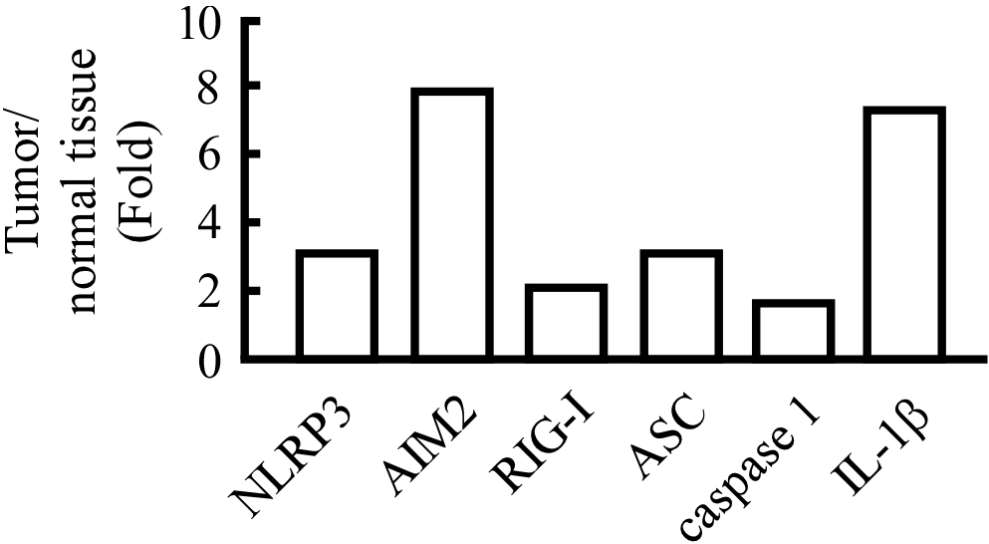

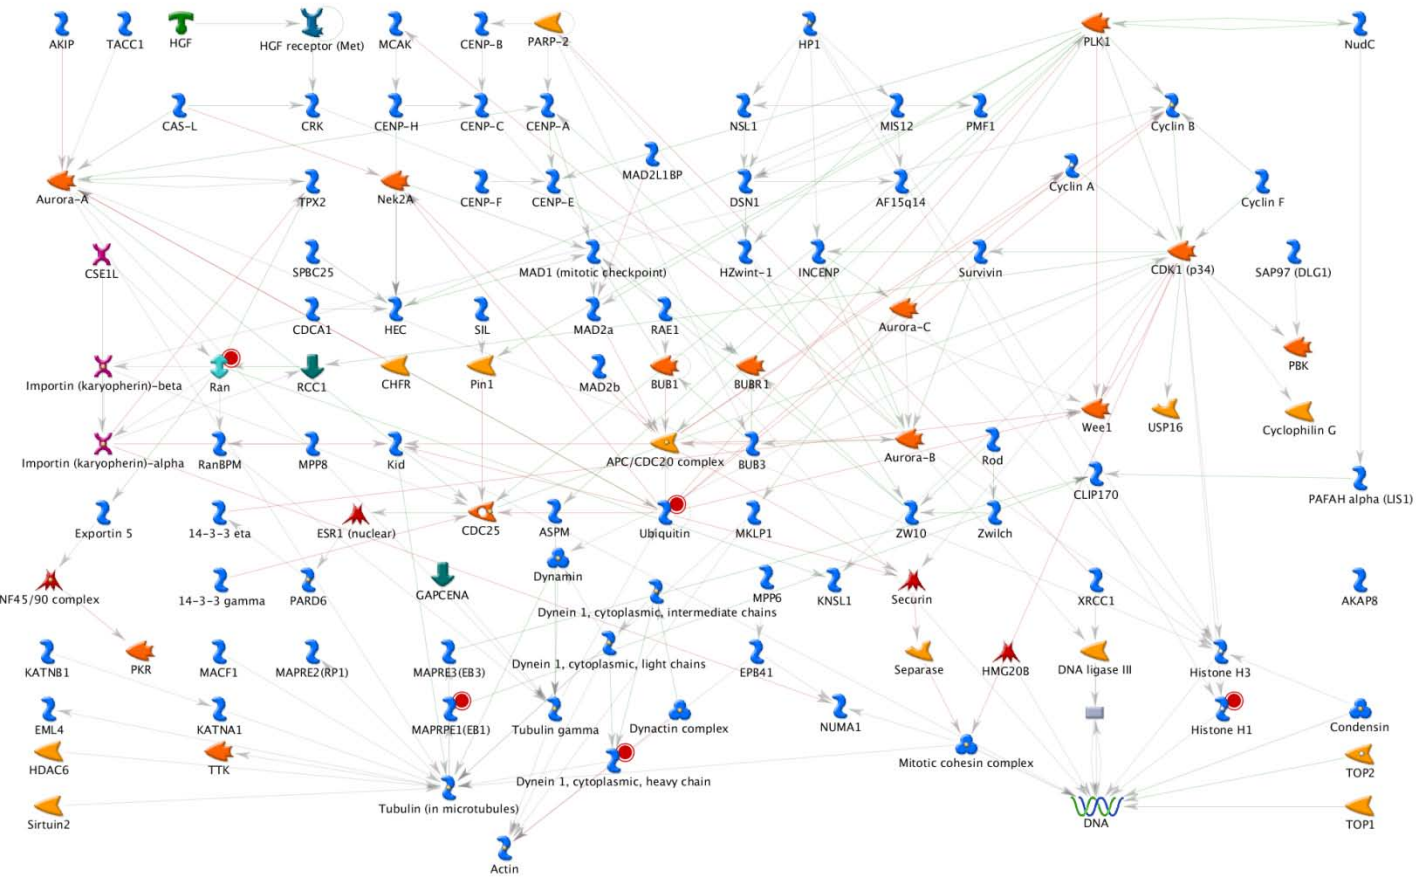

- G protein regulator
- Transcription factor
- Receptor ligand
- Receptor
- Channel
- Enzyme
- Kinase
- Phosphatase
- Protease
- Metalloprotease
- Binding protein
- Transporter
- RAS GTPase

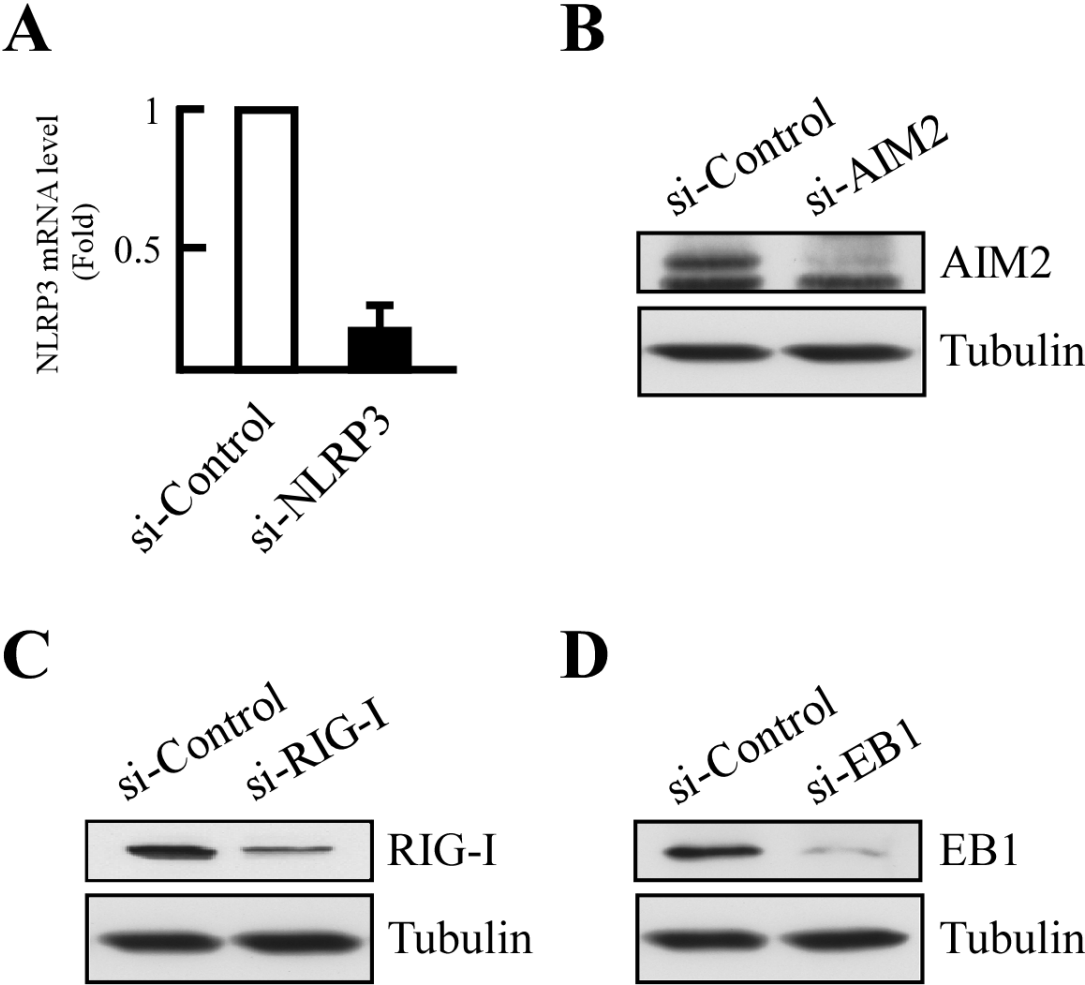

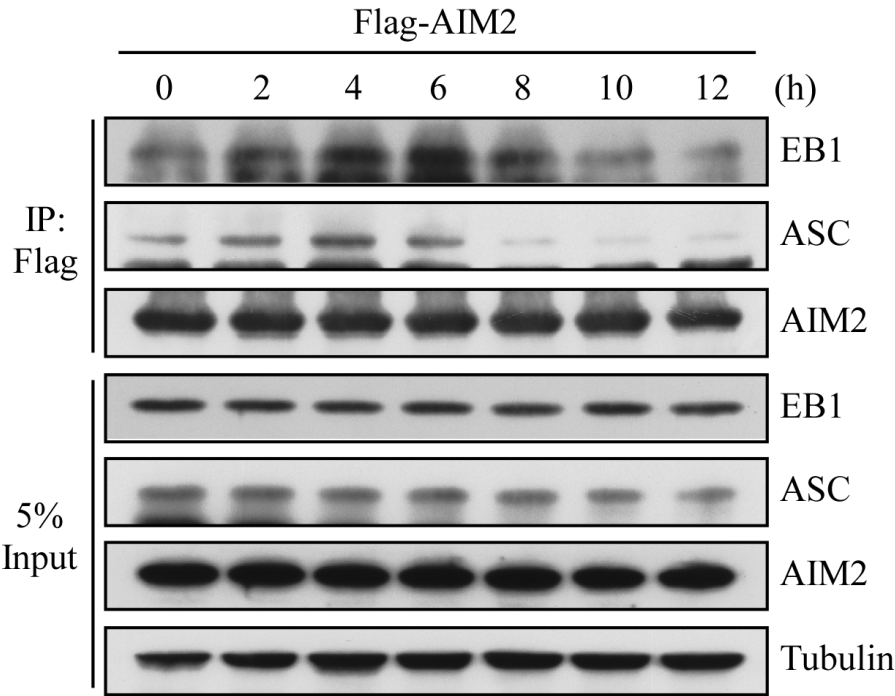

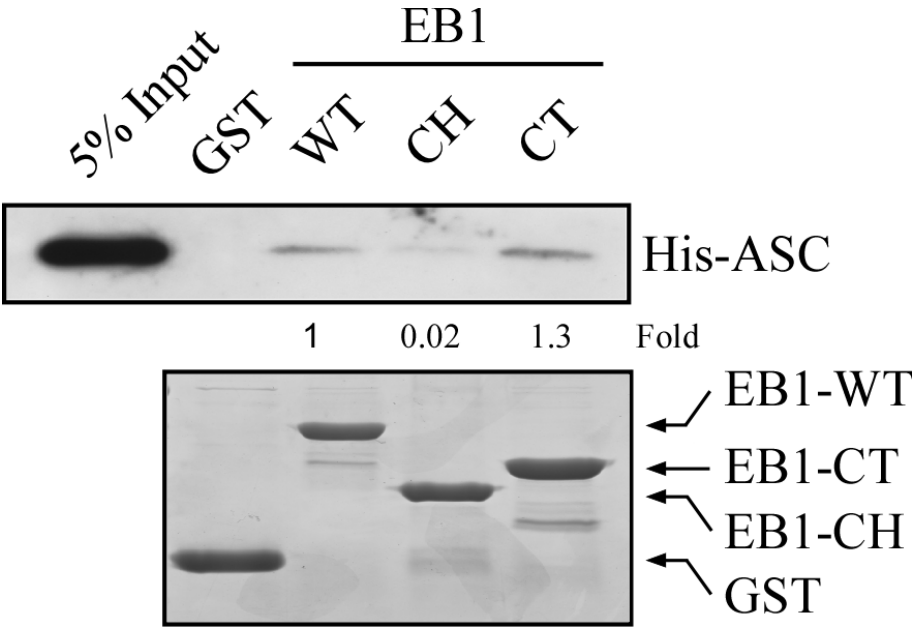

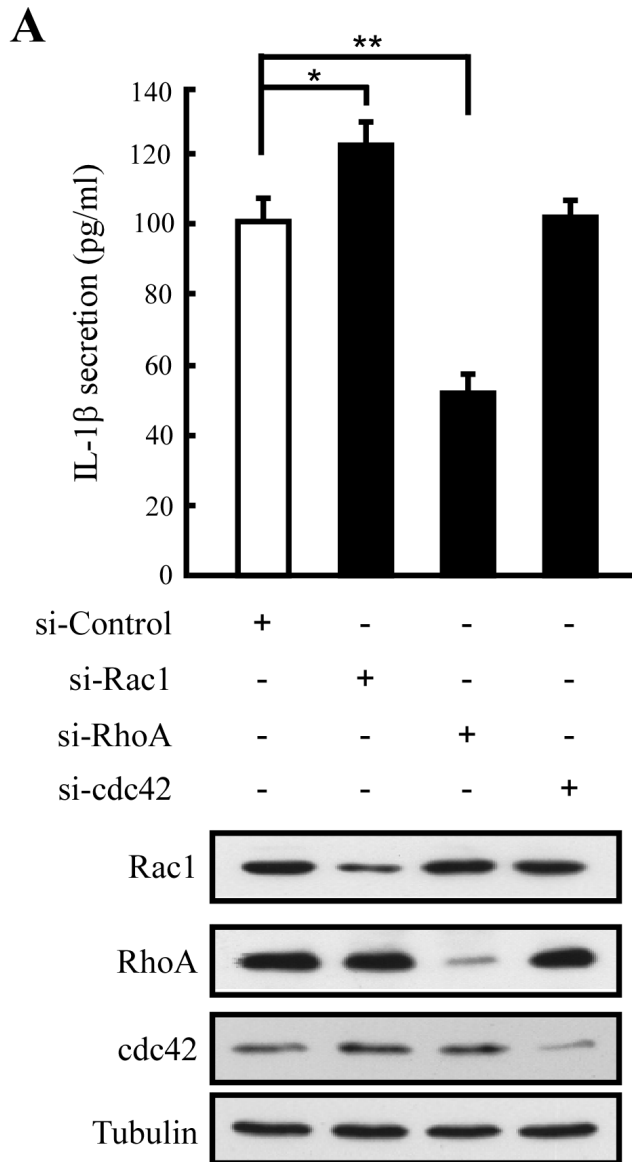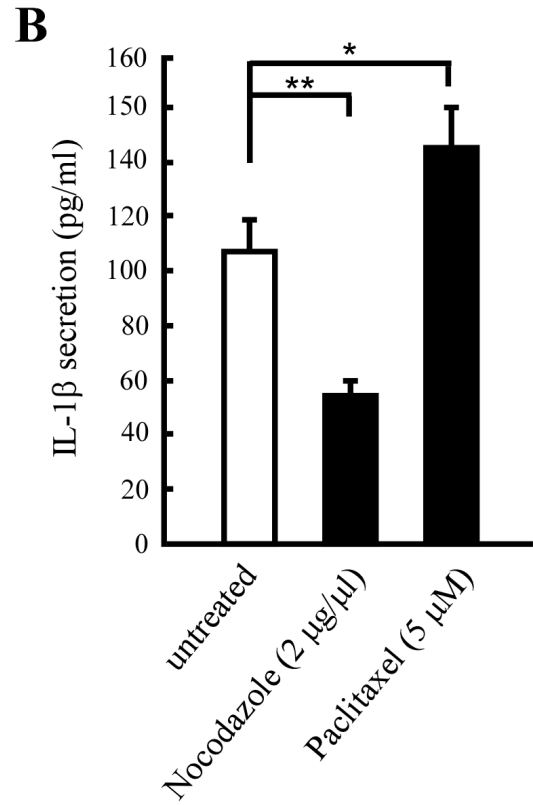



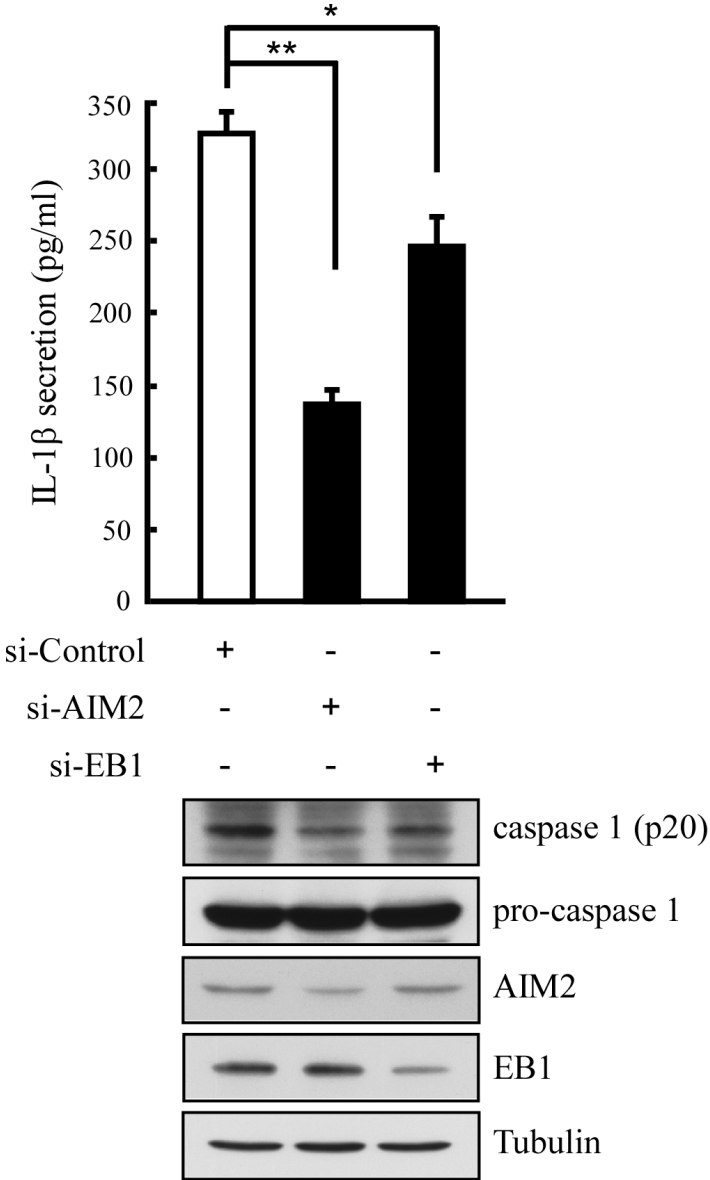

Supplement: supp_M112.020594_mcp.M112.020594-1.pdf [file supp_M112.020594_mcp.M112.020594-1.pdf]
