# Supplementary material
Source: PubMed Central journal article supplement (PMC3494205)
Supplement: supp_M112.020594_mcp.M112.020594-2.pdf [file supp_M112.020594_mcp.M112.020594-2.pdf]

**Supplementary Table S1. The list of proteins identified in ASC-pulled down complexes after treatments**

| Gene symbol     | Accession No. | Protein name                | Protein probability | No. of identified peptides | Percent coverage % | iTRAQ ratio                                 |           |                   |        |                   |       | Spectrum No. for quantification | Peptide sequence              | Peptide probability | Mascot score |                |                |     | Change    | Actual peptide mass | Calculated peptide mass | Observed m/z | Error (AMU) | Error (ppm) | iTRAQ reporter intensity |          |          |     | Peptide for quantification |
|-----------------|---------------|-----------------------------|---------------------|----------------------------|--------------------|---------------------------------------------|-----------|-------------------|--------|-------------------|-------|---------------------------------|-------------------------------|---------------------|--------------|----------------|----------------|-----|-----------|---------------------|-------------------------|--------------|-------------|-------------|--------------------------|----------|----------|-----|----------------------------|
|                 |               |                             |                     |                            |                    | H <sub>2</sub> O <sub>2</sub> /UN (116/114) |           | dADT/UN (117/114) |        | EBER/UN (115/114) |       |                                 |                               |                     | Ion score    | Identity score | Homology score | 114 |           |                     |                         |              |             |             | 115                      | 116      | 117      |     |                            |
|                 |               |                             |                     |                            |                    | SD                                          | SD        | SD                | SD     | SD                | SD    |                                 |                               |                     |              |                |                |     |           |                     |                         |              |             |             |                          |          |          |     |                            |
| A2M             | P01023        | Alpha-2-macroglobulin       | 1.00                | 5                          | 4.2                | 1.06                                        | 0.19      | 0.97              | 0.15   | 0.98              | 0.20  | 17                              | GEAFTLK                       | 0.87                | 31.57        | 27.79          | 26.94          | 2   | 1052.6066 | 1052.6110           | 527.3128                | -0.0044      | -4.1721     | 83.80       | 89.49                    | 86.10    | 102.79   | Yes |                            |
|                 |               |                             |                     |                            |                    |                                             |           |                   |        |                   |       |                                 | GEAFTLK                       | 0.96                | 37.79        | 27.19          | 40.21          | 2   | 1052.6086 | 1052.6110           | 527.3128                | -0.0024      | -2.2757     | 131.80      | 154.02                   | 165.05   | 142.20   | Yes |                            |
|                 |               |                             |                     |                            |                    |                                             |           |                   |        |                   |       |                                 | GEAFTLK                       | 0.75                | 22.15        | 27.19          | 26.57          | 2   | 1052.6088 | 1052.6110           | 527.3128                | -0.0022      | -2.0861     | 56.63       | 46.55                    | 55.17    | 48.11    | Yes |                            |
|                 |               |                             |                     |                            |                    |                                             |           |                   |        |                   |       |                                 | QQNAQGGFSSTQDTVVALHALSK       | 0.52                | 95.17        | 26.20          | 108.17         | 3   | 2674.3921 | 2674.3918           | 892.4712                | 0.0003       | 0.1120      | 182.06      | 203.29                   | 192.42   | 186.56   | Yes |                            |
|                 |               |                             |                     |                            |                    |                                             |           |                   |        |                   |       |                                 | YGAATFTR                      | 1.00                | 40.53        | 27.17          | 31.35          | 2   | 1029.5362 | 1029.5365           | 515.7755                | -0.0003      | -0.2908     | 15456.29    | 23899.03                 | 22662.78 | 23109.87 | Yes |                            |
|                 |               |                             |                     |                            |                    |                                             |           |                   |        |                   |       |                                 | YGAATFTR                      | 1.00                | 42.98        | 27.12          | 31.40          | 2   | 1029.5366 | 1029.5365           | 515.7755                | 0.0001       | 0.0969      | 10639.01    | 14566.08                 | 14258.25 | 12328.91 | Yes |                            |
|                 |               |                             |                     |                            |                    |                                             |           |                   |        |                   |       |                                 | YGAATFTR                      | 1.00                | 41.71        | 27.08          | 31.30          | 2   | 1029.5368 | 1029.5365           | 515.7755                | 0.0003       | 0.2908      | 7856.89     | 10838.01                 | 11791.85 | 10434.15 | Yes |                            |
|                 |               |                             |                     |                            |                    |                                             |           |                   |        |                   |       |                                 | YGAATFTR                      | 0.99                | 35.00        | 27.14          | 30.73          | 2   | 1029.5372 | 1029.5365           | 515.7755                | 0.0007       | 0.6786      | 2212.41     | 3119.75                  | 2926.86  | 2734.02  | Yes |                            |
|                 |               |                             |                     |                            |                    |                                             |           |                   |        |                   |       |                                 | ATVLNLYPK                     | 1.00                | 43.34        | 24.90          | 25.03          | 2   | 1305.7896 | 1305.7900           | 653.9023                | -0.0004      | -0.3059     | 2048.25     | 2362.51                  | 2557.82  | 2715.99  | Yes |                            |
|                 |               |                             |                     |                            |                    |                                             |           |                   |        |                   |       |                                 | ATVLNLYPK                     | 1.00                | 26.62        | 24.84          | 22.34          | 3   | 1305.7900 | 1305.7900           | 436.2706                | 0.0000       | 0.0000      | 289.55      | 311.58                   | 248.97   | 336.99   | Yes |                            |
|                 |               |                             |                     |                            |                    |                                             |           |                   |        |                   |       |                                 | ATVLNLYPK                     | 1.00                | 43.44        | 23.78          | 27.87          | 2   | 1305.7910 | 1305.7900           | 653.9023                | 0.0010       | 0.7646      | 5135.42     | 5363.55                  | 6514.51  | 6095.66  | Yes |                            |
|                 |               |                             |                     |                            |                    |                                             |           |                   |        |                   |       |                                 | ATVLNLYPK                     | 0.98                | 21.44        | 24.01          | 20.49          | 3   | 1305.7921 | 1305.7900           | 436.2706                | 0.0021       | 1.6045      | 518.33      | 450.70                   | 522.44   | 551.59   | Yes |                            |
|                 |               |                             |                     |                            |                    |                                             |           |                   |        |                   |       |                                 | YGAATFTR                      | 1.00                | 38.97        | 27.14          | 30.43          | 2   | 1029.5370 | 1029.5365           | 515.7755                | 0.0005       | 0.4847      | 997.36      | 1392.69                  | 1282.20  | 1218.32  | Yes |                            |
|                 |               |                             |                     |                            |                    |                                             |           |                   |        |                   |       |                                 | YGAATFTR                      | 0.99                | 38.91        | 27.02          | 30.39          | 2   | 1029.5382 | 1029.5365           | 515.7755                | 0.0017       | 1.6480      | 603.63      | 819.11                   | 814.08   | 829.69   | Yes |                            |
|                 |               |                             |                     |                            |                    |                                             |           |                   |        |                   |       |                                 | ATVLNLYPK                     | 1.00                | 58.06        | 24.90          | 31.97          | 2   | 1305.7898 | 1305.7900           | 653.9023                | -0.0002      | -0.1529     | 1244.26     | 1416.44                  | 1479.82  | 1551.37  | Yes |                            |
|                 |               |                             |                     |                            |                    |                                             |           |                   |        |                   |       |                                 | ATVLNLYPK                     | 1.00                | 49.23        | 24.49          | 26.24          | 2   | 1305.7904 | 1305.7900           | 653.9023                | 0.0004       | 0.3059      | 2201.01     | 2662.37                  | 2456.39  | 2668.39  | Yes |                            |
|                 |               |                             |                     |                            |                    |                                             |           |                   |        |                   |       |                                 | ATVLNLYPK                     | 0.80                | 13.17        | 23.82          | 19.54          | 3   | 1305.7915 | 1305.7900           | 436.2706                | 0.0015       | 1.1461      | 113.33      | 144.74                   | 168.07   | 118.38   | Yes |                            |
|                 |               |                             |                     |                            |                    |                                             |           |                   |        |                   |       |                                 | ALLAYAFALAGNQDK               | 0.98                | 23.12        | 26.24          | 15.18          | 3   | 1853.0302 | 1853.0290           | 618.6836                | 0.0012       | 0.6465      | 21.81       | 13.04                    | 25.80    | 25.66    | No  |                            |
|                 |               |                             |                     |                            |                    |                                             |           |                   |        |                   |       |                                 | ALLAYAFALAGNQDK               | 0.98                | 22.48        | 26.23          | 15.68          | 3   | 1853.0305 | 1853.0290           | 618.6836                | 0.0015       | 0.8082      | 7.91        | 6.18                     | 5.51     | 9.18     | No  |                            |
|                 |               |                             |                     |                            |                    |                                             |           |                   |        |                   |       |                                 | ALLAYAFALAGNQDK               | 1.00                | 35.84        | 26.33          | 16.39          | 3   | 1853.0314 | 1853.0290           | 618.6836                | 0.0024       | 1.2931      | 13.43       | 10.53                    | 12.06    | 19.04    | No  |                            |
| ALLAYAFALAGNQDK | 1.00          | 56.88                       | 25.94               | 16.74                      | 2                  | 1853.0328                                   | 1853.0290 | 927.5218          | 0.0038 | 2.0485            | 6.49  | 4.50                            | 5.33                          | 6.44                | No           |                |                |     |           |                     |                         |              |             |             |                          |          |          |     |                            |
| ALLAYAFALAGNQDK | 0.52          | 40.53                       | 26.31               | 53.53                      | 3                  | 1853.0293                                   | 1853.0290 | 618.6836          | 0.0003 | 0.1616            | 31.23 | 19.86                           | 16.39                         | 16.39               | No           |                |                |     |           |                     |                         |              |             |             |                          |          |          |     |                            |
| ALLAYAFALAGNQDK | 0.97          | 30.83                       | 25.63               | 15.48                      | 3                  | 1853.0359                                   | 1853.0290 | 618.6836          | 0.0069 | 3.7176            | 14.06 | 16.45                           | 18.59                         | 7.91                | No           |                |                |     |           |                     |                         |              |             |             |                          |          |          |     |                            |
| ACACB           | O00763        | Acetyl-CoA carboxylase 2    | 1.00                | 2                          | 0.6                | 0.59                                        | 0.01      | 0.79              | 0.02   | 0.69              | 0.04  | 2                               | ITIGNK                        | 0.71                | 18.12        | 27.87          | 27.76          | 2   | 932.5902  | 932.5898            | 467.3022                | 0.0004       | 0.4280      | 12052.21    | 9591.30                  | 8293.46  | 11551.19 | Yes |                            |
|                 |               |                             |                     |                            |                    |                                             |           |                   |        |                   |       |                                 | ITIGNK                        | 0.59                | 18.04        | 27.87          | 23.71          | 2   | 932.5904  | 932.5898            | 467.3022                | 0.0006       | 0.6420      | 8123.60     | 6951.64                  | 5449.55  | 7973.31  | Yes |                            |
| ACTA2           | P62736        | Actin, aortic smooth muscle | 1.00                | 10                         | 31.9               | 1.02                                        | 0.24      | 1.15              | 0.26   | 0.91              | 0.39  | 51                              | MGAMVAFR                      | 0.84                | 18.36        | 25.19          | 21.49          | 2   | 1057.5168 | 1057.5171           | 529.7658                | -0.0003      | -0.2831     | 22.74       | 79.94                    | 8.68     | 41.28    | No  |                            |
|                 |               |                             |                     |                            |                    |                                             |           |                   |        |                   |       |                                 | CDVDIR                        | 0.99                | 32.59        | 23.71          | 34.24          | 2   | 909.4170  | 909.4170            | 455.7158                | 0.0000       | 0.0000      | 205.87      | 245.32                   | 262.52   | 315.80   | Yes |                            |
| ACTA2           | P62736        | Actin, aortic smooth muscle | 1.00                | 10                         | 31.9               | 1.02                                        | 0.24      | 1.15              | 0.26   | 0.91              | 0.39  | 51                              | CDVDIR                        | 0.96                | 32.89        | 24.35          | 34.63          | 2   | 909.4194  | 909.4170            | 455.7158                | 0.0024       | 2.6332      | 228.82      | 343.58                   | 347.92   | 404.59   | Yes |                            |
|                 |               |                             |                     |                            |                    |                                             |           |                   |        |                   |       |                                 | CDVDIR                        | 0.84                | 19.04        | 23.89          | 24.37          | 2   | 909.4178  | 909.4170            | 455.7158                | 0.0008       | 0.8777      | 18.32       | 18.31                    | 13.50    | 26.76    | No  |                            |
|                 |               |                             |                     |                            |                    |                                             |           |                   |        |                   |       |                                 | CDVDIR                        | 0.74                | 16.65        | 23.82          | 22.73          | 2   | 909.4182  | 909.4170            | 455.7158                | 0.0012       | 1.3166      | 23.78       | 28.67                    | 33.30    | 26.86    | No  |                            |
|                 |               |                             |                     |                            |                    |                                             |           |                   |        |                   |       |                                 | CDVDIR                        | 0.83                | 21.44        | 23.78          | 26.36          | 2   | 909.4186  | 909.4170            | 455.7158                | 0.0016       | 1.7555      | 21.13       | 30.59                    | 19.66    | 38.17    | No  |                            |
|                 |               |                             |                     |                            |                    |                                             |           |                   |        |                   |       |                                 | DLTDYLMK                      | 1.00                | 52.43        | 27.77          | 21.53          | 2   | 1285.6838 | 1285.6832           | 643.8489                | 0.0006       | 0.4659      | 4478.29     | 3947.85                  | 4220.88  | 5964.96  | Yes |                            |
|                 |               |                             |                     |                            |                    |                                             |           |                   |        |                   |       |                                 | DLTDYLMK                      | 1.00                | 59.89        | 27.75          | 22.77          | 2   | 1285.6844 | 1285.6832           | 643.8489                | 0.0012       | 0.9319      | 6123.93     | 5991.93                  | 5461.82  | 8870.03  | Yes |                            |
|                 |               |                             |                     |                            |                    |                                             |           |                   |        |                   |       |                                 | SYELPDGQVITIGNER              | 1.00                | 70.52        | 27.84          | 17.73          | 2   | 1933.9848 | 1933.9867           | 968.0006                | -0.0019      | -0.9814     | 573.07      | 596.17                   | 690.50   | 1012.62  | Yes |                            |
|                 |               |                             |                     |                            |                    |                                             |           |                   |        |                   |       |                                 | CDVDIRK                       | 0.91                | 28.22        | 27.60          | 18.12          | 2   | 1181.6156 | 1181.6140           | 591.8143                | 0.0016       | 1.3518      | 1594.90     | 2483.21                  | 2588.32  | 2818.83  | Yes |                            |
|                 |               |                             |                     |                            |                    |                                             |           |                   |        |                   |       |                                 | DLTDYLMK                      | 1.00                | 63.46        | 27.84          | 23.94          | 2   | 1285.6860 | 1285.6832           | 643.8489                | 0.0028       | 2.1744      | 7004.22     | 6723.91                  | 6394.59  | 9724.05  | Yes |                            |
|                 |               |                             |                     |                            |                    |                                             |           |                   |        |                   |       |                                 | IAPPER                        | 0.96                | 24.12        | 23.42          | 27.42          | 2   | 938.5684  | 938.5671            | 470.2908                | 0.0013       | 1.3821      | 48094.44    | 64434.63                 | 64024.48 | 77228.96 | Yes |                            |
|                 |               |                             |                     |                            |                    |                                             |           |                   |        |                   |       |                                 | IAPPER                        | 0.88                | 24.06        | 25.09          | 26.76          | 2   | 938.5692  | 938.5671            | 470.2908                | 0.0021       | 2.2327      | 59783.59    | 72224.01                 | 72725.11 | 91693.41 | Yes |                            |
|                 |               |                             |                     |                            |                    |                                             |           |                   |        |                   |       |                                 | IAPPER                        | 0.97                | 25.44        | 24.52          | 28.03          | 2   | 938.5672  | 938.5671            | 470.2908                | 0.0001       | 0.1063      | 6693.50     | 7723.19                  | 7495.66  | 11040.82 | Yes |                            |
|                 |               |                             |                     |                            |                    |                                             |           |                   |        |                   |       |                                 | IAPPER                        | 0.97                | 25.18        | 24.52          | 27.89          | 2   | 938.5672  | 938.5671            | 470.2908                | 0.0001       | 0.1063      | 22700.66    | 27204.53                 | 24491.08 | 33551.11 | Yes |                            |
|                 |               |                             |                     |                            |                    |                                             |           |                   |        |                   |       |                                 | IAPPERK                       | 1.00                | 33.79        | 21.21          | 26.11          | 3   | 1210.7641 | 1210.7641           | 404.5953                | 0.0000       | 0.0000      | 9504.72     | 11352.89                 | 12632.23 | 14633.40 | Yes |                            |
|                 |               |                             |                     |                            |                    |                                             |           |                   |        |                   |       |                                 | HQGMVGMGQK                    | 0.98                | 28.55        | 28.09          | 19.17          | 3   | 1474.7611 | 1474.7628           | 492.5949                | -0.0017      | -1.1504     | 501.95      | 371.34                   | 382.01   | 553.81   | Yes |                            |
|                 |               |                             |                     |                            |                    |                                             |           |                   |        |                   |       |                                 | HQGMVGMGQK                    | 0.61                | 16.32        | 28.20          | 15.62          | 3   | 1474.7620 | 1474.7628           | 492.5949                | -0.0008      | -0.5414     | 146.46      | 122.96                   | 152.71   | 135.01   | Yes |                            |
|                 |               |                             |                     |                            |                    |                                             |           |                   |        |                   |       |                                 | TGIVMDSGDGVTHTVPIYEGYALPHAILR | 1.00                | 35.67        | 26.46          | 21.21          | 4   | 3182.6169 | 3182.6071           | 796.6591                | 0.0098       | 3.0753      | 77.00       | 91.53                    | 33.77    | 36.93    | No  |                            |
|                 |               |                             |                     |                            |                    |                                             |           |                   |        |                   |       |                                 | IAPPER                        | 0.94                | 25.50        | 23.42          | 28.12          | 2   | 938.5688  | 938.5671            | 470.2908                | 0.0017       | 1.8074      | 6156.85     | 7188.74                  | 7010.67  | 9608.11  | Yes |                            |
|                 |               |                             |                     |                            |                    |                                             |           |                   |        |                   |       |                                 | IAPPERK                       | 1.00                | 31.79        | 21.24          | 23.93          | 3   | 1210.7644 | 1210.7641           | 404.5953                | 0.0003       | 0.2472      | 14127.50    | 12879.89                 | 19094.69 | 21712.16 | Yes |                            |
|                 |               |                             |                     |                            |                    |                                             |           |                   |        |                   |       |                                 | IAPPERK                       | 1.00                | 34.19        | 21.55          | 26.78          | 3   | 1210.7650 | 1210.7641           | 404.5953                | 0.0009       | 0.7415      | 9103.24     | 10348.55                 | 11826.23 | 13782.18 | Yes |                            |
|                 |               |                             |                     |                            |                    |                                             |           |                   |        |                   |       |                                 | IAPPERK                       | 1.00                | 34.50        | 20.97          | 22.06          | 2   | 1210.7650 | 1210.7641           | 606.3893                | 0.0009       | 0.7421      | 75.66       | 68.38                    | 116.08   | 120.00   | Yes |                            |
|                 |               |                             |                     |                            |                    |                                             |           |                   |        |                   |       |                                 | IAPPERK                       | 0.98                | 24.04        | 20.97          | 15.31          | 2   | 1210.7656 | 1210.7641           | 606.3893                | 0.0015       | 1.2368      | 136.22      | 163.01                   | 151.75   | 166.87   | Yes |                            |
|                 |               |                             |                     |                            |                    |                                             |           |                   |        |                   |       |                                 | HQGMVGMGQK                    | 1.00                | 53.80        | 28.14          | 26.96          | 2   | 1458.7662 | 1458.7679           | 730.3912                | -0.0017      | -1.1638     | 4940.89     | 6447.88                  | 6170.81  | 7510.64  | Yes |                            |
|                 |               |                             |                     |                            |                    |                                             |           |                   |        |                   |       |                                 | HQGMVGMGQK                    | 1.00                | 51.70        | 28.43          | 21.79          | 2   | 1458.7672 | 1458.7679           | 730.3912                | -0.0007      | -0.4792     | 4713.89     | 4978.58                  | 6092.94  | 6689.96  | Yes |                            |
|                 |               |                             |                     |                            |                    |                                             |           |                   |        |                   |       |                                 | HQGMVGMGQK                    | 1.00                | 29.61        | 28.39          | 15.11          | 3   | 1458.7684 | 1458.7679           | 487.2632                | 0.0005       | 0.3420      | 3453.60     | 3915.84                  | 4061.89  | 5301.36  | Yes |                            |
|                 |               |                             |                     |                            |                    |                                             |           |                   |        |                   |       |                                 | HQGMVGMGQK                    | 0.89                | 22.81        | 28.37          | 18.38          | 3   | 1458.7720 | 1458.7679           | 487.2632                | 0.0041       | 2.8048      | 11402.08    | 14122.88                 | 16523.55 | 21898.42 | Yes |                            |
|                 |               |                             |                     |                            |                    |                                             |           |                   |        |                   |       |                                 | HQGMVGMGQK                    | 0.99                | 29.03        | 28.18          | 25.12          | 3   | 1474.7623 | 1474.7628           | 492.5949                | -0.0005      | -0.3383     | 648.81      | 1696.72                  | 827.51   | 936.17   | No  |                            |
|                 |               |                             |                     |                            |                    |                                             |           |                   |        |                   |       |                                 | HQGMVGMGQK                    | 1.00                | 30.92        | 28.23          | 20.92          | 3   | 1474.7626 | 1474.7628           | 492.5949                | -0.0002      | -0.1353     | 678.66      | 1524.03                  | 934.05   | 1174.36  | Yes |                            |
|                 |               |                             |                     |                            |                    |                                             |           |                   |        |                   |       |                                 | HQGMVGMGQK                    | 1.00                | 32.29        | 28.33          | 21.90          | 3   | 1458.7672 | 1458.7679           | 487.2632                | -0.0007      | -0.4789     | 521.68      | 641.41                   | 587.96   | 857.98   | Yes |                            |
|                 |               |                             |                     |                            |                    |                                             |           |                   |        |                   |       |                                 | HQGMVGMGQK                    | 1.00                | 31.03        | 28.43          | 17.01          | 3   | 1458.7693 | 1458.7679           | 487.2632                | 0.0014       | 0.9577      | 580.38      | 558.69                   | 547.84   | 633.60   | Yes |                            |
|                 |               |                             |                     |                            |                    |                                             |           |                   |        |                   |       |                                 | TGIVMDSGDGVTHTVPIYEGYALPHAILR | 1.00                | 78.90        | 25.33          | 91.90          | 4   | 3326.7169 | 3326.7091           | 832.6846                | 0.0078       | 2.3418      | 393.10      | 464.24                   | 530.24   |          |     |                            |

















|                          |        |                                                          |       |        |      |           |           |          |         |         |          |          |                          |         |                                               |       |       |     |           |           |          |         |         |         |         |                          |          |       |
|--------------------------|--------|----------------------------------------------------------|-------|--------|------|-----------|-----------|----------|---------|---------|----------|----------|--------------------------|---------|-----------------------------------------------|-------|-------|-----|-----------|-----------|----------|---------|---------|---------|---------|--------------------------|----------|-------|
| FN1                      | P02751 | Fibronectin                                              | 1.00  | 2      | 0.8  | 1.21      | 0.19      | 1.06     | 0.16    | 1.49    | 0.58     | 8        | VNVDGASHPNK              | 0.52    | 25.54                                         | 27.64 | 38.54 | 3   | 1366.7557 | 1366.7561 | 456.5926 | -0.0004 | -0.2920 | 21.54   | 34.09   | 30.77                    | 29.78    | No    |
|                          |        |                                                          |       |        |      |           |           |          |         |         |          |          | LGVVRPSQGGGEAPR          | 1.00    | 35.43                                         | 27.17 | 19.62 | 3   | 1466.8066 | 1466.8076 | 489.9431 | -0.0010 | -0.6804 | 167.22  | 249.75  | 234.55                   | 204.41   | Yes   |
|                          |        |                                                          |       |        |      |           |           |          |         |         |          |          | LGVRPSQGGGEAPR           | 1.00    | 33.56                                         | 27.32 | 24.52 | 3   | 1466.8060 | 1466.8076 | 489.9431 | -0.0016 | -1.0886 | 648.12  | 1439.89 | 960.44                   | 969.30   | Yes   |
|                          |        |                                                          |       |        |      |           |           |          |         |         |          |          | LGVRPSQGGGEAPR           | 1.00    | 34.29                                         | 27.17 | 18.43 | 3   | 1466.8066 | 1466.8076 | 489.9431 | -0.0010 | -0.6804 | 314.15  | 814.31  | 524.10                   | 450.69   | Yes   |
|                          |        |                                                          |       |        |      |           |           |          |         |         |          |          | LGVRPSQGGGEAPR           | 0.68    | 33.09                                         | 27.90 | 21.14 | 3   | 1466.7988 | 1466.8076 | 489.9431 | -0.0088 | -5.9871 | 199.01  | 413.93  | 311.79                   | 263.29   | Yes   |
|                          |        |                                                          |       |        |      |           |           |          |         |         |          |          | LGVRPSQGGGEAPR           | 1.00    | 37.91                                         | 27.32 | 18.89 | 3   | 1466.8060 | 1466.8076 | 489.9431 | -0.0016 | -1.0886 | 258.04  | 683.59  | 378.27                   | 382.43   | Yes   |
|                          |        |                                                          |       |        |      |           |           |          |         |         |          |          | ITCTSR                   | 0.69    | 14.83                                         | 24.89 | 23.46 | 2   | 869.4218  | 869.4221  | 435.7183 | -0.0003 | -0.3443 | 723.30  | 924.95  | 891.57                   | 870.40   | Yes   |
|                          |        |                                                          |       |        |      |           |           |          |         |         |          |          | ITCTSR                   | 0.88    | 19.52                                         | 24.89 | 19.35 | 2   | 869.4220  | 869.4221  | 435.7183 | -0.0001 | -0.1148 | 943.95  | 1244.98 | 1175.61                  | 1082.59  | Yes   |
|                          |        |                                                          |       |        |      |           |           |          |         |         |          |          | ITCTSR                   | 0.78    | 16.56                                         | 24.89 | 19.39 | 2   | 869.4222  | 869.4221  | 435.7183 | 0.0001  | 0.1148  | 672.08  | 899.85  | 733.40                   | 723.58   | Yes   |
|                          |        |                                                          |       |        |      |           |           |          |         |         |          |          | ITVAMSNLQR               | 0.98    | 29.61                                         | 27.83 | 31.79 | 2   | 1178.6196 | 1178.6199 | 590.3172 | -0.0003 | -0.2541 | 7.99    | 18.06   | 19.22                    | 14.26    | No    |
|                          |        |                                                          |       |        |      |           |           |          |         |         |          |          | INPSTYK                  | 0.53    | 14.97                                         | 27.62 | 18.09 | 2   | 1094.5726 | 1094.5730 | 548.2938 | -0.0004 | -0.3648 | 16.46   | 14.33   | 12.34                    | 19.02    | No    |
|                          |        |                                                          |       |        |      |           |           |          |         |         |          |          | FRS3                     | O43559  | Fibroblast growth factor receptor substrate 3 | 0.91  | 2     | 1.8 | -         | -         | -        | -       | -       | -       | 0       | APKPDGPGGGPGGSHMGGNYGDDR | 1.00     | 35.78 |
| APKPDGPGGGPGGSHMGGNYGDDR | 1.00   | 54.92                                                    | 25.60 | 67.92  | 4    | 2540.1709 | 2540.1707 | 636.0500 | 0.0002  | 0.0786  | 2427.34  | 3414.51  |                          |         |                                               |       |       |     |           |           |          |         |         |         |         | 3056.27                  | 3028.37  | Yes   |
| APKPDGPGGGPGGSHMGGNYGDDR | 1.00   | 46.79                                                    | 25.61 | 59.79  | 4    | 2540.1729 | 2540.1707 | 636.0500 | 0.0022  | 0.8647  | 4476.94  | 8972.75  |                          |         |                                               |       |       |     |           |           |          |         |         |         |         | 6797.58                  | 5627.73  | Yes   |
| APKPDGPGGGPGGSHMGGNYGDDR | 1.00   | 26.61                                                    | 24.97 | 39.61  | 4    | 2556.1653 | 2556.1656 | 640.0487 | -0.0003 | -0.1172 | 316.66   | 445.77   |                          |         |                                               |       |       |     |           |           |          |         |         |         |         | 349.10                   | 346.50   | Yes   |
| APKPDGPGGGPGGSHMGGNYGDDR | 0.52   | 42.29                                                    | 24.97 | 55.29  | 3    | 2556.1654 | 2556.1656 | 635.0625 | -0.0002 | -0.0781 | 17.91    | 26.62    |                          |         |                                               |       |       |     |           |           |          |         |         |         |         | 18.54                    | 24.41    | No    |
| APKPDGPGGGPGGSHMGGNYGDDR | 1.00   | 65.24                                                    | 25.71 | 78.24  | 4    | 2540.1753 | 2540.1707 | 636.0500 | 0.0046  | 1.8080  | 2450.09  | 3138.97  |                          |         |                                               |       |       |     |           |           |          |         |         |         |         | 2042.47                  | 3093.00  | Yes   |
| APKPDGPGGGPGGSHMGGNYGDDR | 1.00   | 57.68                                                    | 25.71 | 70.68  | 4    | 2540.1745 | 2540.1707 | 636.0500 | 0.0038  | 1.4936  | 1339.98  | 2503.76  |                          |         |                                               |       |       |     |           |           |          |         |         |         |         | 1608.64                  | 1731.08  | Yes   |
| APKPDGPGGGPGGSHMGGNYGDDR | 1.00   | 49.27                                                    | 25.75 | 62.27  | 4    | 2540.1749 | 2540.1707 | 636.0500 | 0.0042  | 1.6508  | 398.61   | 787.25   |                          |         |                                               |       |       |     |           |           |          |         |         |         |         | 522.96                   | 610.82   | Yes   |
| EFGNPIK                  | 1.00   | 37.49                                                    | 27.68 | 31.52  | 2    | 1178.6542 | 1178.6539 | 590.3342 | 0.0003  | 0.2541  | 3495.94  | 4221.39  |                          |         |                                               |       |       |     |           |           |          |         |         |         |         | 3096.62                  | 3479.04  | Yes   |
| EFGNPIK                  | 0.99   | 32.64                                                    | 27.68 | 27.88  | 2    | 1178.6542 | 1178.6539 | 590.3342 | 0.0003  | 0.2541  | 22970.13 | 29754.25 |                          |         |                                               |       |       |     |           |           |          |         |         |         |         | 21018.54                 | 23400.70 | Yes   |
| LKGEATVSDPSSAK           | 1.00   | 48.24                                                    | 26.42 | 19.35  | 3    | 2093.1367 | 2093.1370 | 698.7196 | -0.0003 | -0.1431 | 102.64   | 178.15   |                          |         |                                               |       |       |     |           |           |          |         |         |         |         | 111.72                   | 99.93    | Yes   |
| LKGEATVSDPSSAK           | 1.00   | 55.89                                                    | 26.11 | 21.24  | 3    | 2093.1430 | 2093.1370 | 698.7196 | 0.0060  | 2.8624  | 682.96   | 1018.15  |                          |         |                                               |       |       |     |           |           |          |         |         |         |         | 779.18                   | 935.43   | Yes   |
| FUS                      | P35637 | RNA-binding protein FUS                                  | 1.00  | 6      | 18.7 | 0.93      | 0.20      | 0.94     | 0.22    | 1.20    | 0.32     | 22       | APKPDGPGGGPGGSHMGGNYGDDR | 1.00    | 59.04                                         | 25.58 | 72.04 | 4   | 2540.1713 | 2540.1707 | 636.0500 | 0.0006  | 0.2358  | 805.00  | 1165.55 | 856.26                   | 902.85   | Yes   |
|                          |        |                                                          |       |        |      |           |           |          |         |         |          |          | APKPDGPGGGPGGSHMGGNYGDDR | 1.00    | 52.04                                         | 25.69 | 65.04 | 4   | 2540.1737 | 2540.1707 | 636.0500 | 0.0030  | 1.1792  | 1008.21 | 1621.13 | 1367.19                  | 1253.76  | Yes   |
|                          |        |                                                          |       |        |      |           |           |          |         |         |          |          | APKPDGPGGGPGGSHMGGNYGDDR | 1.00    | 32.44                                         | 25.00 | 45.44 | 4   | 2556.1665 | 2556.1656 | 640.0487 | 0.0009  | 0.3515  | 118.69  | 123.62  | 129.18                   | 134.37   | Yes   |
|                          |        |                                                          |       |        |      |           |           |          |         |         |          |          | EFGNPIK                  | 0.66    | 27.50                                         | 28.55 | 25.62 | 2   | 1178.6500 | 1178.6539 | 590.3342 | -0.0039 | -3.3032 | 32.82   | 36.58   | 24.28                    | 34.46    | Yes   |
|                          |        |                                                          |       |        |      |           |           |          |         |         |          |          | EFGNPIK                  | 0.67    | 21.71                                         | 28.17 | 23.89 | 2   | 1178.6522 | 1178.6539 | 590.3342 | -0.0017 | -1.4399 | 32.43   | 52.91   | 36.93                    | 50.21    | No    |
|                          |        |                                                          |       |        |      |           |           |          |         |         |          |          | APKPDGPGGGPGGSHMGGNYGDDR | 1.00    | 34.23                                         | 25.51 | 16.85 | 4   | 2540.1665 | 2540.1707 | 636.0500 | -0.0042 | -1.6508 | 22.50   | 31.82   | 35.98                    | 25.37    | No    |
|                          |        |                                                          |       |        |      |           |           |          |         |         |          |          | APKPDGPGGGPGGSHMGGNYGDDR | 1.00    | 42.84                                         | 25.49 | 15.96 | 4   | 2540.1677 | 2540.1707 | 636.0500 | -0.0030 | -1.1792 | 15.63   | 34.78   | 17.99                    | 8.39     | No    |
|                          |        |                                                          |       |        |      |           |           |          |         |         |          |          | APKPDGPGGGPGGSHMGGNYGDDR | 1.00    | 28.62                                         | 25.59 | 16.50 | 4   | 2540.1705 | 2540.1707 | 636.0500 | -0.0002 | -0.0786 | 17.00   | 38.98   | 36.02                    | 41.23    | No    |
|                          |        |                                                          |       |        |      |           |           |          |         |         |          |          | TGQPMINLYTDR             | 1.00    | 56.40                                         | 27.90 | 34.77 | 2   | 1551.7816 | 1551.7837 | 776.8991 | -0.0021 | -1.3515 | 668.52  | 1389.01 | 905.80                   | 983.39   | Yes   |
|                          |        |                                                          |       |        |      |           |           |          |         |         |          |          | TGQPMINLYTDR             | 1.00    | 53.93                                         | 27.91 | 28.73 | 2   | 1551.7826 | 1551.7837 | 776.8991 | -0.0011 | -0.7079 | 462.55  | 731.91  | 575.48                   | 626.21   | Yes   |
|                          |        |                                                          |       |        |      |           |           |          |         |         |          |          | TGQPMINLYTDR             | 1.00    | 66.96                                         | 28.03 | 34.17 | 2   | 1551.7834 | 1551.7837 | 776.8991 | -0.0003 | -0.1931 | 152.29  | 302.15  | 278.16                   | 227.21   | No    |
|                          |        |                                                          |       |        |      |           |           |          |         |         |          |          | KTGQPMINLYTDR            | 1.00    | 47.24                                         | 27.20 | 20.65 | 3   | 1823.9920 | 1823.9807 | 609.0008 | 0.0113  | 6.1850  | 2216.01 | 3117.77 | 2338.23                  | 2514.88  | Yes   |
| CPNPTCENMNFNSWR          | 1.00   | 54.81                                                    | 15.31 | 17.86  | 2    | 1949.7472 | 1949.7473 | 975.8809 | -0.0001 | -0.0512 | 75.49    | 91.13    | 76.78                    | 84.80   | Yes                                           |       |       |     |           |           |          |         |         |         |         |                          |          |       |
| CPNPTCENMNFNSWR          | 1.00   | 50.94                                                    | 15.68 | 17.24  | 2    | 1949.7492 | 1949.7473 | 975.8809 | 0.0019  | 0.9735  | 53.54    | 76.84    | 47.74                    | 60.79   | Yes                                           |       |       |     |           |           |          |         |         |         |         |                          |          |       |
| CPNPTCENMNFNSWR          | 1.00   | 83.35                                                    | 16.13 | 18.22  | 2    | 1933.7510 | 1933.7524 | 967.8835 | -0.0014 | -0.7232 | 138.96   | 139.50   | 103.64                   | 109.07  | Yes                                           |       |       |     |           |           |          |         |         |         |         |                          |          |       |
| CPNPTCENMNFNSWR          | 0.74   | 87.33                                                    | 16.13 | 100.33 | 2    | 1933.7516 | 1933.7524 | 967.8835 | -0.0008 | -0.4133 | 121.30   | 155.80   | 102.88                   | 105.23  | Yes                                           |       |       |     |           |           |          |         |         |         |         |                          |          |       |
| CPNPTCENMNFNSWR          | 0.80   | 61.54                                                    | 15.56 | 74.54  | 2    | 1949.7476 | 1949.7473 | 975.8809 | 0.0003  | 0.1537  | 68.78    | 78.46    | 43.40                    | 66.14   | No                                            |       |       |     |           |           |          |         |         |         |         |                          |          |       |
| CPNPTCENMNFNSWR          | 1.00   | 83.32                                                    | 16.13 | 19.52  | 2    | 1933.7510 | 1933.7524 | 967.8835 | -0.0014 | -0.7232 | 130.12   | 132.41   | 119.49                   | 98.23   | Yes                                           |       |       |     |           |           |          |         |         |         |         |                          |          |       |
| GART                     | P22102 | Trifunctional purine biosynthetic protein adenosine-3    | 1.00  | 2      | 2.2  | 1.14      | 0.09      | 0.88     | 0.00    | 1.26    | 0.77     | 2        | TVAPMPPAQDHKR            | 0.89    | 15.80                                         | 27.57 | 17.84 | 4   | 1734.9441 | 1734.9443 | 434.7434 | -0.0002 | -0.1150 | 179.08  | 192.16  | 192.35                   | Yes      |       |
|                          |        |                                                          |       |        |      |           |           |          |         |         |          |          | VLIIGSGGR                | 0.96    | 25.89                                         | 24.68 | 25.57 | 2   | 1014.6316 | 1014.6308 | 508.3227 | 0.0008  | 0.7869  | 39.29   | 84.69   | 52.25                    | Yes      |       |
| GNB2L1                   | P63244 | Guanine nucleotide-binding protein subunit beta-2-like 1 | 1.00  | 2      | 6.3  | 1.03      | -         | 0.94     | -       | 1.04    | -        | 1        | LWDLTGTGTTTR             | 1.00    | 61.62                                         | 28.43 | 20.13 | 2   | 1407.7472 | 1407.7480 | 704.8813 | -0.0008 | -0.5675 | 1047.91 | 1312.19 | 1236.79                  | 1205.99  | Yes   |
|                          |        |                                                          |       |        |      |           |           |          |         |         |          |          | VWQVTIGTR                | 1.00    | 45.76                                         | 27.49 | 20.34 | 2   | 1202.6896 | 1202.6894 | 602.3520 | 0.0002  | 0.1660  | 26.84   | 28.26   | 30.61                    | 27.56    | No    |
|                          |        |                                                          |       |        |      |           |           |          |         |         |          |          | VWQVTIGTR                | 0.77    | 20.73                                         | 27.35 | 18.95 | 2   | 1202.6906 | 1202.6894 | 602.3520 | 0.0012  | 0.9961  | 21.82   | 28.08   | 13.29                    | 18.95    | No    |
|                          |        |                                                          |       |        |      |           |           |          |         |         |          |          | ESDDGTTELEVR             | 1.00    | 65.84                                         | 24.13 | 28.58 | 2   | 1521.6908 | 1521.6916 | 761.8531 | -0.0008 | -0.5250 | 50.23   | 72.76   | 54.30                    | 64.05    | Yes   |
|                          |        |                                                          |       |        |      |           |           |          |         |         |          |          | ESDDGTTELEVR             | 1.00    | 61.72                                         | 24.13 | 26.92 | 2   | 1521.6908 | 1521.6916 | 761.8531 | -0.0008 | -0.5250 | 167.29  | 234.79  | 153.66                   | 186.22   | Yes   |
|                          |        |                                                          |       |        |      |           |           |          |         |         |          |          | DTASLSTTPSSEPR           | 1.00    | 75.78                                         | 27.30 | 25.61 | 2   | 1591.7792 | 1591.7811 | 796.8978 | -0.0019 | -1.1921 | 189.55  | 261.54  | 141.01                   | 213.00   | Yes   |
|                          |        |                                                          |       |        |      |           |           |          |         |         |          |          | DTASLSTTPSSEPR           | 1.00    | 42.41                                         | 27.23 | 17.42 | 2   | 1591.7794 | 1591.7811 | 796.8978 | -0.0017 | -1.0666 | 2.05    | 7.38    | 4.40                     | 9.72     | No    |
|                          |        |                                                          |       |        |      |           |           |          |         |         |          |          | IPDSISR                  | 0.67    | 28.76                                         | 26.84 | 27.48 | 2   | 1043.6166 | 1043.6097 | 522.8121 | 0.0069  | 6.5989  | 966.87  | 983.78  | 879.71                   | 906.34   | Yes   |
|                          |        |                                                          |       |        |      |           |           |          |         |         |          |          | MSPFPILTSMDDK            | 1.00    | 54.40                                         | 27.60 | 18.05 | 2   | 1540.7856 | 1540.7873 | 771.4009 | -0.0017 | -1.1019 | 594.42  | 911.01  | 622.63                   | 683.89   | Yes   |
|                          |        |                                                          |       |        |      |           |           |          |         |         |          |          | MSPFPILTSMDDK            | 1.00    | 71.59                                         | 27.57 | 18.96 | 2   | 1540.7866 | 1540.7873 | 771.4009 | -0.0007 | -0.4537 | 403.43  | 582.67  | 451.62                   | 533.17   | Yes   |
|                          |        |                                                          |       |        |      |           |           |          |         |         |          |          | MSPFPILTSMDDK            | 1.00    | 45.93                                         | 27.32 | 19.63 | 2   | 1540.7850 | 1540.7873 | 771.4009 | -0.0023 | -1.4908 | 89.32   | 126.39  | 103.54                   | 104.72   | Yes   |
|                          |        |                                                          |       |        |      |           |           |          |         |         |          |          | GVQVLPDR                 | 0.95    | 37.49                                         | 24.03 | 33.20 | 2   | 911.5716  | 911.5674  | 456.7910 | 0.0042  | 4.5973  | 99.05   | 184.87  | 108.01                   | 123.21   | Yes   |
| GVQVLPDR                 | 0.99   | 46.57                                                    | 23.98 | 35.59  | 2    | 911.5718  | 911.5674  | 456.7910 | 0.0044  | 4.8162  | 93.85    | 165.66   | 132.37                   | 111.79  | Yes                                           |       |       |     |           |           |          |         |         |         |         |                          |          |       |
| TLINLPDGSK               | 0.77   | 10.51                                                    | 21.79 | 17.91  | 3    | 1342.8430 | 1342.8428 | 448.6215 | 0.0002  | 0.1486  | 159.54   | 169.44   | 163.01                   | 107.09  | Yes                                           |       |       |     |           |           |          |         |         |         |         |                          |          |       |
| VGVLTVSDSCFR             | 1.00   | 65.10                                                    | 27.91 | 23.50  | 2    | 1471.7282 | 1471.7285 | 736.8715 | -0.0003 | -0.2036 | 320.87   | 868.82   | 591.59                   | 500.14  | Yes                                           |       |       |     |           |           |          |         |         |         |         |                          |          |       |
| VGVLTVSDSCFR             | 1.00   | 59.79                                                    | 27.82 | 26.63  | 2    | 1471.7284 | 1471.7285 | 736.8715 | -0.0001 | -0.0679 | 195.08   | 370.71   | 261.91                   | 275.19  | Yes                                           |       |       |     |           |           |          |         |         |         |         |                          |          |       |
| VGVLTVSDSCFR             | 1.00   | 59.73                                                    | 27.82 | 23.14  | 2    | 1471.7284 | 1471.7285 | 736.8715 | -0.0001 | -0.0679 | 292.55   | 687.12   | 444.66                   | 525.42  | Yes                                           |       |       |     |           |           |          |         |         |         |         |                          |          |       |
| GSQECFQFILPALPHAIDLLR    | 1.00   | 50.12                                                    | 27.13 | 18.85  | 3    | 2557.3342 | 2557.3307 | 853.4508 | 0.0035  | 1.3670  | 1.12     | 6.84     | 2.52                     | 1.73    | No                                            |       |       |     |           |           |          |         |         |         |         |                          |          |       |
| KGSQECFQFILPALPHAIDLLR   | 1.00   | 45.51                                                    | 23.38 | 16.89  | 4    | 2829.5429 | 2829.5277 | 708.3892 | 0.0152  | 5.3643  | 2.02     | 15.62    | 9.13                     | 6.48    | No                                            |       |       |     |           |           |          |         |         |         |         |                          |          |       |
| KGSQECFQFILPALPHAIDLLR   | 1.00   | 57.46                                                    | 23.32 | 70.46  | 4    | 2829.5437 | 2829.5277 | 708.3892 | 0.0160  | 5.6466  | 2.78     | 15.90    | 1.12                     | 4.26    | No                                            |       |       |     |           |           |          |         |         |         |         |                          |          |       |
| CPDGSACCCELPDGSK         | 0.72   | 51.27                                                    | 11.14 | 64.27  | 2    | 1677.6134 | 1677.6121 | 839.8133 | 0.0013  | 0.7740  | 7.03     | 9.69     | 14.87                    | 6.08    | No                                            |       |       |     |           |           |          |         |         |         |         |                          |          |       |
| CPDGSACCCELPDGSK         | 0.99   | 25.57                                                    | 16.63 | 15.11  | 3    | 1821.7216 | 1821.7142 | 608.2453 | 0.0074  | 4.0554  | 48.24    | 81.72    | 74.97                    | 110.84  | No                                            |       |       |     |           |           |          |         |         |         |         |                          |          |       |
| CPDGSACCCELPDGSK         | 0.80   | 65.91                                                    | 15.44 | 78.91  | 2    | 1821.7140 | 1821.7142 | 911.8644 | -0.0002 | -0.1097 | 2558.88  | 3649.31  | 4155.62                  | 3611.54 | Yes                                           |       |       |     |           |           |          |         |         |         |         |                          |          |       |
| CPDGSACCCELPD            |        |                                                          |       |        |      |           |           |          |         |         |          |          |                          |         |                                               |       |       |     |           |           |          |         |         |         |         |                          |          |       |





| Protein                          | 0.98 | 1.00 | 1.02 | 1.04 | 1.06 | 1.08 | 1.10 | 1.12 | 1.14 | 1.16 | 1.18 | 1.20 | 1.22 | 1.24 | 1.26 | 1.28 | 1.30 | 1.32 | 1.34 | 1.36 | 1.38 | 1.40 | 1.42 | 1.44 | 1.46 | 1.48 | 1.50 | 1.52 | 1.54 | 1.56 | 1.58 | 1.60 | 1.62 | 1.64 | 1.66 | 1.68 | 1.70 | 1.72 | 1.74 | 1.76 | 1.78 | 1.80 | 1.82 | 1.84 | 1.86 | 1.88 | 1.90 | 1.92 | 1.94 | 1.96 | 1.98 | 2.00 |      |      |
|----------------------------------|------|------|------|------|------|------|------|------|------|------|------|------|------|------|------|------|------|------|------|------|------|------|------|------|------|------|------|------|------|------|------|------|------|------|------|------|------|------|------|------|------|------|------|------|------|------|------|------|------|------|------|------|------|------|
| Stress-70 protein, mitochondrial | 26   | 39.6 | 0.98 | 1.01 | 1.03 | 1.05 | 1.07 | 1.09 | 1.11 | 1.13 | 1.15 | 1.17 | 1.19 | 1.21 | 1.23 | 1.25 | 1.27 | 1.29 | 1.31 | 1.33 | 1.35 | 1.37 | 1.39 | 1.41 | 1.43 | 1.45 | 1.47 | 1.49 | 1.51 | 1.53 | 1.55 | 1.57 | 1.59 | 1.61 | 1.63 | 1.65 | 1.67 | 1.69 | 1.71 | 1.73 | 1.75 | 1.77 | 1.79 | 1.81 | 1.83 | 1.85 | 1.87 | 1.89 | 1.91 | 1.93 | 1.95 | 1.97 | 1.99 | 2.01 |

















|                   |      |        |       |        |   |           |           |           |         |         |         |         |         |         |     |
|-------------------|------|--------|-------|--------|---|-----------|-----------|-----------|---------|---------|---------|---------|---------|---------|-----|
| AEPNPSK           | 1.00 | 49.08  | 27.42 | 17.76  | 2 | 1130.6178 | 1130.6175 | 566.3160  | 0.0003  | 0.2649  | 949.05  | 1048.10 | 1221.31 | 1194.87 | Yes |
| AEPNPSK           | 1.00 | 51.16  | 27.35 | 22.75  | 2 | 1130.6180 | 1130.6175 | 566.3160  | 0.0005  | 0.4414  | 1257.78 | 1315.42 | 1555.71 | 1511.67 | Yes |
| AEPNPSK           | 1.00 | 51.48  | 27.57 | 24.14  | 2 | 1130.6184 | 1130.6175 | 566.3160  | 0.0009  | 0.7946  | 1163.19 | 1211.64 | 1377.71 | 1466.00 | Yes |
| GALLSMDALDLTDK    | 1.00 | 35.09  | 28.42 | 21.00  | 3 | 1605.8416 | 1605.8405 | 536.2874  | 0.0011  | 0.6837  | 7.65    | 11.13   | 3.89    | 7.04    | No  |
| GALLSMDALDLTDK    | 0.56 | 55.97  | 28.40 | 68.97  | 2 | 1605.8426 | 1605.8405 | 803.9275  | 0.0021  | 1.3061  | 0.00    | 0.00    | 0.00    | 6.34    | No  |
| ESQSYLVEDLERS     | 1.00 | 62.97  | 26.88 | 34.33  | 2 | 1697.8362 | 1697.8230 | 849.9188  | 0.0132  | 7.7654  | 23.12   | 14.46   | 23.81   | 30.81   | No  |
| DAILDALENLTAEELK  | 1.00 | 85.05  | 27.53 | 24.21  | 2 | 1901.0106 | 1901.0115 | 951.5130  | -0.0009 | -0.4729 | 9.16    | 2.52    | 2.97    | 4.49    | No  |
| DAILDALENLTAEELK  | 1.00 | 116.34 | 27.53 | 24.29  | 2 | 1901.0106 | 1901.0115 | 951.5130  | -0.0009 | -0.4729 | 9.28    | 2.57    | 2.67    | 9.42    | No  |
| DAILDALENLTAEELK  | 1.00 | 103.72 | 27.48 | 39.31  | 2 | 1901.0108 | 1901.0115 | 951.5130  | -0.0007 | -0.3678 | 34.78   | 27.07   | 26.35   | 40.93   | No  |
| DAILDALENLTAEELK  | 1.00 | 120.34 | 27.44 | 39.50  | 2 | 1901.0112 | 1901.0115 | 951.5130  | -0.0003 | -0.1576 | 14.94   | 8.03    | 9.61    | 20.16   | No  |
| DAILDALENLTAEELK  | 1.00 | 32.35  | 27.47 | 23.66  | 3 | 1901.0134 | 1901.0115 | 634.6778  | 0.0019  | 0.9979  | 51.24   | 32.93   | 35.25   | 37.28   | Yes |
| DAILDALENLTAEELK  | 1.00 | 32.51  | 27.60 | 23.11  | 3 | 1901.0137 | 1901.0115 | 634.6778  | 0.0022  | 1.1554  | 47.39   | 48.06   | 43.13   | 47.61   | Yes |
| DAILDALENLTAEELKK | 0.99 | 50.11  | 26.45 | 16.46  | 3 | 2029.1074 | 2029.1064 | 677.3761  | 0.0010  | 0.4921  | 18.46   | 9.89    | 14.96   | 14.31   | No  |
| DAILDALENLTAEELKK | 1.00 | 57.90  | 26.38 | 23.18  | 3 | 2029.1086 | 2029.1064 | 677.3761  | 0.0022  | 1.0826  | 20.45   | 26.11   | 17.49   | 12.80   | No  |
| DAILDALENLTAEELKK | 1.00 | 80.63  | 24.56 | 21.14  | 2 | 2173.2074 | 2173.2085 | 1087.6115 | -0.0011 | -0.5057 | 25.90   | 18.45   | 28.90   | 35.77   | No  |
| DAILDALENLTAEELKK | 1.00 | 91.49  | 24.42 | 22.51  | 2 | 2173.2094 | 2173.2085 | 1087.6115 | 0.0009  | 0.4138  | 27.87   | 15.07   | 22.06   | 24.88   | No  |
| DAILDALENLTAEELKK | 1.00 | 51.86  | 24.41 | 18.29  | 4 | 2173.2105 | 2173.2085 | 544.3094  | 0.0020  | 0.9186  | 56.54   | 54.70   | 52.33   | 63.08   | Yes |
| DAILDALENLTAEELKK | 1.00 | 45.39  | 24.41 | 58.39  | 4 | 2173.2105 | 2173.2085 | 544.3094  | 0.0020  | 0.9186  | 17.27   | 9.81    | 20.43   | 16.56   | No  |
| AEPNPSK           | 1.00 | 52.41  | 27.72 | 29.82  | 2 | 1130.6158 | 1130.6175 | 566.3160  | -0.0017 | -1.5009 | 83.90   | 86.36   | 111.46  | 106.99  | Yes |
| AEPNPSK           | 1.00 | 40.72  | 27.38 | 21.48  | 2 | 1130.6168 | 1130.6175 | 566.3160  | -0.0007 | -0.6180 | 243.49  | 284.15  | 276.00  | 262.17  | Yes |
| AEPNPSK           | 1.00 | 49.08  | 27.42 | 22.00  | 2 | 1130.6178 | 1130.6175 | 566.3160  | 0.0003  | 0.2649  | 823.78  | 892.35  | 1066.77 | 1146.25 | Yes |
| AEPNPSK           | 1.00 | 39.90  | 27.42 | 22.51  | 2 | 1130.6178 | 1130.6175 | 566.3160  | 0.0003  | 0.2649  | 857.46  | 934.49  | 1092.32 | 1049.99 | Yes |
| AEPNPSK           | 1.00 | 53.01  | 27.57 | 23.01  | 2 | 1130.6184 | 1130.6175 | 566.3160  | 0.0009  | 0.7946  | 774.72  | 841.68  | 957.25  | 1005.96 | Yes |
| AEPNPSK           | 1.00 | 51.07  | 27.51 | 22.38  | 2 | 1130.6186 | 1130.6175 | 566.3160  | 0.0011  | 0.9712  | 780.08  | 903.10  | 1061.61 | 1008.23 | Yes |
| AEPNPSK           | 1.00 | 51.46  | 27.68 | 23.00  | 2 | 1130.6192 | 1130.6175 | 566.3160  | 0.0017  | 1.5009  | 857.35  | 1015.77 | 1073.65 | 1156.28 | Yes |
| AEPNPSK           | 1.00 | 49.17  | 27.77 | 24.62  | 2 | 1130.6194 | 1130.6175 | 566.3160  | 0.0019  | 1.6775  | 783.87  | 976.54  | 1070.35 | 1123.38 | Yes |
| GALLSMDALDLTDK    | 0.79 | 22.32  | 28.41 | 21.09  | 2 | 1605.8420 | 1605.8405 | 803.9275  | 0.0015  | 0.9329  | 2.79    | 0.00    | 1.26    | 5.04    | No  |
| GALLSMDALDLTDK    | 1.00 | 79.63  | 28.41 | 21.68  | 2 | 1605.8420 | 1605.8405 | 803.9275  | 0.0015  | 0.9329  | 5.06    | 6.70    | 13.34   | 0.00    | No  |
| GALLSMDALDLTDK    | 0.97 | 25.25  | 28.40 | 19.64  | 3 | 1605.8422 | 1605.8405 | 536.2874  | 0.0017  | 1.0566  | 13.10   | 5.39    | 14.79   | 18.92   | No  |
| DAILDALENLTAEELK  | 1.00 | 113.22 | 27.44 | 22.26  | 2 | 1901.0110 | 1901.0115 | 951.5130  | -0.0005 | -0.2627 | 3.83    | 0.00    | 3.48    | 0.96    | No  |
| DAILDALENLTAEELK  | 0.56 | 107.87 | 27.47 | 120.87 | 2 | 1901.0132 | 1901.0115 | 951.5130  | 0.0017  | 0.8933  | 1.16    | 0.00    | 1.14    | 1.93    | No  |
| DAILDALENLTAEELK  | 1.00 | 58.78  | 27.60 | 18.57  | 3 | 1901.0140 | 1901.0115 | 634.6778  | 0.0025  | 1.3130  | 40.98   | 22.38   | 35.40   | 47.06   | No  |
| DAILDALENLTAEELK  | 1.00 | 55.56  | 27.50 | 23.18  | 3 | 1901.0143 | 1901.0115 | 634.6778  | 0.0028  | 1.4706  | 25.87   | 27.93   | 46.31   | 46.31   | No  |
| DAILDALENLTAEELKK | 0.98 | 52.66  | 26.44 | 20.06  | 3 | 2029.1104 | 2029.1064 | 677.3761  | 0.0040  | 1.9684  | 27.93   | 28.75   | 16.31   | 27.04   | No  |
| DAILDALENLTAEELKK | 0.74 | 74.61  | 24.56 | 87.61  | 2 | 2173.2074 | 2173.2085 | 1087.6115 | -0.0011 | -0.5057 | 59.83   | 37.01   | 80.24   | 94.18   | Yes |
| DAILDALENLTAEELKK | 1.00 | 75.64  | 24.42 | 20.33  | 2 | 2173.2094 | 2173.2085 | 1087.6115 | 0.0009  | 0.4138  | 68.37   | 68.77   | 92.55   | 112.52  | Yes |
| DAILDALENLTAEELKK | 1.00 | 44.48  | 24.41 | 16.56  | 3 | 2173.2121 | 2173.2085 | 725.4101  | 0.0036  | 1.6542  | 11.18   | 8.64    | 16.66   | 32.03   | No  |
| DAILDALENLTAEELKK | 1.00 | 36.75  | 24.41 | 15.37  | 4 | 2173.2121 | 2173.2085 | 544.3094  | 0.0036  | 1.6535  | 61.85   | 43.72   | 66.82   | 67.82   | Yes |
| DAILDALENLTAEELKK | 1.00 | 48.03  | 24.41 | 17.41  | 4 | 2173.2121 | 2173.2085 | 544.3094  | 0.0036  | 1.6535  | 33.41   | 17.57   | 26.14   | 31.51   | No  |
| DAILDALENLTAEELKK | 1.00 | 45.89  | 24.41 | 20.73  | 4 | 2173.2121 | 2173.2085 | 544.3094  | 0.0036  | 1.6535  | 20.50   | 25.41   | 19.12   | 21.19   | No  |
| DAILDALENLTAEELKK | 1.00 | 28.74  | 24.39 | 19.37  | 4 | 2173.2125 | 2173.2085 | 544.3094  | 0.0040  | 1.8372  | 81.17   | 76.02   | 103.91  | 113.90  | Yes |
| DAILDALENLTAEELKK | 1.00 | 63.94  | 24.36 | 24.68  | 3 | 2173.2133 | 2173.2085 | 725.4101  | 0.0048  | 2.2056  | 747.70  | 631.28  | 1065.66 | 971.78  | Yes |
| DAILDALENLTAEELKK | 0.52 | 58.55  | 21.85 | 71.55  | 3 | 2317.3117 | 2317.3106 | 773.4441  | 0.0011  | 0.4741  | 10.39   | 10.55   | 9.12    | 16.63   | No  |
| DAILDALENLTAEELKK | 0.52 | 58.72  | 21.58 | 71.72  | 3 | 2317.3120 | 2317.3106 | 773.4441  | 0.0014  | 0.6034  | 17.11   | 24.92   | 25.35   | 23.48   | No  |
| AEPNPSK           | 1.00 | 50.27  | 27.71 | 27.86  | 2 | 1130.6162 | 1130.6175 | 566.3160  | -0.0013 | -1.1478 | 266.06  | 242.11  | 277.06  | 269.89  | Yes |
| AEPNPSK           | 1.00 | 52.79  | 27.36 | 25.00  | 2 | 1130.6166 | 1130.6175 | 566.3160  | -0.0009 | -0.7946 | 236.42  | 281.85  | 277.36  | 273.20  | Yes |
| AEPNPSK           | 1.00 | 48.87  | 27.47 | 23.59  | 2 | 1130.6174 | 1130.6175 | 566.3160  | -0.0001 | -0.0883 | 28.61   | 24.15   | 41.59   | 28.29   | No  |
| AEPNPSK           | 1.00 | 50.79  | 27.47 | 22.33  | 2 | 1130.6174 | 1130.6175 | 566.3160  | -0.0001 | -0.0883 | 239.62  | 288.29  | 302.74  | 273.66  | Yes |
| AEPNPSK           | 1.00 | 50.85  | 27.42 | 25.18  | 2 | 1130.6176 | 1130.6175 | 566.3160  | 0.0001  | 0.0883  | 221.46  | 272.80  | 246.76  | 292.46  | Yes |
| AEPNPSK           | 1.00 | 55.04  | 27.42 | 22.82  | 2 | 1130.6178 | 1130.6175 | 566.3160  | 0.0003  | 0.2649  | 258.47  | 212.41  | 266.34  | 248.78  | Yes |
| AEPNPSK           | 1.00 | 50.79  | 27.35 | 24.32  | 2 | 1130.6180 | 1130.6175 | 566.3160  | 0.0005  | 0.4414  | 225.66  | 288.46  | 274.44  | 300.78  | Yes |
| DAILDALENLTAEELK  | 1.00 | 72.40  | 27.53 | 25.96  | 2 | 1901.0106 | 1901.0115 | 951.5130  | -0.0009 | -0.4729 | 2.00    | 0.00    | 3.19    | 0.00    | No  |
| DAILDALENLTAEELK  | 1.00 | 84.08  | 27.44 | 22.77  | 2 | 1901.0114 | 1901.0115 | 951.5130  | -0.0001 | -0.0525 | 1.23    | 1.05    | 0.89    | 1.90    | No  |
| DAILDALENLTAEELK  | 1.00 | 47.81  | 27.47 | 16.64  | 3 | 1901.0134 | 1901.0115 | 634.6778  | 0.0019  | 0.9979  | 21.16   | 22.98   | 20.54   | 26.46   | No  |
| DAILDALENLTAEELK  | 0.91 | 20.21  | 27.60 | 18.45  | 3 | 1901.0140 | 1901.0115 | 634.6778  | 0.0025  | 1.3130  | 14.27   | 12.53   | 20.41   | 20.60   | No  |
| DAILDALENLTAEELK  | 1.00 | 66.09  | 26.58 | 21.62  | 3 | 2045.1151 | 2045.1135 | 682.7118  | 0.0016  | 0.7812  | 15.18   | 8.71    | 13.80   | 18.16   | No  |
| DAILDALENLTAEELKK | 0.74 | 84.57  | 24.56 | 97.57  | 2 | 2173.2074 | 2173.2085 | 1087.6115 | -0.0011 | -0.5057 | 18.21   | 18.56   | 14.45   | 24.96   | No  |
| DAILDALENLTAEELKK | 1.00 | 78.28  | 24.42 | 20.71  | 2 | 2173.2094 | 2173.2085 | 1087.6115 | 0.0009  | 0.4138  | 25.36   | 20.91   | 32.13   | 31.44   | No  |
| DAILDALENLTAEELKK | 1.00 | 55.77  | 24.41 | 21.20  | 4 | 2173.2105 | 2173.2085 | 544.3094  | 0.0020  | 0.9186  | 50.40   | 38.08   | 60.13   | 75.11   | Yes |
| DAILDALENLTAEELKK | 1.00 | 45.68  | 24.39 | 15.90  | 3 | 2173.2106 | 2173.2085 | 725.4101  | 0.0021  | 0.9650  | 6.46    | 3.65    | 6.06    | 4.63    | No  |
| DAILDALENLTAEELKK | 1.00 | 73.39  | 24.47 | 20.40  | 3 | 2173.2112 | 2173.2085 | 725.4101  | 0.0027  | 1.2407  | 194.85  | 157.20  | 208.64  | 276.12  | Yes |
| DAILDALENLTAEELKK | 1.00 | 55.92  | 24.47 | 17.13  | 3 | 2173.2112 | 2173.2085 | 725.4101  | 0.0027  | 1.2407  | 7.32    | 4.55    | 14.66   | 12.18   | No  |
| DAILDALENLTAEELKK | 1.00 | 52.93  | 24.44 | 65.93  | 4 | 2173.2113 | 2173.2085 | 544.3094  | 0.0028  | 1.2860  | 63.48   | 49.86   | 77.62   | 82.71   | Yes |
| DAILDALENLTAEELKK | 1.00 | 52.72  | 24.39 | 20.84  | 4 | 2173.2125 | 2173.2085 | 544.3094  | 0.0040  | 1.8372  | 58.29   | 43.85   | 51.63   | 62.50   | Yes |
| DAILDALENLTAEELKK | 1.00 | 44.07  | 24.39 | 16.41  | 4 | 2173.2125 | 2173.2085 | 544.3094  | 0.0040  | 1.8372  | 25.58   | 9.63    | 10.62   | 21.01   | No  |
| AEPNPSK           | 1.00 | 52.59  | 27.36 | 26.30  | 2 | 1130.6166 | 1130.6175 | 566.3160  | -0.0009 | -0.7946 | 46.32   | 47.40   | 75.13   | 54.76   | Yes |
| AEPNPSK           | 1.00 | 47.68  | 27.47 | 20.13  | 2 | 1130.6174 | 1130.6175 | 566.3160  | -0.0001 | -0.0883 | 46.35   | 63.67   | 63.21   | 69.39   | Yes |
| VLTDQYQAVR        | 1.00 | 72.68  | 27.55 | 26.58  | 2 | 1320.6666 | 1320.6674 | 661.3410  | -0.0008 | -0.6048 | 437.59  | 194.31  | 357.38  | 512.32  | Yes |
| GALLSMDALDLTDK    | 1.00 | 88.93  | 27.85 | 25.41  | 2 | 1765.9422 | 1765.9375 | 883.9760  | 0.0047  | 2.6584  | 226.12  | 132.96  | 169.78  | 199.84  | Yes |
| DAILDALENLTAEELK  | 1.00 | 94.89  | 27.53 | 26.17  | 2 | 1901.0094 | 1901.0115 | 951.5130  | -0.0021 | -1.1035 | 6.87    | 13.27   | 24.23   | 9.74    | No  |
| DAILDALENLTAEELK  | 1.00 | 67.49  | 27.44 | 24.96  | 2 | 1901.0110 | 1901.0115 | 951.5130  | -0.0005 | -0.2627 | 5.97    | 7.36    | 7.91    | 6.20    | No  |
| DAILDALENLTAEELK  | 0.85 | 18.45  | 27.47 | 19.67  | 3 | 1901.0134 | 1901.0115 | 634.6778  | 0.0019  | 0.9979  | 28.87   | 16.75   | 24.84   |         |     |

|                   |      |        |       |        |   |           |           |           |         |         |           |           |           |           |     |
|-------------------|------|--------|-------|--------|---|-----------|-----------|-----------|---------|---------|-----------|-----------|-----------|-----------|-----|
| DAILDALENLTAHEELK | 1.00 | 97.63  | 24.42 | 22.92  | 2 | 2173.2094 | 2173.2085 | 1087.6115 | 0.0009  | 0.4138  | 13.48     | 10.37     | 27.03     | 11.63     | No  |
| DAILDALENLTAHEELK | 1.00 | 50.85  | 24.44 | 16.87  | 4 | 2173.2109 | 2173.2085 | 544.3094  | 0.0024  | 1.1023  | 133.94    | 79.26     | 120.24    | 107.04    | Yes |
| DAILDALENLTAHEELK | 1.00 | 50.40  | 24.39 | 63.40  | 4 | 2173.2117 | 2173.2085 | 544.3094  | 0.0032  | 1.4698  | 34.16     | 36.35     | 33.15     | 34.37     | Yes |
| DAILDALENLTAHEELK | 1.00 | 44.92  | 24.41 | 15.84  | 3 | 2173.2121 | 2173.2085 | 725.4101  | 0.0036  | 1.6542  | 9.49      | 13.61     | 9.02      | 12.37     | No  |
| DAILDALENLTAHEELK | 0.81 | 22.83  | 24.39 | 17.38  | 4 | 2173.2125 | 2173.2085 | 544.3094  | 0.0040  | 1.8372  | 26.10     | 17.19     | 14.29     | 33.14     | No  |
| DAILDALENLTAHEELK | 0.99 | 68.42  | 24.41 | 27.00  | 3 | 2173.2136 | 2173.2085 | 725.4101  | 0.0051  | 2.3435  | 38.51     | 22.34     | 33.68     | 42.34     | No  |
| DAILDALENLTAHEELK | 1.00 | 43.95  | 24.41 | 56.95  | 4 | 2173.2137 | 2173.2085 | 544.3094  | 0.0052  | 2.3883  | 109.91    | 54.38     | 86.61     | 109.43    | Yes |
| DAILDALENLTAHEELK | 1.00 | 87.82  | 24.33 | 24.01  | 3 | 2173.2142 | 2173.2085 | 725.4101  | 0.0057  | 2.6192  | 44.83     | 31.48     | 32.22     | 30.51     | Yes |
| VLTDQYQAVR        | 1.00 | 55.57  | 28.11 | 31.30  | 2 | 1464.7676 | 1464.7694 | 733.3920  | -0.0018 | -1.2272 | 10.51     | 8.04      | 12.05     | 11.30     | No  |
| VLTDQYQAVR        | 1.00 | 37.52  | 28.16 | 33.58  | 3 | 1464.7690 | 1464.7694 | 489.2637  | -0.0004 | -0.0725 | 425.91    | 675.35    | 249.61    | 579.95    | Yes |
| VLTDQYQAVR        | 1.00 | 36.07  | 28.00 | 25.83  | 3 | 1464.7699 | 1464.7694 | 489.2637  | 0.0005  | 0.3406  | 233.46    | 332.43    | 192.08    | 314.93    | Yes |
| VLTDQYQAVR        | 1.00 | 59.95  | 28.23 | 22.17  | 2 | 1464.7728 | 1464.7694 | 733.3920  | 0.0034  | 2.3180  | 358.21    | 454.82    | 447.59    | 464.02    | Yes |
| VLTDQYQAVR        | 1.00 | 55.23  | 28.12 | 25.99  | 2 | 1464.7732 | 1464.7694 | 733.3920  | 0.0038  | 2.5907  | 100066.81 | 128129.17 | 137881.44 | 129793.47 | Yes |
| GALLSMDALDLTDK    | 1.00 | 67.75  | 28.01 | 22.23  | 2 | 1765.9386 | 1765.9375 | 883.9760  | 0.0011  | 0.6222  | 497.87    | 317.45    | 423.41    | 577.65    | Yes |
| GALLSMDALDLTDK    | 1.00 | 42.72  | 28.03 | 28.21  | 3 | 1765.9390 | 1765.9375 | 589.6531  | 0.0015  | 0.8480  | 54.54     | 43.26     | 27.57     | 28.46     | No  |
| GALLSMDALDLTDK    | 1.00 | 76.73  | 27.86 | 24.17  | 2 | 1765.9404 | 1765.9375 | 883.9760  | 0.0029  | 1.6403  | 2284.40   | 1424.60   | 2485.54   | 2269.11   | Yes |
| GALLSMDALDLTDK    | 1.00 | 35.43  | 27.87 | 27.22  | 3 | 1765.9408 | 1765.9375 | 589.6531  | 0.0033  | 1.8655  | 37.35     | 16.07     | 44.97     | 26.22     | No  |
| DAILDALENLTAHEELK | 1.00 | 101.08 | 27.54 | 37.68  | 2 | 1901.0102 | 1901.0115 | 951.5130  | -0.0013 | -0.6831 | 40.38     | 31.44     | 23.15     | 38.64     | No  |
| DAILDALENLTAHEELK | 1.00 | 87.61  | 27.53 | 22.98  | 2 | 1901.0106 | 1901.0115 | 951.5130  | -0.0009 | -0.4729 | 0.00      | 1.59      | 2.24      | 1.36      | No  |
| DAILDALENLTAHEELK | 1.00 | 94.63  | 27.46 | 38.59  | 2 | 1901.0116 | 1901.0115 | 951.5130  | 0.0001  | 0.0525  | 37.45     | 17.15     | 15.90     | 31.61     | No  |
| DAILDALENLTAHEELK | 0.98 | 26.03  | 27.60 | 27.09  | 3 | 1901.0137 | 1901.0115 | 634.6778  | 0.0022  | 1.1554  | 35.45     | 37.98     | 50.79     | 39.56     | Yes |
| DAILDALENLTAHEELK | 0.57 | 15.27  | 27.50 | 22.25  | 3 | 1901.0143 | 1901.0115 | 634.6778  | 0.0028  | 1.4706  | 44.83     | 32.60     | 43.99     | 55.98     | Yes |
| DAILDALENLTAHEELK | 1.00 | 86.42  | 26.61 | 27.10  | 2 | 2045.1134 | 2045.1135 | 1023.5640 | -0.0001 | -0.0488 | 971.73    | 1032.88   | 1298.01   | 1379.99   | Yes |
| DAILDALENLTAHEELK | 1.00 | 88.60  | 26.61 | 28.68  | 2 | 2045.1134 | 2045.1135 | 1023.5640 | -0.0001 | -0.0488 | 2663.43   | 1839.02   | 2681.55   | 2581.12   | Yes |
| DAILDALENLTAHEELK | 1.00 | 37.86  | 26.58 | 22.00  | 3 | 2045.1157 | 2045.1135 | 682.7118  | 0.0022  | 1.0741  | 16.58     | 9.83      | 8.17      | 11.03     | No  |
| DAILDALENLTAHEELK | 1.00 | 33.91  | 26.58 | 16.63  | 3 | 2045.1157 | 2045.1135 | 682.7118  | 0.0022  | 1.0741  | 3.66      | 5.05      | 7.21      | 11.23     | No  |
| DAILDALENLTAHEELK | 0.92 | 22.19  | 26.55 | 16.34  | 3 | 2045.1175 | 2045.1135 | 682.7118  | 0.0040  | 1.9530  | 5.52      | 6.61      | 14.21     | 10.80     | No  |
| DAILDALENLTAHEELK | 1.00 | 78.81  | 24.56 | 20.13  | 2 | 2173.2074 | 2173.2085 | 1087.6115 | -0.0011 | -0.5057 | 183.62    | 163.47    | 259.44    | 315.52    | Yes |
| DAILDALENLTAHEELK | 1.00 | 77.50  | 24.42 | 18.92  | 2 | 2173.2094 | 2173.2085 | 1087.6115 | 0.0009  | 0.4138  | 239.52    | 143.00    | 307.73    | 272.52    | Yes |
| DAILDALENLTAHEELK | 1.00 | 37.20  | 24.44 | 22.38  | 4 | 2173.2109 | 2173.2085 | 544.3094  | 0.0024  | 1.1023  | 34.31     | 15.51     | 45.67     | 48.29     | No  |
| DAILDALENLTAHEELK | 1.00 | 43.93  | 24.44 | 24.15  | 4 | 2173.2113 | 2173.2085 | 544.3094  | 0.0028  | 1.2860  | 667.83    | 625.11    | 775.40    | 743.33    | Yes |
| DAILDALENLTAHEELK | 1.00 | 69.15  | 24.28 | 18.17  | 3 | 2173.2163 | 2173.2085 | 725.4101  | 0.0078  | 3.5842  | 1573.37   | 1990.15   | 2833.37   | 2148.51   | Yes |
| DAILDALENLTAHEELK | 0.52 | 63.33  | 21.85 | 76.33  | 3 | 2317.3117 | 2317.3106 | 773.4441  | 0.0011  | 0.4741  | 56.69     | 77.20     | 108.30    | 78.14     | Yes |
| VLTDQYQAVR        | 1.00 | 82.14  | 27.40 | 23.49  | 2 | 1320.6672 | 1320.6674 | 661.3410  | -0.0002 | -0.1512 | 490.89    | 488.28    | 489.00    | 525.62    | Yes |
| VLTDQYQAVR        | 1.00 | 43.38  | 28.39 | 36.85  | 3 | 1464.7705 | 1464.7694 | 489.2637  | 0.0011  | 0.7494  | 1182.48   | 1305.57   | 722.76    | 1765.99   | Yes |
| VLTDQYQAVR        | 0.97 | 42.11  | 28.21 | 21.33  | 2 | 1464.7744 | 1464.7694 | 733.3920  | 0.0050  | 3.4088  | 256655.04 | 322303.84 | 348486.10 | 333807.76 | Yes |
| VLTDQYQAVR        | 0.98 | 45.52  | 28.17 | 31.31  | 3 | 1464.7825 | 1464.7694 | 489.2637  | 0.0131  | 8.9249  | 1014.52   | 1377.72   | 553.91    | 2114.61   | Yes |
| VLTDQYQAVR        | 1.00 | 56.60  | 28.14 | 26.92  | 2 | 1464.7832 | 1464.7694 | 733.3920  | 0.0138  | 9.4083  | 34142.46  | 40345.79  | 50321.64  | 49945.35  | Yes |
| GALLSMDALDLTDK    | 1.00 | 81.41  | 28.03 | 24.61  | 2 | 1765.9390 | 1765.9375 | 883.9760  | 0.0015  | 0.8484  | 262.72    | 214.47    | 279.42    | 290.52    | Yes |
| GALLSMDALDLTDK    | 1.00 | 67.14  | 28.05 | 21.38  | 2 | 1765.9394 | 1765.9375 | 883.9760  | 0.0019  | 1.0747  | 158.04    | 81.35     | 122.23    | 160.52    | Yes |
| GALLSMDALDLTDK    | 1.00 | 36.60  | 27.88 | 25.51  | 3 | 1765.9399 | 1765.9375 | 589.6531  | 0.0024  | 1.3567  | 55.99     | 21.89     | 45.03     | 36.03     | No  |
| DAILDALENLTAHEELK | 1.00 | 77.84  | 26.61 | 27.09  | 2 | 2045.1134 | 2045.1135 | 1023.5640 | -0.0001 | -0.0488 | 102.80    | 183.31    | 179.97    | 161.63    | Yes |
| DAILDALENLTAHEELK | 1.00 | 97.10  | 26.61 | 27.63  | 2 | 2045.1134 | 2045.1135 | 1023.5640 | -0.0001 | -0.0488 | 132.00    | 138.45    | 126.17    | 190.75    | Yes |
| DAILDALENLTAHEELK | 1.00 | 95.13  | 26.64 | 24.54  | 3 | 2045.1142 | 2045.1135 | 682.7118  | 0.0007  | 0.3418  | 14.75     | 25.39     | 13.31     | 24.20     | No  |
| DAILDALENLTAHEELK | 1.00 | 77.64  | 26.58 | 21.93  | 3 | 2045.1148 | 2045.1135 | 682.7118  | 0.0013  | 0.6347  | 20.47     | 15.50     | 13.08     | 14.96     | No  |
| DAILDALENLTAHEELK | 1.00 | 81.96  | 26.55 | 24.88  | 3 | 2045.1166 | 2045.1135 | 682.7118  | 0.0031  | 1.5136  | 31.53     | 27.33     | 42.30     | 41.58     | No  |
| DAILDALENLTAHEELK | 1.00 | 76.82  | 24.56 | 20.27  | 2 | 2173.2074 | 2173.2085 | 1087.6115 | -0.0011 | -0.5057 | 37.55     | 29.72     | 47.08     | 38.61     | No  |
| DAILDALENLTAHEELK | 0.74 | 69.59  | 24.56 | 82.59  | 2 | 2173.2074 | 2173.2085 | 1087.6115 | -0.0011 | -0.5057 | 29.85     | 26.31     | 37.27     | 33.48     | No  |
| DAILDALENLTAHEELK | 1.00 | 70.33  | 24.39 | 18.97  | 3 | 2173.2106 | 2173.2085 | 725.4101  | 0.0021  | 0.9650  | 1086.59   | 1213.08   | 1495.08   | 951.09    | Yes |
| DAILDALENLTAHEELK | 1.00 | 63.39  | 24.39 | 18.63  | 3 | 2173.2127 | 2173.2085 | 725.4101  | 0.0042  | 1.9299  | 1333.94   | 870.58    | 1929.29   | 1581.37   | Yes |
| DAILDALENLTAHEELK | 0.96 | 55.76  | 24.33 | 16.94  | 3 | 2173.2151 | 2173.2085 | 725.4101  | 0.0066  | 3.0328  | 10.95     | 18.91     | 15.53     | 15.53     | No  |
| DAILDALENLTAHEELK | 1.00 | 51.71  | 22.01 | 29.43  | 4 | 2317.3093 | 2317.3106 | 580.3349  | -0.0013 | -0.5600 | 27.22     | 24.53     | 17.30     | 30.45     | No  |
| DAILDALENLTAHEELK | 1.00 | 78.36  | 21.99 | 22.43  | 2 | 2317.3094 | 2317.3106 | 1159.6626 | -0.0012 | -0.5174 | 148.73    | 183.12    | 293.52    | 195.15    | Yes |
| DAILDALENLTAHEELK | 1.00 | 78.89  | 21.99 | 25.57  | 2 | 2317.3094 | 2317.3106 | 1159.6626 | -0.0012 | -0.5174 | 45.36     | 46.15     | 44.11     | 45.36     | Yes |
| DAILDALENLTAHEELK | 1.00 | 61.36  | 21.96 | 21.88  | 3 | 2317.3096 | 2317.3106 | 773.4441  | -0.0010 | -0.4310 | 41.02     | 56.60     | 58.50     | 41.46     | Yes |
| DAILDALENLTAHEELK | 0.52 | 68.64  | 21.85 | 81.64  | 3 | 2317.3111 | 2317.3106 | 773.4441  | 0.0005  | 0.2155  | 69.02     | 86.98     | 96.16     | 112.55    | Yes |
| DAILDALENLTAHEELK | 1.00 | 63.24  | 21.85 | 17.14  | 3 | 2317.3111 | 2317.3106 | 773.4441  | 0.0005  | 0.2155  | 70.22     | 66.83     | 68.85     | 79.81     | Yes |
| DAILDALENLTAHEELK | 1.00 | 62.65  | 21.85 | 21.61  | 3 | 2317.3111 | 2317.3106 | 773.4441  | 0.0005  | 0.2155  | 42.17     | 59.94     | 57.66     | 49.16     | Yes |
| DAILDALENLTAHEELK | 0.72 | 74.74  | 21.85 | 87.74  | 2 | 2317.3114 | 2317.3106 | 1159.6626 | 0.0008  | 0.3449  | 252.85    | 222.30    | 314.53    | 267.12    | Yes |
| DAILDALENLTAHEELK | 0.72 | 90.51  | 21.85 | 103.51 | 2 | 2317.3114 | 2317.3106 | 1159.6626 | 0.0008  | 0.3449  | 41.97     | 58.49     | 67.65     | 40.47     | Yes |
| DAILDALENLTAHEELK | 0.52 | 61.82  | 21.85 | 74.82  | 3 | 2317.3117 | 2317.3106 | 773.4441  | 0.0011  | 0.4741  | 59.10     | 67.60     | 58.27     | 52.08     | Yes |
| DAILDALENLTAHEELK | 1.00 | 53.67  | 21.64 | 21.55  | 4 | 2317.3125 | 2317.3106 | 580.3349  | 0.0019  | 0.8185  | 287.98    | 345.73    | 464.32    | 367.10    | Yes |
| DAILDALENLTAHEELK | 1.00 | 59.69  | 21.64 | 23.45  | 3 | 2317.3132 | 2317.3106 | 773.4441  | 0.0026  | 1.1205  | 2416.73   | 2974.42   | 3596.70   | 3248.91   | Yes |
| DAILDALENLTAHEELK | 1.00 | 58.89  | 21.64 | 20.28  | 3 | 2317.3132 | 2317.3106 | 773.4441  | 0.0026  | 1.1205  | 866.11    | 951.88    | 1304.06   | 1228.78   | Yes |
| DAILDALENLTAHEELK | 1.00 | 55.61  | 21.43 | 19.18  | 4 | 2317.3141 | 2317.3106 | 580.3349  | 0.0035  | 1.5077  | 128.07    | 169.23    | 199.41    | 180.25    | Yes |
| DAILDALENLTAHEELK | 1.00 | 67.58  | 21.43 | 31.22  | 3 | 2317.3144 | 2317.3106 | 773.4441  | 0.0038  | 1.6377  | 23.17     | 22.44     | 34.73     | 43.55     | No  |
| DAILDALENLTAHEELK | 1.00 | 57.27  | 21.43 | 70.27  | 4 | 2317.3157 | 2317.3106 | 580.3349  | 0.0051  | 2.1970  | 2182.74   | 2234.22   | 2817.85   | 2409.86   | Yes |
| DAILDALENLTAHEELK | 1.00 | 49.76  | 21.43 | 24.09  | 3 | 2317.3162 | 2317.3106 | 773.4441  | 0.0056  | 2.4134  | 18554.54  | 24361.81  | 29203.21  | 23721.29  | Yes |
| DAILDALENLTAHEELK | 1.00 | 44.88  | 21.30 | 20.87  | 4 | 2317.3169 | 2317.3106 | 580.3349  | 0.0063  | 2.7139  | 8620.56   | 8075.15   | 11246.40  | 10948.99  | Yes |
| VLTDQYQAVR        | 0.96 | 45.81  | 27.23 | 19.62  | 2 | 1320.6628 | 1320.6674 | 661.3410  | -0.0046 | -3.4778 | 23.12     | 24.67     | 20.14     | 26.64     | No  |
| VLTDQYQAVR        | 1.00 | 64.83  | 28.19 | 30.08  | 2 | 1464.7680 | 1464.7694 | 733.3920  | -0.0014 | -0.9545 | 18727     |           |           |           |     |

|                    |      |        |       |        |   |           |             |           |         |         |          |          |          |          |     |
|--------------------|------|--------|-------|--------|---|-----------|-------------|-----------|---------|---------|----------|----------|----------|----------|-----|
| GALLSMDALDLTDK     | 1.00 | 52.81  | 27.79 | 28.33  | 3 | 1749.9499 | 1749.9426   | 584.3215  | 0.0073  | 4.1644  | 975.75   | 1343.03  | 1257.50  | 1450.60  | Yes |
| VTNVEWLLDALYGK     | 1.00 | 41.89  | 27.54 | 16.78  | 2 | 1763.9594 | 1763.9580   | 882.9863  | 0.0014  | 0.7928  | 2.03     | 0.00     | 0.00     | 6.13     | No  |
| GALLSMDALDLTDK     | 1.00 | 87.22  | 28.01 | 24.31  | 2 | 1765.9380 | 1765.9375   | 883.9760  | 0.0005  | 0.2828  | 167.90   | 198.04   | 225.95   | 188.52   | Yes |
| GALLSMDALDLTDK     | 1.00 | 76.71  | 28.01 | 24.11  | 2 | 1765.9382 | 1765.9375   | 883.9760  | 0.0007  | 0.3959  | 212.41   | 196.62   | 226.96   | 205.24   | Yes |
| DAILDALENLTAEELK   | 1.00 | 86.24  | 26.61 | 27.39  | 2 | 2045.1134 | 2045.1135   | 1023.5640 | -0.0001 | -0.0488 | 52.91    | 62.63    | 61.77    | 67.47    | Yes |
| DAILDALENLTAEELK   | 1.00 | 119.68 | 26.61 | 30.50  | 2 | 2045.1134 | 2045.1135   | 1023.5640 | -0.0001 | -0.0488 | 40.30    | 44.23    | 46.75    | 39.87    | Yes |
| DAILDALENLTAEELK   | 1.00 | 72.51  | 26.58 | 22.90  | 3 | 2045.1148 | 2045.1135   | 682.7118  | 0.0013  | 0.6347  | 41.48    | 41.26    | 32.45    | 30.43    | Yes |
| DAILDALENLTAEELK   | 1.00 | 66.95  | 26.58 | 22.36  | 3 | 2045.1151 | 2045.1135   | 682.7118  | 0.0016  | 0.7812  | 137.20   | 150.36   | 166.66   | 177.09   | Yes |
| DAILDALENLTAEELKK  | 1.00 | 59.56  | 24.41 | 18.62  | 3 | 2173.2121 | 2173.2085   | 725.4101  | 0.0036  | 1.6542  | 148.03   | 93.69    | 117.33   | 174.01   | Yes |
| ARDAILDALENLTAEELK | 1.00 | 60.51  | 24.77 | 18.74  | 4 | 2272.2537 | 2272.2518   | 569.0702  | 0.0019  | 0.8347  | 264.25   | 239.78   | 385.55   | 291.33   | Yes |
| ARDAILDALENLTAEELK | 1.00 | 60.58  | 24.59 | 18.94  | 3 | 2272.2571 | 2272.2518   | 758.4245  | 0.0053  | 2.3294  | 0.00     | 40.25    | 50.43    | 28.25    | No  |
| ARDAILDALENLTAEELK | 1.00 | 72.57  | 24.59 | 21.39  | 3 | 2272.2589 | 2272.2518   | 758.4245  | 0.0071  | 3.1205  | 10.62    | 4.25     | 17.28    | 11.54    | No  |
| DAILDALENLTAEELKK  | 0.72 | 85.22  | 21.85 | 98.22  | 2 | 2317.3114 | 2317.3106   | 1159.6626 | 0.0008  | 0.3449  | 383.50   | 427.69   | 515.10   | 429.74   | Yes |
| DAILDALENLTAEELKK  | 0.72 | 97.75  | 21.85 | 110.75 | 2 | 2317.3114 | 2317.3106   | 1159.6626 | 0.0008  | 0.3449  | 308.21   | 395.52   | 421.70   | 442.83   | Yes |
| DAILDALENLTAEELKK  | 1.00 | 58.47  | 21.43 | 29.88  | 3 | 2317.3144 | 2317.3106   | 773.4441  | 0.0038  | 1.6377  | 1189.07  | 1526.66  | 1939.42  | 1798.43  | Yes |
| DAILDALENLTAEELKK  | 1.00 | 69.71  | 21.43 | 25.48  | 3 | 2317.3144 | 2317.3106   | 773.4441  | 0.0038  | 1.6377  | 2683.41  | 3781.13  | 4080.76  | 4082.91  | Yes |
| DAILDALENLTAEELKK  | 1.00 | 61.46  | 21.30 | 27.96  | 3 | 2317.3168 | 2317.3106   | 773.4441  | 0.0062  | 2.6720  | 10456.68 | 14190.90 | 13296.11 | 14398.27 | Yes |
| DAILDALENLTAEELKK  | 1.00 | 44.45  | 21.00 | 19.20  | 4 | 2317.3205 | 2317.3106   | 580.3349  | 0.0099  | 4.2648  | 14731.63 | 17623.23 | 20181.50 | 19203.31 | Yes |
| DAILDALENLTAEELKK  | 1.00 | 51.56  | 21.00 | 64.56  | 4 | 2317.3205 | 2317.3106   | 580.3349  | 0.0099  | 4.2648  | 14414.18 | 18376.86 | 20559.50 | 21375.69 | Yes |
| VLTDQYQAVR         | 1.00 | 63.62  | 28.18 | 27.14  | 2 | 1464.7684 | 1464.7694   | 733.3920  | -0.0010 | -0.6818 | 252.37   | 295.74   | 315.90   | 290.51   | Yes |
| VLTDQYQAVR         | 1.00 | 52.02  | 28.18 | 23.70  | 2 | 1464.7684 | 1464.7694   | 733.3920  | -0.0010 | -0.6818 | 593.44   | 776.95   | 840.75   | 827.71   | Yes |
| GALLSMDALDLTDK     | 1.00 | 104.60 | 28.02 | 28.94  | 2 | 1749.9442 | 1749.9426   | 875.9786  | 0.0016  | 0.9133  | 454.97   | 561.20   | 614.11   | 573.08   | Yes |
| GALLSMDALDLTDK     | 1.00 | 108.90 | 27.91 | 30.22  | 2 | 1749.9448 | 1749.9426   | 875.9786  | 0.0022  | 1.2557  | 4152.48  | 4469.41  | 4354.53  | 4333.62  | Yes |
| GALLSMDALDLTDK     | 1.00 | 40.22  | 27.95 | 29.31  | 3 | 1749.9451 | 1749.9426   | 584.3215  | 0.0025  | 1.4262  | 236.50   | 265.23   | 241.79   | 267.79   | Yes |
| GALLSMDALDLTDK     | 1.00 | 39.37  | 27.95 | 28.50  | 3 | 1749.9451 | 1749.9426   | 584.3215  | 0.0025  | 1.4262  | 121.40   | 195.40   | 168.28   | 168.28   | Yes |
| VTNVEWLLDALYGK     | 0.96 | 21.89  | 27.59 | 16.86  | 3 | 1763.9578 | 1763.9580   | 588.9933  | -0.0002 | -0.1132 | 51.15    | 46.52    | 46.36    | 60.17    | Yes |
| VTNVEWLLDALYGK     | 0.52 | 33.23  | 27.54 | 46.23  | 3 | 1763.9581 | 1763.9580   | 588.9933  | 0.0001  | 0.0566  | 77.83    | 92.63    | 108.12   | 94.69    | Yes |
| VTNVEWLLDALYGK     | 1.00 | 60.59  | 27.56 | 17.07  | 2 | 1763.9590 | 1763.9580   | 882.9863  | 0.0010  | 0.5663  | 0.00     | 10.67    | 3.54     | 6.24     | No  |
| VTNVEWLLDALYGK     | 0.72 | 70.35  | 27.57 | 83.35  | 2 | 1763.9592 | 1763.9580   | 882.9863  | 0.0012  | 0.6795  | 6.55     | 0.00     | 3.90     | 11.88    | No  |
| VTNVEWLLDALYGK     | 1.00 | 42.70  | 25.91 | 19.36  | 3 | 1908.0610 | 1908.0600   | 637.0273  | 0.0010  | 0.5233  | 17.57    | 13.45    | 8.00     | 22.10    | No  |
| DAILDALENLTAEELK   | 1.00 | 66.55  | 26.52 | 20.92  | 3 | 2045.1160 | 2045.1135   | 682.7118  | 0.0025  | 1.2206  | 75.47    | 118.14   | 74.51    | 119.37   | Yes |
| DAILDALENLTAEELK   | 1.00 | 54.81  | 26.51 | 20.43  | 3 | 2045.1163 | 2045.1135   | 682.7118  | 0.0028  | 1.3671  | 60.88    | 71.28    | 53.82    | 75.24    | Yes |
| DAILDALENLTAEELKK  | 1.00 | 65.16  | 24.42 | 20.20  | 3 | 2173.2115 | 2173.2085   | 725.4101  | 0.0030  | 1.3785  | 61.20    | 51.70    | 77.36    | 86.46    | Yes |
| ARDAILDALENLTAEELK | 1.00 | 62.91  | 24.84 | 18.43  | 3 | 2272.2532 | 2272.2518   | 758.4245  | 0.0014  | 0.6153  | 358.16   | 193.31   | 391.71   | 393.68   | Yes |
| ARDAILDALENLTAEELK | 1.00 | 52.22  | 24.84 | 18.46  | 3 | 2272.2532 | 2272.2518   | 758.4245  | 0.0014  | 0.6153  | 129.74   | 173.71   | 237.33   | 210.48   | Yes |
| ARDAILDALENLTAEELK | 1.00 | 51.02  | 24.84 | 64.02  | 4 | 2272.2533 | 2272.2518   | 569.0702  | 0.0015  | 0.6590  | 26.19    | 30.20    | 57.37    | 29.53    | No  |
| DAILDALENLTAEELKK  | 0.72 | 81.92  | 21.85 | 94.92  | 2 | 2317.3114 | 2317.3106   | 1159.6626 | 0.0008  | 0.3449  | 122.63   | 143.41   | 170.57   | 188.25   | Yes |
| DAILDALENLTAEELKK  | 0.72 | 76.29  | 21.85 | 89.29  | 2 | 2317.3114 | 2317.3106   | 1159.6626 | 0.0008  | 0.3449  | 89.52    | 120.44   | 98.13    | 135.01   | Yes |
| DAILDALENLTAEELKK  | 1.00 | 69.72  | 21.55 | 29.66  | 3 | 2317.3138 | 2317.3106   | 773.4441  | 0.0032  | 1.3791  | 4846.99  | 6093.65  | 7169.01  | 6529.91  | Yes |
| DAILDALENLTAEELKK  | 1.00 | 62.77  | 21.49 | 30.06  | 3 | 2317.3147 | 2317.3106   | 773.4441  | 0.0041  | 1.7670  | 9266.52  | 10283.56 | 13689.66 | 11854.84 | Yes |
| DAILDALENLTAEELKK  | 1.00 | 55.50  | 21.43 | 17.31  | 4 | 2317.3157 | 2317.3106   | 580.3349  | 0.0051  | 2.1970  | 5268.90  | 5323.42  | 7848.31  | 7106.19  | Yes |
| DAILDALENLTAEELKK  | 1.00 | 47.66  | 21.43 | 20.30  | 4 | 2317.3161 | 2317.3106   | 580.3349  | 0.0055  | 2.3693  | 4287.21  | 5550.52  | 5791.31  | 6237.46  | Yes |
| VLTDQYQAVR         | 1.00 | 65.01  | 28.09 | 28.89  | 2 | 1464.7776 | 1464.7694   | 733.3920  | 0.0082  | 5.5904  | 315.94   | 309.73   | 404.86   | 425.96   | Yes |
| VLTDQYQAVR         | 1.00 | 64.58  | 28.20 | 28.58  | 2 | 1464.7784 | 1464.7694   | 733.3920  | 0.0090  | 6.1358  | 1434.86  | 1755.08  | 1798.43  | 1855.72  | Yes |
| GALLSMDALDLTDK     | 1.00 | 93.52  | 27.94 | 25.61  | 2 | 1749.9434 | 1749.9426   | 875.9786  | 0.0008  | 0.4566  | 377.90   | 393.25   | 519.36   | 577.94   | Yes |
| GALLSMDALDLTDK     | 1.00 | 37.77  | 27.90 | 15.85  | 3 | 1749.9442 | 1749.9426   | 584.3215  | 0.0016  | 0.9127  | 13.84    | 7.85     | 18.56    | 6.20     | No  |
| GALLSMDALDLTDK     | 1.00 | 86.14  | 27.91 | 27.20  | 2 | 1749.9448 | 1749.9426   | 875.9786  | 0.0022  | 1.2557  | 1099.49  | 865.53   | 1106.85  | 1075.47  | Yes |
| GALLSMDALDLTDK     | 1.00 | 35.43  | 27.99 | 23.93  | 3 | 1749.9454 | 1749.9426   | 584.3215  | 0.0028  | 1.5973  | 17.01    | 26.03    | 9.18     | 12.22    | No  |
| VTNVEWLLDALYGK     | 1.00 | 71.47  | 27.62 | 21.30  | 2 | 1763.9598 | 1763.9580   | 882.9863  | 0.0018  | 1.0193  | 133.53   | 177.28   | 164.77   | 210.60   | Yes |
| VTNVEWLLDALYGK     | 1.00 | 72.15  | 27.62 | 21.54  | 2 | 1763.9598 | 1763.9580   | 882.9863  | 0.0018  | 1.0193  | 63.04    | 54.82    | 64.35    | 83.86    | Yes |
| VTNVEWLLDALYGK     | 0.56 | 73.24  | 27.61 | 86.24  | 2 | 1763.9602 | 1763.9580   | 882.9863  | 0.0022  | 1.2458  | 6.41     | 5.15     | 6.78     | 1.41     | No  |
| VTNVEWLLDALYGK     | 1.00 | 39.87  | 26.13 | 25.66  | 3 | 1908.0598 | 1908.0600   | 637.0273  | -0.0002 | -0.1047 | 40.29    | 45.58    | 48.77    | 40.24    | Yes |
| VTNVEWLLDALYGK     | 1.00 | 33.95  | 26.06 | 20.66  | 3 | 1908.0607 | 1908.0600   | 637.0273  | 0.0007  | 0.3663  | 22.28    | 24.59    | 28.96    | 25.29    | No  |
| VTNVEWLLDALYGK     | 1.00 | 36.03  | 25.99 | 24.28  | 3 | 1908.0619 | 1908.0600   | 637.0273  | 0.0019  | 0.9942  | 19.11    | 18.42    | 21.03    | 25.40    | No  |
| VTNVEWLLDALYGK     | 1.00 | 38.19  | 26.09 | 22.55  | 3 | 1908.0625 | 1908.0600   | 637.0273  | 0.0025  | 1.3082  | 51.80    | 38.25    | 33.67    | 27.58    | No  |
| DAILDALENLTAEELK   | 1.00 | 58.59  | 26.58 | 20.91  | 3 | 2045.1157 | 2045.1135   | 682.7118  | 0.0022  | 1.0741  | 45.04    | 42.75    | 51.61    | 42.31    | Yes |
| DAILDALENLTAEELK   | 1.00 | 92.57  | 26.52 | 27.79  | 3 | 2045.1160 | 2045.1135   | 682.7118  | 0.0025  | 1.2206  | 23.33    | 40.80    | 46.78    | 32.55    | No  |
| DAILDALENLTAEELKK  | 1.00 | 83.34  | 24.41 | 18.23  | 3 | 2173.2121 | 2173.2085   | 725.4101  | 0.0036  | 1.6542  | 5.72     | 0.00     | 9.26     | 9.21     | No  |
| ARDAILDALENLTAEELK | 1.00 | 68.95  | 24.84 | 18.13  | 3 | 2272.2529 | 2272.2518   | 758.4245  | 0.0011  | 0.4835  | 35.93    | 21.66    | 40.82    | 37.14    | No  |
| ARDAILDALENLTAEELK | 1.00 | 46.38  | 24.79 | 16.01  | 3 | 2272.2553 | 2272.2518   | 758.4245  | 0.0035  | 1.5383  | 20.06    | 8.00     | 16.30    | 12.89    | No  |
| DAILDALENLTAEELKK  | 1.00 | 59.86  | 21.64 | 17.92  | 4 | 2317.3133 | 2317.3106   | 580.3349  | 0.0027  | 1.1631  | 604.76   | 650.09   | 798.70   | 727.05   | Yes |
| DAILDALENLTAEELKK  | 1.00 | 59.21  | 21.49 | 22.08  | 3 | 2317.3147 | 2317.3106   | 773.4441  | 0.0041  | 1.7670  | 2981.60  | 3226.66  | 3414.05  | 3208.38  | Yes |
| GALLSMDALDLTDK     | 1.00 | 89.18  | 27.88 | 29.98  | 2 | 1749.9436 | 1749.9426   | 875.9786  | 0.0010  | 0.5708  | 185.13   | 197.06   | 223.83   | 209.25   | Yes |
| GALLSMDALDLTDK     | 1.00 | 87.58  | 27.90 | 28.74  | 2 | 1749.9440 | 1749.9426   | 875.9786  | 0.0014  | 0.7991  | 165.06   | 179.59   | 199.79   | 161.08   | Yes |
| GALLSMDALDLTDK     | 0.99 | 27.75  | 28.03 | 19.63  | 3 | 1749.9445 | 1749.9426   | 584.3215  | 0.0019  | 1.0839  | 16.04    | 11.59    | 5.06     | 13.07    | No  |
| GALLSMDALDLTDK     | 0.99 | 29.03  | 27.91 | 18.98  | 3 | 1749.9448 | 1749.9426   | 584.3215  | 0.0022  | 1.2550  | 9.27     | 4.61     | 3.88     | 1.44     | No  |
| VTNVEWLLDALYGK     | 1.00 | 71.44  | 27.47 | 19.61  | 2 | 1763.9596 | 1763.9580   | 882.9863  | 0.0016  | 0.9060  | 165.34   | 185.51   | 231.04   | 394.05   | Yes |
| VTNVEWLLDALYGK     | 1.00 | 70.23  | 27.63 | 23.02  | 2 | 1763.9612 | 1763.9580   | 882.9863  | 0.0032  | 1.8120  | 68.70    | 57.73    | 56.17    | 100.53   | Yes |
| VTNVEWLLDALYGK     | 1.00 | 35.02  | 25.91 | 16.41  | 3 | 1908.0610 | 1908.0600   | 637.0273  | 0.0010  | 0.5233  | 42.26    | 37.51    | 39.87    | 33.08    | Yes |
| VTNVEWLLDALYGK     | 0.96 | 20.48  | 25.99 | 16.39  | 3 | 1908.0616 | 1908.0600   | 637.0273  | 0.0016  | 0.8372  | 44.53    | 29.30    | 50.91    | 36.36    | No  |
| VTNVEWLLDALYGK     | 1.00 | 37.95  | 26.00 | 20.08  | 3 | 1908.0622 | 1908.0600</ |           |         |         |          |          |          |          |     |

|                               |      |       |       |       |   |           |           |          |         |         |         |         |         |         |     |
|-------------------------------|------|-------|-------|-------|---|-----------|-----------|----------|---------|---------|---------|---------|---------|---------|-----|
| DAILDALENLTAHEELKK            | 1.00 | 39.56 | 21.30 | 21.89 | 4 | 2317.3169 | 2317.3106 | 580.3349 | 0.0063  | 2.7139  | 47.09   | 59.66   | 77.04   | 57.21   | Yes |
| VTNVEWLLD DALY GK             | 1.00 | 79.01 | 27.54 | 23.33 | 2 | 1763.9630 | 1763.9580 | 882.9863 | 0.0050  | 2.8313  | 28.88   | 32.46   | 36.00   | 33.73   | No  |
| DAILDALENLTAHEELK             | 1.00 | 72.70 | 26.57 | 20.86 | 3 | 2045.1127 | 2045.1135 | 682.7118 | -0.0008 | -0.3906 | 23.41   | 55.14   | 62.24   | 59.33   | No  |
| DAILDALENLTAHEELK             | 1.00 | 68.89 | 26.64 | 22.07 | 3 | 2045.1142 | 2045.1135 | 682.7118 | 0.0007  | 0.3418  | 33.42   | 57.33   | 41.85   | 43.94   | Yes |
| DAILDALENLTAHEELKK            | 0.52 | 63.04 | 21.85 | 76.04 | 3 | 2317.3114 | 2317.3106 | 773.4441 | 0.0008  | 0.3448  | 137.83  | 169.99  | 196.29  | 230.08  | Yes |
| DAILDALENLTAHEELKK            | 1.00 | 56.25 | 21.37 | 20.87 | 3 | 2317.3165 | 2317.3106 | 773.4441 | 0.0059  | 2.5427  | 100.26  | 144.04  | 143.62  | 118.32  | Yes |
| DAILDALENLTAHEELK             | 1.00 | 61.14 | 26.51 | 20.03 | 3 | 2045.1163 | 2045.1135 | 682.7118 | 0.0028  | 1.3671  | 24.18   | 23.91   | 31.02   | 25.77   | No  |
| VTNVEWLLD DALY GK             | 0.52 | 47.81 | 26.12 | 60.81 | 3 | 1908.0604 | 1908.0600 | 637.0273 | 0.0004  | 0.2093  | 6.63    | 11.27   | 9.13    | 6.43    | No  |
| VTNVEWLLD DALY GK             | 1.00 | 62.88 | 25.99 | 38.07 | 3 | 1908.0631 | 1908.0600 | 637.0273 | 0.0031  | 1.6221  | 10.18   | 27.13   | 17.97   | 19.70   | No  |
| VTNVEWLLD DALY GK             | 1.00 | 43.45 | 25.99 | 21.60 | 3 | 1908.0634 | 1908.0600 | 637.0273 | 0.0034  | 1.7791  | 15.00   | 17.29   | 21.55   | 20.96   | No  |
| VTNVEWLLD DALY GK             | 1.00 | 46.73 | 26.05 | 27.97 | 3 | 1908.0637 | 1908.0600 | 637.0273 | 0.0037  | 1.9361  | 19.43   | 16.44   | 15.69   | 20.68   | No  |
| VTNVEWLLD DALY GK             | 1.00 | 43.18 | 25.79 | 29.79 | 3 | 1908.0661 | 1908.0600 | 637.0273 | 0.0061  | 3.1919  | 33.15   | 30.83   | 26.72   | 31.69   | No  |
| VTNVEWLLD DALY GK             | 1.00 | 47.90 | 27.66 | 26.26 | 3 | 1763.9611 | 1763.9580 | 588.9933 | 0.0031  | 1.7544  | 14.04   | 10.21   | 8.44    | 9.63    | No  |
| VTNVEWLLD DALY GK             | 1.00 | 56.85 | 27.63 | 25.39 | 3 | 1763.9644 | 1763.9580 | 588.9933 | 0.0064  | 3.6220  | 10.79   | 2.78    | 8.78    | 10.38   | No  |
| VTNVEWLLD DALY GK             | 1.00 | 42.76 | 26.03 | 20.70 | 3 | 1908.0574 | 1908.0600 | 637.0273 | -0.0026 | -1.3605 | 16.93   | 15.57   | 8.24    | 21.64   | No  |
| VTNVEWLLD DALY GK             | 1.00 | 40.79 | 26.03 | 18.40 | 3 | 1908.0574 | 1908.0600 | 637.0273 | -0.0026 | -1.3605 | 8.61    | 8.84    | 4.07    | 8.99    | No  |
| VTNVEWLLD DALY GK             | 1.00 | 49.06 | 26.06 | 17.25 | 3 | 1908.0607 | 1908.0600 | 637.0273 | 0.0007  | 0.3663  | 22.57   | 16.46   | 20.11   | 7.13    | No  |
| VTNVEWLLD DALY GK             | 0.98 | 23.67 | 26.04 | 17.50 | 3 | 1908.0613 | 1908.0600 | 637.0273 | 0.0013  | 0.6802  | 4.56    | 14.31   | 8.10    | 9.31    | No  |
| VTNVEWLLD DALY GK             | 1.00 | 54.42 | 26.09 | 43.05 | 3 | 1908.0625 | 1908.0600 | 637.0273 | 0.0025  | 1.3082  | 20.42   | 25.06   | 11.85   | 13.74   | No  |
| VTNVEWLLD DALY GK             | 1.00 | 47.38 | 26.09 | 27.29 | 3 | 1908.0625 | 1908.0600 | 637.0273 | 0.0025  | 1.3082  | 36.56   | 19.62   | 18.68   | 27.27   | No  |
| VTNVEWLLD DALY GK             | 1.00 | 47.40 | 25.99 | 34.34 | 3 | 1908.0634 | 1908.0600 | 637.0273 | 0.0034  | 1.7791  | 13.41   | 17.84   | 14.83   | 20.77   | No  |
| VTNVEWLLD DALY GK             | 1.00 | 55.36 | 26.05 | 28.01 | 3 | 1908.0637 | 1908.0600 | 637.0273 | 0.0037  | 1.9361  | 17.72   | 6.64    | 15.00   | 16.17   | No  |
| VTNVEWLLD DALY GK             | 1.00 | 36.05 | 26.02 | 26.37 | 3 | 1908.0640 | 1908.0600 | 637.0273 | 0.0040  | 2.0931  | 8.89    | 17.04   | 7.70    | 12.02   | No  |
| VTNVEWLLD DALY GK             | 1.00 | 36.66 | 25.95 | 18.58 | 3 | 1908.0643 | 1908.0600 | 637.0273 | 0.0043  | 2.2500  | 28.29   | 29.20   | 45.28   | 36.14   | No  |
| VTNVEWLLD DALY GK             | 0.88 | 22.53 | 26.00 | 21.46 | 3 | 1908.0652 | 1908.0600 | 637.0273 | 0.0052  | 2.7210  | 13.32   | 9.95    | 10.68   | 10.69   | No  |
| VTNVEWLLD DALY GK             | 1.00 | 45.01 | 25.79 | 27.86 | 3 | 1908.0664 | 1908.0600 | 637.0273 | 0.0064  | 3.3489  | 15.64   | 12.21   | 28.66   | 26.94   | No  |
| VTNVEWLLD DALY GK             | 1.00 | 40.15 | 25.79 | 24.88 | 3 | 1908.0664 | 1908.0600 | 637.0273 | 0.0064  | 3.3489  | 22.24   | 22.81   | 21.89   | 15.27   | No  |
| LLSVPLR                       | 0.97 | 27.66 | 18.06 | 30.41 | 2 | 940.6180  | 940.6191  | 471.3168 | -0.0011 | -1.1669 | 347.85  | 375.95  | 392.49  | 412.15  | Yes |
| VTNVEWLLD DALY GK             | 1.00 | 39.26 | 27.57 | 19.21 | 3 | 1763.9593 | 1763.9580 | 588.9933 | 0.0013  | 0.7357  | 8.67    | 1.70    | 4.21    | 5.08    | No  |
| VTNVEWLLD DALY GK             | 1.00 | 32.21 | 27.62 | 20.01 | 3 | 1763.9605 | 1763.9580 | 588.9933 | 0.0025  | 1.4148  | 291.31  | 173.24  | 187.96  | 252.36  | Yes |
| VTNVEWLLD DALY GK             | 1.00 | 77.68 | 27.67 | 28.79 | 2 | 1763.9606 | 1763.9580 | 882.9863 | 0.0026  | 1.4723  | 6.22    | 0.00    | 0.00    | 1.16    | No  |
| VTNVEWLLD DALY GK             | 1.00 | 47.63 | 26.12 | 19.16 | 3 | 1908.0592 | 1908.0600 | 637.0273 | -0.0008 | -0.4186 | 8.63    | 8.32    | 8.16    | 15.65   | No  |
| VTNVEWLLD DALY GK             | 1.00 | 39.77 | 26.06 | 17.02 | 3 | 1908.0607 | 1908.0600 | 637.0273 | 0.0007  | 0.3663  | 10.57   | 14.42   | 5.80    | 11.70   | No  |
| VTNVEWLLD DALY GK             | 1.00 | 46.96 | 26.04 | 34.23 | 3 | 1908.0613 | 1908.0600 | 637.0273 | 0.0013  | 0.6802  | 8.95    | 23.57   | 10.31   | 23.06   | No  |
| VTNVEWLLD DALY GK             | 0.91 | 28.73 | 25.99 | 35.42 | 3 | 1908.0616 | 1908.0600 | 637.0273 | 0.0016  | 0.8372  | 15.68   | 10.40   | 7.43    | 5.38    | No  |
| VTNVEWLLD DALY GK             | 1.00 | 39.26 | 25.99 | 28.68 | 3 | 1908.0619 | 1908.0600 | 637.0273 | 0.0019  | 0.9942  | 10.26   | 17.27   | 15.01   | 16.75   | No  |
| VTNVEWLLD DALY GK             | 0.99 | 26.03 | 26.00 | 16.84 | 3 | 1908.0622 | 1908.0600 | 637.0273 | 0.0022  | 1.1512  | 7.95    | 10.72   | 7.96    | 15.33   | No  |
| VTNVEWLLD DALY GK             | 1.00 | 55.55 | 26.00 | 28.21 | 3 | 1908.0622 | 1908.0600 | 637.0273 | 0.0022  | 1.1512  | 9.10    | 15.25   | 14.35   | 17.06   | No  |
| VTNVEWLLD DALY GK             | 1.00 | 68.11 | 26.03 | 31.22 | 2 | 1908.0624 | 1908.0600 | 955.0373 | 0.0024  | 1.2565  | 3084.68 | 3189.22 | 3882.07 | 3283.68 | Yes |
| VTNVEWLLD DALY GK             | 1.00 | 33.98 | 25.99 | 23.42 | 3 | 1908.0631 | 1908.0600 | 637.0273 | 0.0031  | 1.6221  | 9.02    | 13.83   | 14.22   | 10.23   | No  |
| VTNVEWLLD DALY GK             | 1.00 | 70.75 | 25.99 | 28.57 | 2 | 1908.0632 | 1908.0600 | 955.0373 | 0.0032  | 1.6753  | 5333.62 | 5554.79 | 8356.68 | 6820.41 | Yes |
| VTNVEWLLD DALY GK             | 0.99 | 28.29 | 25.99 | 16.25 | 3 | 1908.0634 | 1908.0600 | 637.0273 | 0.0034  | 1.7791  | 12.37   | 15.91   | 19.57   | 18.84   | No  |
| VTNVEWLLD DALY GK             | 1.00 | 52.15 | 25.99 | 26.24 | 3 | 1908.0634 | 1908.0600 | 637.0273 | 0.0034  | 1.7791  | 10.69   | 23.66   | 10.16   | 15.30   | No  |
| VTNVEWLLD DALY GK             | 1.00 | 40.70 | 26.05 | 32.19 | 3 | 1908.0637 | 1908.0600 | 637.0273 | 0.0037  | 1.9361  | 11.30   | 13.40   | 11.81   | 18.00   | No  |
| VTNVEWLLD DALY GK             | 1.00 | 45.62 | 25.97 | 34.92 | 3 | 1908.0646 | 1908.0600 | 637.0273 | 0.0046  | 2.4070  | 3341.97 | 4335.40 | 6629.74 | 6674.36 | Yes |
| VTNVEWLLD DALY GK             | 1.00 | 45.51 | 25.74 | 34.04 | 3 | 1908.0673 | 1908.0600 | 637.0273 | 0.0073  | 3.8198  | 13.66   | 21.84   | 18.32   | 20.42   | No  |
| VTNVEWLLD DALY GK             | 1.00 | 56.11 | 25.83 | 30.08 | 3 | 1908.0682 | 1908.0600 | 637.0273 | 0.0082  | 4.2907  | 1495.16 | 1987.46 | 1925.59 | 1711.70 | Yes |
| VTNVEWLLD DALY GK             | 1.00 | 33.27 | 27.48 | 17.66 | 3 | 1763.9596 | 1763.9580 | 588.9933 | 0.0016  | 0.9055  | 40.72   | 15.37   | 22.95   | 42.33   | No  |
| VTNVEWLLD DALY GK             | 1.00 | 68.36 | 27.47 | 25.98 | 2 | 1763.9622 | 1763.9580 | 882.9863 | 0.0042  | 2.3783  | 0.00    | 1.42    | 3.19    | 2.53    | No  |
| VTNVEWLLD DALY GK             | 1.00 | 44.54 | 27.57 | 23.10 | 3 | 1763.9635 | 1763.9580 | 588.9933 | 0.0055  | 3.1126  | 7.77    | 6.58    | 8.91    | 8.67    | No  |
| VTNVEWLLD DALY GK             | 1.00 | 72.86 | 27.58 | 36.91 | 2 | 1763.9656 | 1763.9580 | 882.9863 | 0.0076  | 4.3036  | 3.19    | 1.06    | 0.00    | 0.00    | No  |
| VTNVEWLLD DALY GK             | 0.99 | 26.96 | 26.13 | 18.27 | 3 | 1908.0601 | 1908.0600 | 637.0273 | 0.0001  | 0.0523  | 16.25   | 18.22   | 11.97   | 10.36   | No  |
| VTNVEWLLD DALY GK             | 1.00 | 44.84 | 26.13 | 21.87 | 3 | 1908.0601 | 1908.0600 | 637.0273 | 0.0001  | 0.0523  | 16.12   | 22.66   | 11.85   | 13.30   | No  |
| VTNVEWLLD DALY GK             | 1.00 | 44.32 | 26.06 | 17.98 | 3 | 1908.0607 | 1908.0600 | 637.0273 | 0.0007  | 0.3663  | 13.58   | 14.26   | 10.57   | 14.20   | No  |
| VTNVEWLLD DALY GK             | 1.00 | 46.40 | 26.00 | 25.35 | 3 | 1908.0622 | 1908.0600 | 637.0273 | 0.0022  | 1.1512  | 8.67    | 9.75    | 3.11    | 16.72   | No  |
| VTNVEWLLD DALY GK             | 1.00 | 42.21 | 26.09 | 26.20 | 3 | 1908.0625 | 1908.0600 | 637.0273 | 0.0025  | 1.3082  | 17.63   | 24.00   | 20.08   | 10.10   | No  |
| VTNVEWLLD DALY GK             | 1.00 | 61.18 | 26.09 | 34.68 | 3 | 1908.0625 | 1908.0600 | 637.0273 | 0.0025  | 1.3082  | 8.87    | 17.36   | 8.61    | 9.21    | No  |
| VTNVEWLLD DALY GK             | 1.00 | 68.45 | 26.09 | 30.35 | 2 | 1908.0626 | 1908.0600 | 955.0373 | 0.0026  | 1.3612  | 2453.80 | 3066.30 | 3509.50 | 3120.48 | Yes |
| VTNVEWLLD DALY GK             | 1.00 | 51.33 | 25.99 | 33.06 | 3 | 1908.0631 | 1908.0600 | 637.0273 | 0.0031  | 1.6221  | 15.39   | 22.83   | 13.04   | 9.02    | No  |
| VTNVEWLLD DALY GK             | 1.00 | 61.41 | 26.05 | 30.89 | 3 | 1908.0637 | 1908.0600 | 637.0273 | 0.0037  | 1.9361  | 2898.83 | 3127.61 | 3020.84 | 3549.84 | Yes |
| VTNVEWLLD DALY GK             | 1.00 | 59.05 | 26.02 | 35.82 | 3 | 1908.0640 | 1908.0600 | 637.0273 | 0.0040  | 2.0931  | 910.88  | 1387.72 | 1551.81 | 1584.25 | Yes |
| VTNVEWLLD DALY GK             | 1.00 | 61.53 | 26.02 | 41.76 | 3 | 1908.0640 | 1908.0600 | 637.0273 | 0.0040  | 2.0931  | 14.41   | 14.38   | 17.35   | 16.70   | No  |
| VTNVEWLLD DALY GK             | 1.00 | 61.56 | 26.02 | 39.61 | 3 | 1908.0640 | 1908.0600 | 637.0273 | 0.0040  | 2.0931  | 14.33   | 23.07   | 20.52   | 20.55   | No  |
| VTNVEWLLD DALY GK             | 1.00 | 45.80 | 26.02 | 34.07 | 3 | 1908.0640 | 1908.0600 | 637.0273 | 0.0040  | 2.0931  | 19.84   | 14.45   | 20.25   | 11.08   | No  |
| VTNVEWLLD DALY GK             | 1.00 | 67.73 | 26.02 | 27.91 | 2 | 1908.0640 | 1908.0600 | 955.0373 | 0.0040  | 2.0942  | 557.15  | 747.92  | 886.98  | 1113.41 | Yes |
| VTNVEWLLD DALY GK             | 0.94 | 24.79 | 25.88 | 15.86 | 3 | 1908.0655 | 1908.0600 | 637.0273 | 0.0055  | 2.8779  | 5.55    | 20.67   | 4.35    | 7.84    | No  |
| VTNVEWLLD DALY GK             | 0.84 | 36.09 | 25.74 | 36.36 | 3 | 1908.0673 | 1908.0600 | 637.0273 | 0.0073  | 3.8198  | 19.00   | 9.80    | 6.17    | 8.69    | No  |
| VTNVEWLLD DALY GK VLIDEQYQAVR | 1.00 | 36.74 | 23.91 | 49.74 | 4 | 3210.7221 | 3210.7168 | 803.6865 | 0.0053  | 1.6487  | 5.23    | 9.72    | 10.49   | 18.88   | No  |
| DLLLQALR                      | 1.00 | 34.93 | 21.49 | 24.44 | 2 | 1084.6728 | 1084.6726 | 543.3436 | 0.0002  | 0.1840  | 3038.37 | 2326.44 | 2705.27 | 3260.66 | Yes |
| VTNVEWLLD DALY GK             | 0.99 | 29.57 | 27.66 | 17.83 | 3 | 1763.9608 | 1763.9580 | 588.9933 | 0.0028  | 1.5846  | 13.79   | 15.69   | 11.05   | 10.53   | No  |
| VTNVEWLLD DALY GK             | 1.00 | 61.93 | 27.56 | 25.36 | 2 | 1763.9628 | 1763.9580 | 882.9863 | 0.0048  | 2.7180  | 0.00    | 0.00    | 5.68    | 2.39    | No  |
| VTNVEWLLD DALY GK             | 0.60 | 13.17 | 26.09 | 14.13 | 3 | 1908.0625 | 1908.0600 | 637.0273 | 0.0025  |         |         |         |         |         |     |

|                                   |      |        |       |        |   |           |           |           |         |         |        |        |         |        |     |
|-----------------------------------|------|--------|-------|--------|---|-----------|-----------|-----------|---------|---------|--------|--------|---------|--------|-----|
| VTNVEWLLDALYGVKVLTDQYQAVR         | 1.00 | 46.91  | 23.96 | 17.02  | 4 | 3210.7205 | 3210.7168 | 803.6865  | 0.0037  | 1.1509  | 6.01   | 10.18  | 17.70   | 11.87  | No  |
| GALLSMDALDLTDKLVSFYLETYGAELTANVLR | 1.00 | 44.81  | 22.62 | 18.78  | 4 | 3890.0605 | 3890.0630 | 973.5230  | -0.0025 | -0.6420 | 3.49   | 7.18   | 6.99    | 3.72   | No  |
| VTNVEWLLDALYGVK                   | 0.97 | 24.12  | 27.62 | 17.31  | 3 | 1763.9605 | 1763.9580 | 588.9933  | 0.0025  | 1.4148  | 9.29   | 6.52   | 10.14   | 10.15  | No  |
| VTNVEWLLDALYGVK                   | 1.00 | 34.90  | 27.47 | 17.06  | 3 | 1763.9626 | 1763.9580 | 588.9933  | 0.0046  | 2.6033  | 6.62   | 8.19   | 10.49   | 6.11   | No  |
| VTNVEWLLDALYGVK                   | 1.00 | 99.79  | 27.22 | 31.47  | 2 | 1763.9728 | 1763.9580 | 882.9863  | 0.0148  | 8.3806  | 3.43   | 3.84   | 4.16    | 3.98   | No  |
| VTNVEWLLDALYGVK                   | 1.00 | 56.51  | 26.00 | 31.85  | 3 | 1908.0622 | 1908.0600 | 637.0273  | 0.0022  | 1.1512  | 301.18 | 334.44 | 386.70  | 491.56 | Yes |
| VTNVEWLLDALYGVK                   | 1.00 | 74.04  | 26.05 | 29.43  | 2 | 1908.0636 | 1908.0600 | 955.0373  | 0.0036  | 1.8847  | 56.75  | 53.55  | 68.93   | 79.09  | Yes |
| VTNVEWLLDALYGVK                   | 1.00 | 73.11  | 25.85 | 36.49  | 2 | 1908.0658 | 1908.0600 | 955.0373  | 0.0058  | 3.0365  | 24.20  | 21.96  | 34.88   | 18.08  | No  |
| LVSFYLETYGAELTANVLR               | 1.00 | 144.29 | 26.75 | 28.40  | 2 | 2302.2294 | 2302.2331 | 1152.1238 | -0.0037 | -1.6057 | 3.23   | 6.33   | 1.58    | 7.08   | No  |
| GALLSMDALDLTDKLVSFYLETYGAELTANVLR | 1.00 | 45.41  | 22.43 | 58.41  | 4 | 3890.0617 | 3890.0630 | 973.5230  | -0.0013 | -0.3338 | 147.30 | 144.46 | 151.23  | 272.71 | Yes |
| GALLSMDALDLTDKLVSFYLETYGAELTANVLR | 1.00 | 66.95  | 22.43 | 79.95  | 4 | 3890.0621 | 3890.0630 | 973.5230  | -0.0009 | -0.2311 | 16.13  | 4.51   | 29.33   | 24.35  | No  |
| GALLSMDALDLTDKLVSFYLETYGAELTANVLR | 1.00 | 73.76  | 23.12 | 17.90  | 3 | 3906.0562 | 3906.0580 | 1303.0266 | -0.0018 | -0.4605 | 0.00   | 0.00   | 0.00    | 2.17   | No  |
| GALLSMDALDLTDKLVSFYLETYGAELTANVLR | 1.00 | 48.75  | 22.90 | 61.75  | 4 | 3906.0597 | 3906.0580 | 977.5218  | 0.0017  | 0.4348  | 0.00   | 18.49  | 22.79   | 0.00   | No  |
| GALLSMDALDLTDKLVSFYLETYGAELTANVLR | 1.00 | 52.53  | 22.90 | 65.53  | 4 | 3906.0601 | 3906.0580 | 977.5218  | 0.0021  | 0.5371  | 0.00   | 0.00   | 0.00    | 16.84  | No  |
| AEPTNPSKMR                        | 0.99 | 35.22  | 27.70 | 23.09  | 3 | 1273.6576 | 1273.6570 | 425.5596  | 0.0006  | 0.4700  | 13.49  | 10.59  | 20.08   | 13.09  | No  |
| AEPTNPSKMR                        | 1.00 | 45.55  | 27.70 | 22.92  | 3 | 1273.6576 | 1273.6570 | 425.5596  | 0.0006  | 0.4700  | 10.20  | 16.73  | 12.30   | 12.05  | No  |
| VTNVEWLLDALYGVK                   | 1.00 | 89.46  | 27.54 | 25.98  | 2 | 1763.9630 | 1763.9580 | 882.9863  | 0.0050  | 2.8313  | 39.02  | 32.50  | 20.44   | 32.10  | No  |
| VTNVEWLLDALYGVK                   | 1.00 | 91.74  | 27.67 | 22.91  | 2 | 1763.9646 | 1763.9580 | 882.9863  | 0.0066  | 3.7373  | 30.69  | 27.19  | 31.00   | 33.36  | No  |
| VTNVEWLLDALYGVK                   | 1.00 | 57.10  | 25.97 | 36.00  | 3 | 1908.0646 | 1908.0600 | 637.0273  | 0.0046  | 2.4070  | 220.74 | 229.15 | 296.49  | 255.17 | Yes |
| VTNVEWLLDALYGVK                   | 1.00 | 87.71  | 25.79 | 42.92  | 2 | 1908.0660 | 1908.0600 | 955.0373  | 0.0060  | 3.1412  | 92.57  | 71.88  | 134.31  | 94.99  | Yes |
| VTNVEWLLDALYGVK                   | 1.00 | 72.54  | 25.79 | 31.56  | 2 | 1908.0666 | 1908.0600 | 955.0373  | 0.0066  | 3.4554  | 78.71  | 108.20 | 66.52   | 123.39 | Yes |
| LVSFYLETYGAELTANVLR               | 1.00 | 109.15 | 26.49 | 24.78  | 2 | 2302.2334 | 2302.2331 | 1152.1238 | 0.0003  | 0.1302  | 85.28  | 107.08 | 128.90  | 84.67  | Yes |
| LVSFYLETYGAELTANVLR               | 0.80 | 99.71  | 26.49 | 112.71 | 2 | 2302.2334 | 2302.2331 | 1152.1238 | 0.0003  | 0.1302  | 113.15 | 202.92 | 137.52  | 187.54 | Yes |
| LVSFYLETYGAELTANVLR               | 1.00 | 45.24  | 26.24 | 22.38  | 3 | 2302.2379 | 2302.2331 | 768.4183  | 0.0048  | 2.0822  | 0.00   | 8.23   | 0.00    | 0.00   | No  |
| LVSFYLETYGAELTANVLR               | 1.00 | 58.57  | 26.06 | 21.58  | 3 | 2302.2388 | 2302.2331 | 768.4183  | 0.0057  | 2.4726  | 0.00   | 9.12   | 30.40   | 0.00   | No  |
| GALLSMDALDLTDKLVSFYLETYGAELTANVLR | 1.00 | 51.43  | 22.38 | 64.43  | 4 | 3890.0689 | 3890.0630 | 973.5230  | 0.0059  | 1.5151  | 9.80   | 16.84  | 0.00    | 33.17  | No  |
| GALLSMDALDLTDKLVSFYLETYGAELTANVLR | 1.00 | 53.95  | 22.86 | 66.95  | 4 | 3906.0609 | 3906.0580 | 977.5218  | 0.0029  | 0.7417  | 5.77   | 3.73   | 0.00    | 0.00   | No  |
| GALLSMDALDLTDKLVSFYLETYGAELTANVLR | 1.00 | 56.48  | 22.81 | 69.48  | 4 | 3906.0613 | 3906.0580 | 977.5218  | 0.0033  | 0.8440  | 3.37   | 1.78   | 4.38    | 1.30   | No  |
| VTNVEWLLDALYGVK                   | 1.00 | 87.90  | 27.54 | 20.38  | 2 | 1763.9630 | 1763.9580 | 882.9863  | 0.0050  | 2.8313  | 38.92  | 22.74  | 25.58   | 21.10  | No  |
| VTNVEWLLDALYGVK                   | 1.00 | 56.51  | 26.09 | 34.35  | 3 | 1908.0628 | 1908.0600 | 637.0273  | 0.0028  | 1.4651  | 41.43  | 42.15  | 35.36   | 50.31  | Yes |
| VTNVEWLLDALYGVK                   | 1.00 | 44.20  | 26.05 | 21.87  | 3 | 1908.0637 | 1908.0600 | 637.0273  | 0.0037  | 1.9361  | 2.92   | 1.62   | 3.68    | 5.23   | No  |
| VTNVEWLLDALYGVK                   | 1.00 | 81.03  | 25.79 | 28.77  | 2 | 1908.0660 | 1908.0600 | 955.0373  | 0.0060  | 3.1412  | 53.40  | 66.35  | 75.20   | 83.30  | Yes |
| VTNVEWLLDALYGVK                   | 1.00 | 68.56  | 25.79 | 30.69  | 2 | 1908.0664 | 1908.0600 | 955.0373  | 0.0064  | 3.3506  | 57.34  | 78.69  | 101.52  | 90.64  | Yes |
| LVSFYLETYGAELTANVLR               | 1.00 | 104.48 | 26.37 | 21.97  | 2 | 2302.2354 | 2302.2331 | 1152.1238 | 0.0023  | 0.9982  | 73.73  | 107.69 | 187.04  | 115.69 | Yes |
| LVSFYLETYGAELTANVLR               | 1.00 | 119.23 | 26.37 | 22.84  | 2 | 2302.2354 | 2302.2331 | 1152.1238 | 0.0023  | 0.9982  | 16.31  | 31.08  | 28.91   | 20.61  | No  |
| LVSFYLETYGAELTANVLR               | 1.00 | 78.63  | 26.37 | 19.36  | 2 | 2302.2354 | 2302.2331 | 1152.1238 | 0.0023  | 0.9982  | 239.57 | 364.40 | 427.33  | 295.09 | Yes |
| LVSFYLETYGAELTANVLR               | 1.00 | 131.89 | 26.26 | 26.31  | 2 | 2302.2374 | 2302.2331 | 1152.1238 | 0.0043  | 1.8661  | 31.45  | 24.22  | 34.62   | 33.38  | No  |
| LVSFYLETYGAELTANVLR               | 1.00 | 56.96  | 25.97 | 19.85  | 3 | 2302.2412 | 2302.2331 | 768.4183  | 0.0081  | 3.5137  | 327.19 | 567.36 | 715.40  | 613.12 | Yes |
| GALLSMDALDLTDKLVSFYLETYGAELTANVLR | 1.00 | 56.10  | 23.46 | 39.80  | 4 | 3745.9677 | 3745.9610 | 937.4975  | 0.0067  | 1.7867  | 3.99   | 0.00   | 4.03    | 1.25   | No  |
| GALLSMDALDLTDKLVSFYLETYGAELTANVLR | 1.00 | 56.33  | 22.33 | 69.33  | 4 | 3890.0777 | 3890.0630 | 973.5230  | 0.0147  | 3.7749  | 625.19 | 470.23 | 1040.20 | 354.48 | No  |
| GALLSMDALDLTDKLVSFYLETYGAELTANVLR | 1.00 | 51.31  | 22.83 | 64.31  | 4 | 3906.0625 | 3906.0580 | 977.5218  | 0.0045  | 1.1509  | 4.08   | 0.00   | 0.00    | 4.22   | No  |
| GALLSMDALDLTDKLVSFYLETYGAELTANVLR | 1.00 | 60.57  | 22.79 | 16.96  | 4 | 3906.0633 | 3906.0580 | 977.5218  | 0.0053  | 1.3555  | 0.00   | 3.48   | 9.08    | 7.02   | No  |
| VTNVEWLLDALYGVK                   | 1.00 | 90.07  | 27.54 | 21.21  | 2 | 1763.9630 | 1763.9580 | 882.9863  | 0.0050  | 2.8313  | 21.47  | 14.21  | 13.24   | 15.68  | No  |
| VTNVEWLLDALYGVK                   | 1.00 | 82.31  | 27.67 | 23.65  | 2 | 1763.9646 | 1763.9580 | 882.9863  | 0.0066  | 3.7373  | 35.20  | 19.95  | 24.12   | 42.30  | No  |
| VTNVEWLLDALYGVK                   | 1.00 | 47.53  | 25.99 | 27.91  | 3 | 1908.0634 | 1908.0600 | 637.0273  | 0.0034  | 1.7791  | 244.13 | 293.16 | 314.42  | 333.22 | Yes |
| VTNVEWLLDALYGVK                   | 1.00 | 44.93  | 26.00 | 26.36  | 3 | 1908.0652 | 1908.0600 | 637.0273  | 0.0052  | 2.7210  | 152.50 | 159.38 | 181.98  | 217.79 | Yes |
| LVSFYLETYGAELTANVLR               | 1.00 | 114.10 | 26.37 | 22.47  | 2 | 2302.2354 | 2302.2331 | 1152.1238 | 0.0023  | 0.9982  | 101.79 | 115.39 | 123.16  | 117.83 | Yes |
| LVSFYLETYGAELTANVLR               | 0.56 | 104.55 | 26.37 | 117.55 | 2 | 2302.2354 | 2302.2331 | 1152.1238 | 0.0023  | 0.9982  | 65.44  | 95.32  | 94.18   | 117.11 | Yes |
| LVSFYLETYGAELTANVLR               | 1.00 | 62.62  | 26.33 | 20.78  | 3 | 2302.2364 | 2302.2331 | 768.4183  | 0.0033  | 1.4315  | 4.07   | 0.00   | 0.00    | 7.23   | No  |
| LVSFYLETYGAELTANVLR               | 1.00 | 50.96  | 26.28 | 18.89  | 3 | 2302.2370 | 2302.2331 | 768.4183  | 0.0039  | 1.6918  | 0.00   | 16.02  | 0.00    | 12.17  | No  |
| AEPTNPSK                          | 1.00 | 41.16  | 27.36 | 23.98  | 2 | 1130.6172 | 1130.6175 | 566.3160  | -0.0003 | -0.2649 | 100.01 | 141.19 | 110.66  | 133.48 | Yes |
| AEPTNPSKMR                        | 0.76 | 23.68  | 27.70 | 17.77  | 3 | 1273.6576 | 1273.6570 | 425.5596  | 0.0006  | 0.4700  | 8.79   | 0.00   | 10.95   | 8.75   | No  |
| VLTDQYQAVR                        | 1.00 | 43.88  | 28.38 | 23.61  | 2 | 1464.7706 | 1464.7694 | 733.3920  | 0.0012  | 0.8181  | 31.50  | 40.87  | 45.81   | 42.72  | Yes |
| VTNVEWLLDALYGVK                   | 1.00 | 52.14  | 26.00 | 26.21  | 3 | 1908.0622 | 1908.0600 | 637.0273  | 0.0022  | 1.1512  | 5.04   | 18.84  | 6.91    | 15.29  | No  |
| VTNVEWLLDALYGVK                   | 1.00 | 62.98  | 26.02 | 38.24  | 3 | 1908.0640 | 1908.0600 | 637.0273  | 0.0040  | 2.0931  | 15.66  | 24.19  | 13.92   | 20.32  | No  |
| AEPTNPSK                          | 1.00 | 54.78  | 27.38 | 24.03  | 2 | 1130.6168 | 1130.6175 | 566.3160  | -0.0007 | -0.6180 | 41.70  | 59.25  | 80.62   | 60.72  | Yes |
| AEPTNPSK                          | 1.00 | 52.69  | 27.36 | 23.09  | 2 | 1130.6172 | 1130.6175 | 566.3160  | -0.0003 | -0.2649 | 39.46  | 61.79  | 45.57   | 54.40  | Yes |
| VTNVEWLLDALYGVK                   | 1.00 | 42.74  | 26.13 | 22.51  | 3 | 1908.0595 | 1908.0600 | 637.0273  | -0.0005 | -0.2616 | 16.97  | 21.86  | 24.02   | 17.86  | No  |
| VTNVEWLLDALYGVK                   | 1.00 | 48.09  | 25.99 | 33.27  | 3 | 1908.0634 | 1908.0600 | 637.0273  | 0.0034  | 1.7791  | 38.60  | 23.96  | 28.67   | 35.22  | No  |
| LLSVPLR                           | 0.96 | 18.74  | 18.06 | 19.21  | 2 | 940.6202  | 940.6191  | 471.3168  | 0.0011  | 1.1669  | 14.94  | 26.66  | 20.91   | 11.23  | No  |
| LLSVPLR                           | 0.72 | 15.57  | 18.06 | 28.57  | 2 | 940.6204  | 940.6191  | 471.3168  | 0.0013  | 1.3791  | 35.13  | 24.05  | 18.64   | 27.75  | No  |
| AEPTNPSK                          | 1.00 | 55.31  | 27.36 | 23.35  | 2 | 1130.6166 | 1130.6175 | 566.3160  | -0.0009 | -0.7946 | 129.87 | 131.29 | 153.43  | 150.94 | Yes |
| AEPTNPSK                          | 1.00 | 52.71  | 27.36 | 22.95  | 2 | 1130.6172 | 1130.6175 | 566.3160  | -0.0003 | -0.2649 | 158.19 | 207.05 | 181.55  | 160.11 | Yes |
| VLTDQYQAVR                        | 1.00 | 63.72  | 28.14 | 23.39  | 2 | 1464.7672 | 1464.7694 | 733.3920  | -0.0022 | -1.4999 | 42.42  | 43.26  | 61.94   | 55.47  | Yes |
| VLTDQYQAVR                        | 1.00 | 57.61  | 28.16 | 23.58  | 2 | 1464.7682 | 1464.7694 | 733.3920  | -0.0012 | -0.8181 | 36.84  | 65.30  | 66.06   | 49.47  | Yes |
| VTNVEWLLDALYGVK                   | 0.99 | 24.98  | 25.99 | 19.83  | 3 | 1908.0616 | 1908.0600 | 637.0273  | 0.0016  | 0.8372  | 4.99   | 12.48  | 8.36    | 14.85  | No  |
| VTNVEWLLDALYGVK                   | 1.00 | 45.10  | 26.09 | 32.45  | 3 | 1908.0628 | 1908.0600 | 637.0273  | 0.0028  | 1.4651  | 15.91  | 19.93  | 29.30   | 37.87  | No  |
| LLSVPLR                           | 0.74 | 21.11  | 18.06 | 34.11  | 2 | 940.6180  | 940.6191  | 471.3168  | -0.0011 | -1.1669 | 9.10   | 28.86  | 19.03   | 10.65  | No  |
| LLSVPLR                           | 0.87 | 13.64  | 18.06 | 21.96  | 2 | 940.6186  | 940.6191  | 471.3168  | -0.0005 | -0.5304 | 15.23  | 17.45  | 20.09   | 10.00  | No  |
| LLSVPLR                           | 0.80 | 13.48  | 18.06 | 26.48  | 2 | 940.6190  | 940.6191  | 471.3168  | -0.0001 | -0.1061 | 21.16  | 23.05  | 18.82   | 16.13  | No  |
| LLSVPLR                           | 0.98 | 20.94  | 18.06 | 19.89  | 2 | 940.6196  | 940.6191  | 471.3168  | 0.0005  | 0.5304  | 9.76   | 23.70  | 20.78   | 21.35  | No  |
| LLSVPLR                           | 0.97 | 18.45  | 18.06 |        |   |           |           |           |         |         |        |        |         |        |     |





















|         |      |       |       |       |   |          |          |          |         |         |           |           |           |           |     |
|---------|------|-------|-------|-------|---|----------|----------|----------|---------|---------|-----------|-----------|-----------|-----------|-----|
| IVVQ GK | 0.86 | 15.15 | 21.40 | 24.57 | 2 | 930.6110 | 930.6106 | 466.3126 | 0.0004  | 0.4289  | 2675.08   | 1872.48   | 1814.51   | 2763.83   | Yes |
| IVVQ GK | 0.76 | 14.56 | 21.40 | 23.94 | 2 | 930.6112 | 930.6106 | 466.3126 | 0.0006  | 0.6433  | 309.56    | 189.05    | 193.85    | 296.32    | Yes |
| IVVQ GK | 0.75 | 14.47 | 21.40 | 23.98 | 2 | 930.6112 | 930.6106 | 466.3126 | 0.0006  | 0.6433  | 251.64    | 166.54    | 165.37    | 227.70    | Yes |
| IVVQ GK | 0.75 | 14.33 | 21.40 | 23.85 | 2 | 930.6112 | 930.6106 | 466.3126 | 0.0006  | 0.6433  | 492.35    | 361.63    | 309.25    | 452.13    | Yes |
| IVVQ GK | 0.79 | 15.23 | 21.40 | 22.46 | 2 | 930.6114 | 930.6106 | 466.3126 | 0.0008  | 0.8578  | 508613.97 | 376362.07 | 377062.48 | 530311.76 | Yes |
| IVVQ GK | 0.76 | 14.54 | 21.40 | 25.91 | 2 | 930.6114 | 930.6106 | 466.3126 | 0.0008  | 0.8578  | 811.74    | 576.47    | 521.13    | 763.25    | Yes |
| IVVQ GK | 0.78 | 15.12 | 21.40 | 26.73 | 2 | 930.6114 | 930.6106 | 466.3126 | 0.0008  | 0.8578  | 2246.01   | 1572.56   | 1641.88   | 2284.98   | Yes |
| IVVQ GK | 0.78 | 14.97 | 21.40 | 26.54 | 2 | 930.6114 | 930.6106 | 466.3126 | 0.0008  | 0.8578  | 34213.88  | 22367.32  | 19498.40  | 31606.76  | Yes |
| IVVQ GK | 0.75 | 14.34 | 21.40 | 23.77 | 2 | 930.6114 | 930.6106 | 466.3126 | 0.0008  | 0.8578  | 437.96    | 351.58    | 280.64    | 428.64    | Yes |
| IVVQ GK | 0.83 | 16.32 | 21.40 | 25.68 | 2 | 930.6114 | 930.6106 | 466.3126 | 0.0008  | 0.8578  | 1206.57   | 940.81    | 852.49    | 1250.32   | Yes |
| IVVQ GK | 0.82 | 15.91 | 21.40 | 25.31 | 2 | 930.6114 | 930.6106 | 466.3126 | 0.0008  | 0.8578  | 4999.34   | 3311.05   | 3549.67   | 5197.85   | Yes |
| IVVQ GK | 0.78 | 14.95 | 21.40 | 25.10 | 2 | 930.6116 | 930.6106 | 466.3126 | 0.0010  | 1.0722  | 1342.43   | 891.80    | 812.55    | 1161.37   | Yes |
| IVVQ GK | 0.72 | 13.84 | 21.40 | 24.36 | 2 | 930.6116 | 930.6106 | 466.3126 | 0.0010  | 1.0722  | 776.36    | 587.51    | 516.80    | 755.92    | Yes |
| IVVQ GK | 0.84 | 16.57 | 21.40 | 25.87 | 2 | 930.6116 | 930.6106 | 466.3126 | 0.0010  | 1.0722  | 3554.61   | 2555.50   | 2527.88   | 3692.92   | Yes |
| IVVQ GK | 0.78 | 15.08 | 21.40 | 26.59 | 2 | 930.6116 | 930.6106 | 466.3126 | 0.0010  | 1.0722  | 31365.53  | 20275.27  | 22454.03  | 30943.82  | Yes |
| IVVQ GK | 0.76 | 14.61 | 21.40 | 23.33 | 2 | 930.6116 | 930.6106 | 466.3126 | 0.0010  | 1.0722  | 4683.30   | 3317.26   | 3304.08   | 4701.46   | Yes |
| IVVQ GK | 0.77 | 14.51 | 21.14 | 23.72 | 2 | 930.6118 | 930.6106 | 466.3126 | 0.0012  | 1.2867  | 2998.86   | 2546.76   | 2315.93   | 3447.51   | Yes |
| IVVQ GK | 0.83 | 16.02 | 21.14 | 25.31 | 2 | 930.6118 | 930.6106 | 466.3126 | 0.0012  | 1.2867  | 821.96    | 533.18    | 540.19    | 817.34    | Yes |
| IVVQ GK | 0.79 | 15.04 | 21.14 | 24.29 | 2 | 930.6118 | 930.6106 | 466.3126 | 0.0012  | 1.2867  | 3602.58   | 2422.80   | 2311.45   | 3553.45   | Yes |
| IVVQ GK | 0.77 | 14.54 | 21.14 | 22.56 | 2 | 930.6118 | 930.6106 | 466.3126 | 0.0012  | 1.2867  | 3363.43   | 2449.38   | 2483.55   | 3480.96   | Yes |
| IVVQ GK | 0.77 | 14.50 | 21.14 | 23.68 | 2 | 930.6118 | 930.6106 | 466.3126 | 0.0012  | 1.2867  | 4368.59   | 3119.03   | 3132.47   | 4507.61   | Yes |
| IVVQ GK | 0.85 | 16.62 | 21.14 | 25.82 | 2 | 930.6118 | 930.6106 | 466.3126 | 0.0012  | 1.2867  | 3101.17   | 2408.28   | 2105.50   | 3338.59   | Yes |
| IVVQ GK | 0.74 | 13.99 | 21.14 | 24.58 | 2 | 930.6118 | 930.6106 | 466.3126 | 0.0012  | 1.2867  | 2468.32   | 1892.06   | 1817.18   | 2645.59   | Yes |
| IVVQ GK | 0.73 | 13.70 | 21.14 | 24.37 | 2 | 930.6120 | 930.6106 | 466.3126 | 0.0014  | 1.5011  | 4486.69   | 3174.43   | 3453.14   | 4487.72   | Yes |
| IVVQ GK | 0.79 | 15.08 | 21.14 | 23.15 | 2 | 930.6120 | 930.6106 | 466.3126 | 0.0014  | 1.5011  | 4208.69   | 2894.63   | 2834.49   | 4415.77   | Yes |
| IVVQ GK | 0.86 | 16.77 | 21.14 | 25.07 | 2 | 930.6120 | 930.6106 | 466.3126 | 0.0014  | 1.5011  | 4186.68   | 2960.69   | 3021.59   | 4198.86   | Yes |
| IVVQ GK | 0.85 | 16.52 | 21.14 | 25.51 | 2 | 930.6120 | 930.6106 | 466.3126 | 0.0014  | 1.5011  | 4408.59   | 3108.88   | 3206.95   | 4416.85   | Yes |
| IVVQ GK | 0.87 | 17.13 | 21.14 | 26.34 | 2 | 930.6120 | 930.6106 | 466.3126 | 0.0014  | 1.5011  | 38268.84  | 26708.87  | 27673.78  | 37857.43  | Yes |
| IVVQ GK | 0.79 | 15.30 | 21.14 | 26.85 | 2 | 930.6120 | 930.6106 | 466.3126 | 0.0014  | 1.5011  | 4751.51   | 3571.43   | 3257.94   | 5052.01   | Yes |
| IVVQ GK | 0.79 | 15.09 | 21.14 | 26.59 | 2 | 930.6120 | 930.6106 | 466.3126 | 0.0014  | 1.5011  | 18127.19  | 12864.89  | 11704.91  | 17306.25  | Yes |
| IVVQ GK | 0.70 | 15.74 | 21.14 | 25.05 | 2 | 930.6122 | 930.6106 | 466.3126 | 0.0016  | 1.7156  | 4210.29   | 2842.48   | 2947.98   | 4168.75   | Yes |
| IVVQ GK | 0.74 | 16.49 | 21.14 | 25.71 | 2 | 930.6122 | 930.6106 | 466.3126 | 0.0016  | 1.7156  | 4627.42   | 3296.68   | 3341.48   | 4946.76   | Yes |
| IVVQ GK | 0.63 | 14.53 | 21.14 | 22.43 | 2 | 930.6122 | 930.6106 | 466.3126 | 0.0016  | 1.7156  | 3210.63   | 2408.02   | 2414.38   | 3479.25   | Yes |
| IVVQ GK | 0.67 | 15.26 | 21.14 | 24.73 | 2 | 930.6122 | 930.6106 | 466.3126 | 0.0016  | 1.7156  | 5016.99   | 3358.86   | 3443.00   | 5100.98   | Yes |
| IVVQ GK | 0.65 | 15.95 | 21.14 | 27.56 | 2 | 930.6122 | 930.6106 | 466.3126 | 0.0016  | 1.7156  | 26054.41  | 16991.04  | 17252.87  | 23773.48  | Yes |
| IVVQ GK | 0.71 | 15.96 | 21.14 | 25.23 | 2 | 930.6122 | 930.6106 | 466.3126 | 0.0016  | 1.7156  | 2101.50   | 1514.53   | 1532.48   | 2272.51   | Yes |
| IVVQ GK | 0.65 | 14.88 | 21.14 | 26.45 | 2 | 930.6122 | 930.6106 | 466.3126 | 0.0016  | 1.7156  | 16090.86  | 12129.44  | 11562.12  | 15188.74  | Yes |
| IVVQ GK | 0.65 | 14.87 | 21.14 | 26.52 | 2 | 930.6124 | 930.6106 | 466.3126 | 0.0018  | 1.9300  | 20486.71  | 14517.56  | 14482.35  | 19360.95  | Yes |
| IVVQ GK | 0.71 | 15.93 | 21.14 | 25.16 | 2 | 930.6124 | 930.6106 | 466.3126 | 0.0018  | 1.9300  | 4203.74   | 3034.73   | 3095.46   | 4150.77   | Yes |
| IVVQ GK | 0.66 | 15.17 | 21.14 | 24.53 | 2 | 930.6124 | 930.6106 | 466.3126 | 0.0018  | 1.9300  | 3075.53   | 2336.76   | 2309.34   | 3360.29   | Yes |
| IVVQ GK | 0.74 | 16.26 | 21.52 | 25.61 | 2 | 930.6086 | 930.6106 | 466.3126 | -0.0020 | -2.1445 | 1132.38   | 780.42    | 889.88    | 1194.45   | Yes |
| IVVQ GK | 0.89 | 18.01 | 21.52 | 25.49 | 2 | 930.6094 | 930.6106 | 466.3126 | -0.0012 | -1.2867 | 71.16     | 69.35     | 54.41     | 60.40     | No  |
| IVVQ GK | 0.86 | 16.88 | 21.52 | 22.02 | 2 | 930.6096 | 930.6106 | 466.3126 | -0.0010 | -1.0722 | 54.57     | 46.16     | 59.70     | 62.37     | No  |
| IVVQ GK | 0.79 | 15.01 | 21.52 | 25.60 | 2 | 930.6098 | 930.6106 | 466.3126 | -0.0008 | -0.8578 | 1161.79   | 865.79    | 838.67    | 1152.93   | Yes |
| IVVQ GK | 0.85 | 16.59 | 21.52 | 24.33 | 2 | 930.6100 | 930.6106 | 466.3126 | -0.0006 | -0.6433 | 2788.33   | 2036.59   | 2208.05   | 2924.34   | Yes |
| IVVQ GK | 0.84 | 16.39 | 21.52 | 24.03 | 2 | 930.6100 | 930.6106 | 466.3126 | -0.0006 | -0.6433 | 84.07     | 52.50     | 57.63     | 67.17     | Yes |
| IVVQ GK | 0.84 | 16.23 | 21.52 | 23.23 | 2 | 930.6100 | 930.6106 | 466.3126 | -0.0006 | -0.6433 | 139.88    | 102.98    | 83.00     | 147.34    | No  |
| IVVQ GK | 0.89 | 17.83 | 21.52 | 24.05 | 2 | 930.6100 | 930.6106 | 466.3126 | -0.0006 | -0.6433 | 43.61     | 21.79     | 30.91     | 46.69     | No  |
| IVVQ GK | 0.79 | 15.05 | 21.52 | 24.31 | 2 | 930.6100 | 930.6106 | 466.3126 | -0.0006 | -0.6433 | 107.40    | 65.78     | 65.55     | 107.28    | Yes |
| IVVQ GK | 0.86 | 16.94 | 21.52 | 24.39 | 2 | 930.6100 | 930.6106 | 466.3126 | -0.0006 | -0.6433 | 95.71     | 65.22     | 74.78     | 108.17    | Yes |
| IVVQ GK | 0.77 | 13.14 | 21.52 | 20.27 | 2 | 930.6104 | 930.6106 | 466.3126 | -0.0002 | -0.2144 | 165.95    | 135.10    | 114.26    | 159.83    | Yes |
| IVVQ GK | 0.82 | 14.28 | 21.52 | 21.20 | 2 | 930.6104 | 930.6106 | 466.3126 | -0.0002 | -0.2144 | 317.75    | 237.84    | 204.74    | 318.76    | Yes |
| IVVQ GK | 0.90 | 16.89 | 21.52 | 26.14 | 2 | 930.6104 | 930.6106 | 466.3126 | -0.0002 | -0.2144 | 4442.55   | 3391.01   | 3133.89   | 4885.63   | Yes |
| IVVQ GK | 0.88 | 16.06 | 21.52 | 22.98 | 2 | 930.6104 | 930.6106 | 466.3126 | -0.0002 | -0.2144 | 108.81    | 95.40     | 77.98     | 106.37    | Yes |
| IVVQ GK | 0.93 | 18.13 | 21.52 | 25.77 | 2 | 930.6104 | 930.6106 | 466.3126 | -0.0002 | -0.2144 | 87.06     | 60.28     | 63.93     | 92.33     | Yes |
| IVVQ GK | 0.83 | 14.61 | 21.52 | 23.87 | 2 | 930.6106 | 930.6106 | 466.3126 | 0.0000  | 0.0000  | 166.40    | 101.39    | 96.44     | 168.35    | Yes |
| IVVQ GK | 0.83 | 14.50 | 21.52 | 22.88 | 2 | 930.6106 | 930.6106 | 466.3126 | 0.0000  | 0.0000  | 2705.40   | 1973.80   | 1989.41   | 3022.65   | Yes |
| IVVQ GK | 0.87 | 15.90 | 21.52 | 24.10 | 2 | 930.6106 | 930.6106 | 466.3126 | 0.0000  | 0.0000  | 179.98    | 144.42    | 126.62    | 236.84    | No  |
| IVVQ GK | 0.90 | 16.71 | 21.52 | 24.65 | 2 | 930.6106 | 930.6106 | 466.3126 | 0.0000  | 0.0000  | 284.99    | 176.13    | 226.74    | 268.91    | No  |
| IVVQ GK | 0.86 | 16.00 | 21.52 | 27.47 | 2 | 930.6106 | 930.6106 | 466.3126 | 0.0000  | 0.0000  | 186.61    | 141.38    | 133.10    | 202.81    | Yes |
| IVVQ GK | 0.86 | 16.47 | 21.52 | 28.06 | 2 | 930.6106 | 930.6106 | 466.3126 | 0.0000  | 0.0000  | 124.35    | 76.71     | 85.57     | 134.60    | Yes |
| IVVQ GK | 0.86 | 16.27 | 21.40 | 27.82 | 2 | 930.6108 | 930.6106 | 466.3126 | 0.0002  | 0.2144  | 946.33    | 674.86    | 659.23    | 893.00    | Yes |
| IVVQ GK | 0.87 | 15.75 | 21.40 | 23.80 | 2 | 930.6108 | 930.6106 | 466.3126 | 0.0002  | 0.2144  | 2086.59   | 1513.48   | 1499.88   | 2219.73   | Yes |
| IVVQ GK | 0.91 | 17.05 | 21.40 | 26.24 | 2 | 930.6108 | 930.6106 | 466.3126 | 0.0002  | 0.2144  | 1325.71   | 918.64    | 876.92    | 1298.07   | Yes |
| IVVQ GK | 0.82 | 14.10 | 21.40 | 22.41 | 2 | 930.6110 | 930.6106 | 466.3126 | 0.0004  | 0.4289  | 336.98    | 266.35    | 221.46    | 310.22    | Yes |
| IVVQ GK | 0.71 | 11.69 | 21.40 | 24.23 | 2 | 930.6110 | 930.6106 | 466.3126 | 0.0004  | 0.4289  | 3489.92   | 2522.10   | 2651.25   | 3760.50   | Yes |
| IVVQ GK | 0.90 | 16.91 | 21.40 | 26.23 | 2 | 930.6110 | 930.6106 | 466.3126 | 0.0004  | 0.4289  | 5445.46   | 3862.16   | 3789.36   | 5820.07   | Yes |
| IVVQ GK | 0.79 | 15.30 | 21.40 | 24.66 | 2 | 930.6112 | 930.6106 | 466.3126 | 0.0006  | 0.6433  | 8556.65   | 6167.66   | 6299.66   | 9039.09   | Yes |
| IVVQ GK | 0.79 | 15.29 | 21.40 | 22.22 | 2 | 930.6114 | 930.6106 | 466.3126 | 0.0008  | 0.8578  | 462150.14 | 373498.63 | 340285.48 | 470657.78 | Yes |
| IVVQ GK | 0.82 | 16.00 | 21.40 | 25.32 | 2 | 930.6114 | 930.6106 | 466.3126 | 0.0008  | 0.8578  | 5920.17   | 4003.84   | 4564.17   | 5972.42   | Yes |
| IVVQ GK | 0.81 | 15.79 | 21.40 | 24.86 | 2 | 930.6116 | 930.6106 | 466.3126 | 0.0010  | 1.0722  | 3474.87   | 2632.26   | 2740.57   | 3930.27   | Yes |
| IVVQ GK | 0.65 | 12.31 | 21.14 | 22.48 | 2 | 930.6118 | 930.6106 | 466.3126 |         |         |           |           |           |           |     |

|         |        |       |       |       |   |          |          |          |         |         |           |           |           |           |     |
|---------|--------|-------|-------|-------|---|----------|----------|----------|---------|---------|-----------|-----------|-----------|-----------|-----|
| IVVQ GK | 0.77   | 14.45 | 21.14 | 23.85 | 2 | 930.6120 | 930.6106 | 466.3126 | 0.0014  | 1.5011  | 3215.64   | 2461.54   | 2310.15   | 3461.53   | Yes |
| IVVQ GK | 0.72   | 13.59 | 21.14 | 24.21 | 2 | 930.6120 | 930.6106 | 466.3126 | 0.0014  | 1.5011  | 393047.58 | 282297.16 | 245529.91 | 397879.23 | Yes |
| IVVQ GK | 0.76   | 14.43 | 21.14 | 23.50 | 2 | 930.6120 | 930.6106 | 466.3126 | 0.0014  | 1.5011  | 3250.29   | 2548.86   | 2277.41   | 3724.02   | Yes |
| IVVQ GK | 0.77   | 14.53 | 21.14 | 23.34 | 2 | 930.6120 | 930.6106 | 466.3126 | 0.0014  | 1.5011  | 2645.99   | 1972.52   | 1825.53   | 2621.96   | Yes |
| IVVQ GK | 0.77   | 14.55 | 21.14 | 23.98 | 2 | 930.6120 | 930.6106 | 466.3126 | 0.0014  | 1.5011  | 2882.53   | 2138.83   | 2037.69   | 3172.29   | Yes |
| IVVQ GK | 0.86   | 16.94 | 21.14 | 25.10 | 2 | 930.6120 | 930.6106 | 466.3126 | 0.0014  | 1.5011  | 2375.63   | 1633.34   | 1732.36   | 2476.74   | Yes |
| IVVQ GK | 0.83   | 16.03 | 21.14 | 25.24 | 2 | 930.6120 | 930.6106 | 466.3126 | 0.0014  | 1.5011  | 16891.84  | 12289.68  | 12391.52  | 16676.17  | Yes |
| IVVQ GK | 0.63   | 14.60 | 21.14 | 23.93 | 2 | 930.6122 | 930.6106 | 466.3126 | 0.0016  | 1.7156  | 2478.84   | 1773.41   | 1813.32   | 2571.79   | Yes |
| IVVQ GK | 0.63   | 14.60 | 21.14 | 23.81 | 2 | 930.6122 | 930.6106 | 466.3126 | 0.0016  | 1.7156  | 2567.64   | 1709.46   | 1929.64   | 2758.79   | Yes |
| IVVQ GK | 0.62   | 14.42 | 21.14 | 23.67 | 2 | 930.6122 | 930.6106 | 466.3126 | 0.0016  | 1.7156  | 4205.77   | 3283.19   | 3294.55   | 4540.77   | Yes |
| IVVQ GK | 0.54   | 13.18 | 21.14 | 24.93 | 2 | 930.6122 | 930.6106 | 466.3126 | 0.0016  | 1.7156  | 3410.06   | 2725.08   | 2488.24   | 3688.59   | Yes |
| IVVQ GK | 0.63   | 14.52 | 21.14 | 22.33 | 2 | 930.6122 | 930.6106 | 466.3126 | 0.0016  | 1.7156  | 2768.76   | 2076.53   | 2036.88   | 2918.17   | Yes |
| IVVQ GK | 0.57   | 13.64 | 21.14 | 25.26 | 2 | 930.6122 | 930.6106 | 466.3126 | 0.0016  | 1.7156  | 20667.78  | 13599.96  | 12960.54  | 17128.32  | Yes |
| IVVQ GK | 0.64   | 14.74 | 21.14 | 26.21 | 2 | 930.6122 | 930.6106 | 466.3126 | 0.0016  | 1.7156  | 15517.01  | 12954.83  | 10949.98  | 15879.16  | Yes |
| IVVQ GK | 0.66   | 16.93 | 21.14 | 28.35 | 2 | 930.6124 | 930.6106 | 466.3126 | 0.0018  | 1.9300  | 1107.42   | 817.03    | 754.77    | 1119.87   | Yes |
| IVVQ GK | 0.65   | 14.60 | 21.52 | 23.92 | 2 | 930.6098 | 930.6106 | 466.3126 | -0.0020 | -2.1445 | 81609.46  | 63631.09  | 68285.55  | 89785.62  | Yes |
| IVVQ GK | 0.63   | 14.31 | 21.52 | 23.49 | 2 | 930.6090 | 930.6106 | 466.3126 | -0.0016 | -1.7156 | 333643.78 | 257978.20 | 235832.47 | 354548.87 | Yes |
| IVVQ GK | 0.61   | 14.04 | 21.52 | 24.82 | 2 | 930.6090 | 930.6106 | 466.3126 | -0.0016 | -1.7156 | 24493.95  | 15928.95  | 15024.80  | 21374.17  | Yes |
| IVVQ GK | 0.77   | 14.48 | 21.52 | 20.45 | 2 | 930.6092 | 930.6106 | 466.3126 | -0.0014 | -1.5011 | 1583.02   | 1220.25   | 1091.83   | 1672.23   | Yes |
| IVVQ GK | 0.72   | 13.52 | 21.52 | 22.98 | 2 | 930.6092 | 930.6106 | 466.3126 | -0.0014 | -1.5011 | 1282.16   | 877.39    | 955.53    | 1285.81   | Yes |
| IVVQ GK | 0.68   | 12.78 | 21.52 | 21.96 | 2 | 930.6094 | 930.6106 | 466.3126 | -0.0012 | -1.2867 | 1393.10   | 1078.05   | 1013.07   | 1429.15   | Yes |
| IVVQ GK | 0.71   | 13.34 | 21.52 | 22.94 | 2 | 930.6098 | 930.6106 | 466.3126 | -0.0008 | -0.8578 | 1331.54   | 951.90    | 1031.09   | 1368.12   | Yes |
| IVVQ GK | 0.81   | 15.50 | 21.52 | 24.62 | 2 | 930.6098 | 930.6106 | 466.3126 | -0.0008 | -0.8578 | 1073.45   | 754.73    | 694.55    | 983.18    | Yes |
| IVVQ GK | 0.79   | 15.01 | 21.52 | 26.54 | 2 | 930.6100 | 930.6106 | 466.3126 | -0.0006 | -0.6433 | 5594.79   | 4036.67   | 3815.87   | 5134.18   | Yes |
| IVVQ GK | 0.74   | 13.99 | 21.52 | 22.79 | 2 | 930.6100 | 930.6106 | 466.3126 | -0.0006 | -0.6433 | 1279.20   | 924.95    | 859.82    | 1276.46   | Yes |
| IVVQ GK | 0.82   | 14.37 | 21.52 | 25.07 | 2 | 930.6102 | 930.6106 | 466.3126 | -0.0004 | -0.4289 | 6871.50   | 4843.59   | 4562.72   | 6127.57   | Yes |
| IVVQ GK | 0.79   | 13.46 | 21.52 | 21.44 | 2 | 930.6102 | 930.6106 | 466.3126 | -0.0004 | -0.4289 | 20986.05  | 17118.45  | 15743.08  | 21726.12  | Yes |
| IVVQ GK | 0.83   | 14.62 | 21.52 | 22.46 | 2 | 930.6102 | 930.6106 | 466.3126 | -0.0004 | -0.4289 | 1401.88   | 1014.75   | 1008.50   | 1491.75   | Yes |
| IVVQ GK | 0.88   | 16.13 | 21.52 | 22.62 | 2 | 930.6102 | 930.6106 | 466.3126 | -0.0004 | -0.4289 | 76.28     | 52.95     | 50.15     | 89.17     | Yes |
| IVVQ GK | 0.81   | 14.04 | 21.52 | 23.38 | 2 | 930.6104 | 930.6106 | 466.3126 | -0.0002 | -0.2144 | 2844.51   | 1984.91   | 2038.59   | 2943.63   | Yes |
| IVVQ GK | 0.83   | 14.64 | 21.52 | 22.17 | 2 | 930.6104 | 930.6106 | 466.3126 | -0.0002 | -0.2144 | 4338.37   | 2984.11   | 2883.25   | 4518.68   | Yes |
| IVVQ GK | 0.89   | 16.58 | 21.52 | 24.69 | 2 | 930.6104 | 930.6106 | 466.3126 | -0.0002 | -0.2144 | 66.75     | 61.14     | 45.18     | 87.98     | No  |
| IVVQ GK | 0.80   | 13.70 | 21.52 | 24.04 | 2 | 930.6106 | 930.6106 | 466.3126 | 0.0000  | 0.0000  | 1481.30   | 1098.82   | 1032.39   | 1410.98   | Yes |
| IVVQ GK | 0.78   | 13.38 | 21.52 | 22.48 | 2 | 930.6106 | 930.6106 | 466.3126 | 0.0000  | 0.0000  | 2944.22   | 2047.03   | 2195.57   | 2724.04   | Yes |
| IVVQ GK | 0.86   | 15.52 | 21.52 | 22.05 | 2 | 930.6106 | 930.6106 | 466.3126 | 0.0000  | 0.0000  | 85.04     | 77.89     | 52.44     | 85.32     | No  |
| IVVQ GK | 0.88   | 15.96 | 21.52 | 26.49 | 2 | 930.6106 | 930.6106 | 466.3126 | 0.0000  | 0.0000  | 92.83     | 57.84     | 71.97     | 80.77     | No  |
| IVVQ GK | 0.89   | 16.64 | 21.52 | 21.52 | 2 | 930.6106 | 930.6106 | 466.3126 | 0.0000  | 0.0000  | 70.94     | 44.54     | 51.59     | 81.88     | Yes |
| IVVQ GK | 0.79   | 13.52 | 21.40 | 22.69 | 2 | 930.6108 | 930.6106 | 466.3126 | 0.0002  | 0.2144  | 1622.98   | 1193.98   | 1107.59   | 1482.87   | Yes |
| IVVQ GK | 0.79   | 13.40 | 21.40 | 22.64 | 2 | 930.6108 | 930.6106 | 466.3126 | 0.0002  | 0.2144  | 1365.82   | 946.90    | 966.69    | 1413.42   | Yes |
| IVVQ GK | 0.79   | 13.49 | 21.40 | 21.67 | 2 | 930.6108 | 930.6106 | 466.3126 | 0.0002  | 0.2144  | 1062.38   | 828.19    | 751.87    | 1158.69   | Yes |
| IVVQ GK | 0.89   | 16.24 | 21.40 | 23.27 | 2 | 930.6108 | 930.6106 | 466.3126 | 0.0002  | 0.2144  | 760.88    | 549.29    | 553.47    | 723.47    | Yes |
| IVVQ GK | 0.84   | 14.62 | 21.40 | 23.70 | 2 | 930.6108 | 930.6106 | 466.3126 | 0.0002  | 0.2144  | 576.26    | 393.51    | 356.85    | 515.53    | Yes |
| IVVQ GK | 0.84   | 14.67 | 21.40 | 22.55 | 2 | 930.6108 | 930.6106 | 466.3126 | 0.0002  | 0.2144  | 237.30    | 192.12    | 178.18    | 235.76    | Yes |
| IVVQ GK | 0.88   | 15.95 | 21.40 | 21.41 | 2 | 930.6108 | 930.6106 | 466.3126 | 0.0002  | 0.2144  | 207.72    | 186.86    | 176.65    | 229.09    | Yes |
| IVVQ GK | 0.81   | 13.87 | 21.40 | 22.46 | 2 | 930.6110 | 930.6106 | 466.3126 | 0.0004  | 0.4289  | 5685.72   | 4192.87   | 4322.42   | 6014.19   | Yes |
| IVVQ GK | 0.84   | 14.68 | 21.40 | 22.07 | 2 | 930.6110 | 930.6106 | 466.3126 | 0.0004  | 0.4289  | 4433.22   | 2984.36   | 3056.48   | 4710.03   | Yes |
| IVVQ GK | 0.79   | 13.49 | 21.40 | 22.67 | 2 | 930.6110 | 930.6106 | 466.3126 | 0.0004  | 0.4289  | 1493.39   | 1080.67   | 1071.11   | 1533.44   | Yes |
| IVVQ GK | 0.70   | 13.41 | 21.40 | 20.25 | 2 | 930.6112 | 930.6106 | 466.3126 | 0.0006  | 0.6433  | 1340.04   | 964.03    | 926.68    | 1351.72   | Yes |
| IVVQ GK | 0.76   | 14.69 | 21.40 | 24.09 | 2 | 930.6112 | 930.6106 | 466.3126 | 0.0006  | 0.6433  | 1550.66   | 1210.24   | 1052.02   | 1557.62   | Yes |
| IVVQ GK | 0.64   | 12.34 | 21.40 | 21.38 | 2 | 930.6114 | 930.6106 | 466.3126 | 0.0008  | 0.8578  | 1271.27   | 914.00    | 951.26    | 1237.80   | Yes |
| IVVQ GK | 0.75   | 14.46 | 21.40 | 21.37 | 2 | 930.6114 | 930.6106 | 466.3126 | 0.0008  | 0.8578  | 640.10    | 466.76    | 453.39    | 585.80    | Yes |
| IVVQ GK | 0.73   | 14.07 | 21.40 | 24.93 | 2 | 930.6116 | 930.6106 | 466.3126 | 0.0010  | 1.0722  | 8683.55   | 5673.32   | 6005.11   | 7793.63   | Yes |
| IVVQ GK | 0.77   | 14.82 | 21.40 | 22.67 | 2 | 930.6116 | 930.6106 | 466.3126 | 0.0010  | 1.0722  | 1190.00   | 831.63    | 788.33    | 1125.32   | Yes |
| IVVQ GK | 0.73   | 14.08 | 21.40 | 22.05 | 2 | 930.6116 | 930.6106 | 466.3126 | 0.0010  | 1.0722  | 1315.80   | 973.19    | 869.60    | 1342.09   | Yes |
| IVVQ GK | 0.76   | 14.62 | 21.40 | 23.50 | 2 | 930.6116 | 930.6106 | 466.3126 | 0.0010  | 1.0722  | 998.99    | 699.13    | 708.91    | 1069.21   | Yes |
| IVVQ GK | 0.72   | 13.51 | 21.14 | 20.45 | 2 | 930.6118 | 930.6106 | 466.3126 | 0.0012  | 1.2867  | 8938.74   | 5980.24   | 5586.40   | 8595.38   | Yes |
| IVVQ GK | 0.77   | 14.56 | 21.14 | 22.75 | 2 | 930.6118 | 930.6106 | 466.3126 | 0.0012  | 1.2867  | 1568.44   | 1083.25   | 1097.60   | 1612.78   | Yes |
| IVVQ GK | 0.72   | 13.51 | 21.14 | 22.97 | 2 | 930.6118 | 930.6106 | 466.3126 | 0.0012  | 1.2867  | 2953.77   | 2357.68   | 2063.96   | 3024.97   | Yes |
| IVVQ GK | 0.74   | 14.34 | 21.14 | 26.91 | 2 | 930.6120 | 930.6106 | 466.3126 | 0.0014  | 1.5011  | 1283.81   | 1031.66   | 895.02    | 1388.66   | Yes |
| IVVQ GK | 0.78   | 14.74 | 21.14 | 24.03 | 2 | 930.6120 | 930.6106 | 466.3126 | 0.0014  | 1.5011  | 2756.24   | 2000.28   | 2047.21   | 2928.41   | Yes |
| IVVQ GK | 0.55   | 13.34 | 21.14 | 22.28 | 2 | 930.6122 | 930.6106 | 466.3126 | 0.0016  | 1.7156  | 1618.57   | 1129.32   | 1013.17   | 1573.03   | Yes |
| KPPPK   | 0.65   | 5.83  | 10.41 | 17.47 | 2 | 853.5620 | 853.5629 | 427.7887 | -0.0009 | -1.0519 | 815.70    | 792.46    | 458.71    | 602.49    | No  |
| IVVQ GK | 0.79   | 15.29 | 21.40 | 24.45 | 2 | 930.6112 | 930.6106 | 466.3126 | 0.0006  | 0.6433  | 550070.58 | 451438.06 | 429017.67 | 546100.58 | Yes |
| IVVQ GK | 0.74   | 14.22 | 21.40 | 19.57 | 2 | 930.6114 | 930.6106 | 466.3126 | 0.0008  | 0.8578  | 536202.40 | 402163.56 | 389549.61 | 559590.35 | Yes |
| IVVQ GK | 0.77   | 14.73 | 21.40 | 25.53 | 2 | 930.6116 | 930.6106 | 466.3126 | 0.0010  | 1.0722  | 6196.80   | 4514.26   | 5296.77   | 6889.04   | Yes |
| IVVQ GK | 0.75   | 16.87 | 21.14 | 26.19 | 2 | 930.6124 | 930.6106 | 466.3126 | 0.0018  | 1.9300  | 14230.10  | 11877.80  | 11913.07  | 17310.72  | Yes |
| IVVQ GK | 0.61   | 11.84 | 21.40 | 20.55 | 2 | 930.6116 | 930.6106 | 466.3126 | 0.0010  | 1.0722  | 4260.07   | 3360.93   | 3542.81   | 4837.24   | Yes |
| IVVQ GK | 0.63   | 14.66 | 21.14 | 23.84 | 2 | 930.6122 | 930.6106 | 466.3126 | 0.0016  | 1.7156  | 12839.17  | 11058.26  | 10591.54  | 15618.61  | Yes |
| IVVQ GK | 0.75   | 12.50 | 21.40 | 21.22 | 2 | 930.6108 | 930.6106 | 466.3126 | 0.0002  | 0.2144  | 6590.60   | 5206.10   | 5484.59   | 7595.36   | Yes |
| IVVQ GK | 0.83   | 16.28 | 21.40 | 26.46 | 2 | 930.6112 | 930.6106 | 466.3126 | 0.0006  | 0.6433  | 13880.54  | 11274.74  | 10093.55  | 15250.59  | Yes |
| IVVQ GK | 0.79   | 15.31 | 21.40 | 26.88 | 2 | 930.6112 | 930.6106 | 466.3126 | 0.0006  | 0.6433  | 34700.75  | 25840.56  | 27281.79  | 38293.25  | Yes |
| KPPPK   | 0.69</ |       |       |       |   |          |          |          |         |         |           |           |           |           |     |
