# Supplementary material
Source: PubMed Central journal article supplement (PMC3494205)
Supplement: supp_M112.020594_mcp.M112.020594-3.pdf [file supp_M112.020594_mcp.M112.020594-3.pdf]

**Supplementary Table SII. The list of 131 quantificated candidates in ASC-pulled down complexes after treatments**

| Gene symbol | Accession No. | Protein name                                                                                                     | Protein probability | No. of identified peptides | Percent coverage % | iTRAQ ratio                                 |      |                   |      |                   |      | Spectrum No. for quantification |
|-------------|---------------|------------------------------------------------------------------------------------------------------------------|---------------------|----------------------------|--------------------|---------------------------------------------|------|-------------------|------|-------------------|------|---------------------------------|
|             |               |                                                                                                                  |                     |                            |                    | H <sub>2</sub> O <sub>2</sub> /UN (116/114) | SD   | dAdT/UN (117/114) | SD   | EBER/UN (115/114) | SD   |                                 |
| A2M         | P01023        | Alpha-2-macroglobulin                                                                                            | 1.00                | 5                          | 4.2                | 1.06                                        | 0.19 | 0.97              | 0.15 | 0.98              | 0.20 | 17                              |
| ACTA2       | P62736        | Actin, aortic smooth muscle                                                                                      | 1.00                | 10                         | 31.9               | 1.02                                        | 0.24 | 1.15              | 0.26 | 0.91              | 0.39 | 51                              |
| AGAP3       | Q96P47        | Arf-GAP with GTPase, ANK repeat and PH domain-containing protein 3                                               | 1.00                | 3                          | 5.4                | 1.00                                        | 0.11 | 0.95              | 0.14 | 1.00              | 0.14 | 9                               |
| ALB         | P02768        | Serum albumin                                                                                                    | 1.00                | 8                          | 11.7               | 1.21                                        | 0.40 | 1.06              | 0.27 | 1.04              | 0.41 | 29                              |
| ALDH1A3     | P47895        | Aldehyde dehydrogenase family 1 member A3                                                                        | 1.00                | 4                          | 12.9               | 0.88                                        | 0.21 | 0.99              | 0.22 | 0.89              | 0.25 | 11                              |
| ALS2CR4     | Q96Q45        | Amyotrophic lateral sclerosis 2 chromosomal region candidate gene 4 protein                                      | 1.00                | 4                          | 15.3               | 1.31                                        | 0.23 | 1.06              | 0.23 | 1.11              | 0.24 | 11                              |
| ARF1        | P84077        | ADP-ribosylation factor 1                                                                                        | 1.00                | 2                          | 19.3               | 0.92                                        | 0.32 | 1.11              | 0.27 | 0.88              | 0.26 | 5                               |
| C22orf28    | Q9Y310        | UPF0027 protein C22orf28                                                                                         | 1.00                | 2                          | 4.4                | 0.82                                        | 0.13 | 0.94              | 0.17 | 1.13              | 0.51 | 6                               |
| C3          | P01024        | Complement C3                                                                                                    | 1.00                | 3                          | 1.7                | 0.97                                        | 0.10 | 0.98              | 0.09 | 0.89              | 0.13 | 6                               |
| CAD         | P27708        | CAD protein                                                                                                      | 1.00                | 6                          | 3.3                | 0.81                                        | 0.16 | 0.94              | 0.11 | 1.06              | 0.26 | 11                              |
| CARM1       | Q86X55        | Histone-arginine methyltransferase CARM1                                                                         | 1.00                | 7                          | 8.0                | 1.07                                        | 0.30 | 1.02              | 0.23 | 1.09              | 0.37 | 19                              |
| CAV1        | Q03135        | Caveolin-1                                                                                                       | 1.00                | 2                          | 9.6                | 0.73                                        | 0.15 | 0.84              | 0.08 | 0.80              | 0.10 | 7                               |
| CCT3        | P49368        | T-complex protein 1 subunit gamma                                                                                | 1.00                | 3                          | 6.2                | 0.88                                        | 0.15 | 0.95              | 0.14 | 0.76              | 0.11 | 6                               |
| CCT6A       | P40227        | T-complex protein 1 subunit zeta                                                                                 | 1.00                | 5                          | 18.5               | 0.98                                        | 0.16 | 1.33              | 0.15 | 0.95              | 0.21 | 5                               |
| CPSF7       | Q8N684        | Cleavage and polyadenylation specificity factor subunit 7                                                        | 1.00                | 9                          | 24.6               | 0.95                                        | 0.12 | 1.03              | 0.15 | 0.97              | 0.16 | 21                              |
| DDX3X       | O00571        | ATP-dependent RNA helicase DDX3X                                                                                 | 1.00                | 2                          | 3.2                | 0.88                                        | 0.12 | 1.12              | 0.07 | 1.07              | 0.12 | 3                               |
| DERA        | Q9Y315        | Putative deoxyribose-phosphate aldolase                                                                          | 1.00                | 2                          | 6.9                | 1.10                                        | 0.19 | 0.98              | 0.19 | 1.24              | 0.18 | 7                               |
| DHX9        | Q08211        | ATP-dependent RNA helicase A                                                                                     | 1.00                | 3                          | 2.0                | 1.07                                        | 0.09 | 0.93              | 0.06 | 1.43              | 0.20 | 7                               |
| DLAT        | P10515        | Dihydrolipoyllysine-residue acetyltransferase component of pyruvate dehydrogenase complex, mitochondrial         | 1.00                | 9                          | 25.3               | 0.94                                        | 0.12 | 0.89              | 0.10 | 0.93              | 0.16 | 13                              |
| DLST        | P36957        | Dihydrolipoyllysine-residue succinyltransferase component of 2-oxoglutarate dehydrogenase complex, mitochondrial | 1.00                | 2                          | 4.6                | 1.66                                        | 0.70 | 2.42              | 1.46 | 2.19              | 1.19 | 3                               |
| DSP         | P15924        | Desmoplakin                                                                                                      | 1.00                | 13                         | 5.9                | 1.14                                        | 0.31 | 0.96              | 0.27 | 1.07              | 0.33 | 14                              |
| DYNC1H1     | Q14204        | Cytoplasmic dynein 1 heavy chain 1                                                                               | 1.00                | 3                          | 0.9                | 0.92                                        | 0.11 | 0.94              | 0.16 | 0.79              | 0.13 | 5                               |
| EEF1A1      | P68104        | Elongation factor 1-alpha 1                                                                                      | 1.00                | 12                         | 28.1               | 0.92                                        | 0.17 | 1.04              | 0.16 | 0.92              | 0.14 | 40                              |

|           |        |                                                    |      |    |      |      |      |      |      |      |      |    |
|-----------|--------|----------------------------------------------------|------|----|------|------|------|------|------|------|------|----|
| EEF2      | P13639 | Elongation factor 2                                | 1.00 | 3  | 7.2  | 0.92 | 0.35 | 0.92 | 0.35 | 1.11 | 0.22 | 3  |
| EIF4A1    | P60842 | Eukaryotic initiation factor 4A-I                  | 1.00 | 5  | 17.6 | 1.03 | 0.28 | 1.05 | 0.18 | 1.02 | 0.33 | 24 |
| EPRS      | P07814 | Bifunctional aminoacyl-tRNA synthetase             | 1.00 | 5  | 5.4  | 1.14 | 0.22 | 1.11 | 0.14 | 1.12 | 0.20 | 7  |
| FAM136A   | Q96C01 | Protein FAM136A                                    | 1.00 | 10 | 68.1 | 1.14 | 0.34 | 1.02 | 0.24 | 1.04 | 0.29 | 56 |
| FAM83H    | Q6ZRV2 | Protein FAM83H                                     | 1.00 | 3  | 2.5  | 0.91 | 0.17 | 0.93 | 0.31 | 1.05 | 0.22 | 5  |
| FASN      | P49327 | Fatty acid synthase                                | 1.00 | 9  | 5.7  | 0.74 | 0.19 | 0.97 | 0.15 | 0.95 | 0.17 | 10 |
| FLNA      | P21333 | Filamin-A                                          | 1.00 | 4  | 2.0  | 1.07 | 0.14 | 1.03 | 0.20 | 0.93 | 0.23 | 10 |
| FN1       | P02751 | Fibronectin                                        | 1.00 | 2  | 0.8  | 1.21 | 0.19 | 1.06 | 0.16 | 1.49 | 0.58 | 8  |
| FUS       | P35637 | RNA-binding protein FUS                            | 1.00 | 6  | 18.7 | 0.93 | 0.20 | 0.94 | 0.22 | 1.20 | 0.32 | 22 |
| GPHN      | Q9NQX3 | Gephyrin                                           | 1.00 | 9  | 14.9 | 1.00 | 0.29 | 0.98 | 0.27 | 1.31 | 0.48 | 13 |
| GRN       | P28799 | Granulins                                          | 1.00 | 7  | 16.5 | 1.05 | 0.48 | 0.90 | 0.29 | 0.74 | 0.55 | 27 |
| H1FX      | Q92522 | Histone H1x                                        | 1.00 | 2  | 14.6 | 1.07 | 0.15 | 0.67 | 0.33 | 0.74 | 0.05 | 5  |
| HIST1H1C  | P16403 | Histone H1.2                                       | 1.00 | 3  | 10.3 | 1.14 | 0.29 | 0.88 | 0.33 | 1.13 | 0.25 | 7  |
| HIST1H2AB | P04908 | Histone H2A type 1-B/E                             | 1.00 | 2  | 21.7 | 1.07 | 0.13 | 1.26 | 0.18 | 1.54 | 0.29 | 4  |
| HNRNPA1   | P09651 | Heterogeneous nuclear ribonucleoprotein A1         | 1.00 | 6  | 30.9 | 1.00 | 0.12 | 1.01 | 0.16 | 1.82 | 0.17 | 11 |
| HNRNPA2B1 | P22626 | Heterogeneous nuclear ribonucleoproteins A2/B1     | 1.00 | 8  | 25.5 | 1.07 | 0.21 | 0.98 | 0.12 | 1.84 | 0.33 | 25 |
| HNRNPA3   | P51991 | Heterogeneous nuclear ribonucleoprotein A3         | 1.00 | 3  | 16.7 | 0.94 | 0.20 | 0.96 | 0.10 | 1.47 | 0.38 | 6  |
| HNRNPD    | Q14103 | Heterogeneous nuclear ribonucleoprotein D0         | 1.00 | 3  | 12.5 | 1.07 | 0.44 | 1.03 | 0.23 | 1.84 | 1.23 | 11 |
| HNRNPH1   | P31943 | Heterogeneous nuclear ribonucleoprotein H          | 1.00 | 3  | 6.2  | 0.96 | 0.17 | 0.88 | 0.07 | 1.67 | 0.14 | 4  |
| HNRNPU    | Q00839 | Heterogeneous nuclear ribonucleoprotein U          | 1.00 | 5  | 7.5  | 1.04 | 0.12 | 1.44 | 0.35 | 1.54 | 0.28 | 4  |
| HRG       | P04196 | Histidine-rich glycoprotein                        | 1.00 | 2  | 4.0  | 0.98 | 0.11 | 1.02 | 0.18 | 0.98 | 0.13 | 8  |
| HSPA8     | P11142 | Heat shock cognate 71 kDa protein                  | 1.00 | 12 | 22.0 | 0.87 | 0.24 | 0.97 | 0.23 | 0.99 | 0.22 | 19 |
| HSPA9     | P38646 | Stress-70 protein, mitochondrial                   | 1.00 | 26 | 39.6 | 0.98 | 0.18 | 0.84 | 0.16 | 1.13 | 0.19 | 81 |
| HTRA2     | O43464 | Serine protease HTRA2, mitochondrial               | 1.00 | 6  | 21.8 | 1.21 | 0.30 | 0.98 | 0.22 | 1.11 | 0.30 | 10 |
| IFFO2     | Q5TF58 | Intermediate filament family orphan 2              | 1.00 | 3  | 17.1 | 0.83 | 0.09 | 1.99 | 0.37 | 2.05 | 0.29 | 10 |
| KARS      | Q15046 | Lysyl-tRNA synthetase                              | 1.00 | 2  | 2.5  | 0.78 | 0.07 | 0.94 | 0.05 | 0.83 | 0.07 | 10 |
| KCTD3     | Q9Y597 | BTB/POZ domain-containing protein KCTD3            | 1.00 | 4  | 8.3  | 0.93 | 0.11 | 0.78 | 0.11 | 0.77 | 0.15 | 8  |
| LIMD1     | Q9UGP4 | LIM domain-containing protein 1                    | 1.00 | 8  | 18.6 | 0.95 | 0.18 | 1.11 | 0.40 | 1.24 | 0.37 | 9  |
| LMNA      | P02545 | Lamin-A/C                                          | 1.00 | 2  | 3.9  | 0.81 | 0.32 | 0.75 | 0.23 | 0.72 | 0.26 | 3  |
| LPP       | Q93052 | Lipoma-preferred partner                           | 1.00 | 3  | 7.4  | 0.87 | 0.33 | 1.13 | 0.19 | 1.15 | 0.18 | 4  |
| LTF       | P02788 | Lactotransferrin                                   | 1.00 | 2  | 2.2  | 1.00 | 0.21 | 0.95 | 0.16 | 0.94 | 0.19 | 8  |
| LUZP1     | Q86V48 | Leucine zipper protein 1                           | 1.00 | 2  | 2.0  | 0.93 | 0.14 | 1.06 | 0.20 | 1.10 | 0.46 | 5  |
| LZTFL1    | Q9NQ48 | Leucine zipper transcription factor-like protein 1 | 1.00 | 8  | 26.1 | 1.07 | 0.20 | 1.04 | 0.17 | 1.00 | 0.19 | 27 |
| MAP4      | P27816 | Microtubule-associated protein 4                   | 1.00 | 2  | 3.6  | 0.90 | 0.09 | 1.06 | 0.07 | 1.10 | 0.09 | 9  |
| MAPRE1    | Q15691 | End binding protein 1                              | 1.00 | 4  | 17.5 | 1.70 | 0.29 | 1.47 | 0.20 | 1.49 | 0.27 | 32 |
| MCM5      | P33992 | DNA replication licensing factor MCM5              | 1.00 | 2  | 3.7  | 0.79 | 0.17 | 1.00 | 0.20 | 1.09 | 0.17 | 3  |
| MCM7      | P33993 | DNA replication licensing factor MCM7              | 1.00 | 3  | 4.2  | 0.89 | 0.08 | 0.84 | 0.17 | 0.92 | 0.11 | 3  |

|         |        |                                                                             |      |    |      |      |      |      |      |      |      |     |
|---------|--------|-----------------------------------------------------------------------------|------|----|------|------|------|------|------|------|------|-----|
| MTHFD1  | P11586 | C-1-tetrahydrofolate synthase, cytoplasmic                                  | 1.00 | 2  | 3.7  | 0.80 | 0.09 | 0.79 | 0.13 | 0.64 | 0.18 | 7   |
| MTHFD1L | Q6UB35 | Monofunctional C1-tetrahydrofolate synthase, mitochondrial                  | 1.00 | 3  | 5.2  | 1.09 | 0.20 | 1.05 | 0.10 | 0.96 | 0.09 | 7   |
| MVP     | Q14764 | Major vault protein                                                         | 1.00 | 11 | 21.2 | 0.86 | 0.24 | 0.72 | 0.24 | 1.56 | 0.68 | 18  |
| MYH9    | P35579 | Myosin-9                                                                    | 1.00 | 3  | 2.6  | 1.42 | 0.27 | 1.00 | 0.17 | 1.53 | 0.56 | 3   |
| MYO1B   | O43795 | Myosin-Ib                                                                   | 1.00 | 3  | 3.3  | 0.78 | 0.13 | 0.84 | 0.11 | 0.70 | 0.22 | 11  |
| NCL     | P19338 | Nucleolin                                                                   | 1.00 | 7  | 8.6  | 0.83 | 0.13 | 1.05 | 0.21 | 1.35 | 0.22 | 10  |
| NIF3L1  | Q9GZT8 | NIF3-like protein 1                                                         | 1.00 | 2  | 4.8  | 1.21 | 0.16 | 1.02 | 0.07 | 1.02 | 0.10 | 7   |
| NOLC1   | Q14978 | Nucleolar and coiled-body phosphoprotein 1                                  | 1.00 | 3  | 6.3  | 0.84 | 0.09 | 1.27 | 0.13 | 1.35 | 0.21 | 3   |
| NPM1    | P06748 | Nucleophosmin                                                               | 1.00 | 3  | 16.1 | 1.04 | 0.20 | 1.25 | 0.17 | 1.88 | 0.29 | 8   |
| NUDT21  | O43809 | Cleavage and polyadenylation specificity factor subunit 5                   | 1.00 | 8  | 41.4 | 1.00 | 0.17 | 1.01 | 0.16 | 1.02 | 0.15 | 35  |
| PCNA    | P12004 | Proliferating cell nuclear antigen                                          | 1.00 | 3  | 12.3 | 1.04 | 0.30 | 0.93 | 0.07 | 0.84 | 0.44 | 3   |
| PHB     | P35232 | Prohibitin                                                                  | 1.00 | 2  | 7.0  | 1.05 | 0.08 | 0.97 | 0.11 | 0.87 | 0.11 | 3   |
| PHB2    | Q99623 | Prohibitin-2                                                                | 1.00 | 7  | 26.8 | 1.01 | 0.22 | 0.91 | 0.20 | 0.83 | 0.17 | 18  |
| PKM2    | P14618 | Pyruvate kinase isozymes M1/M2                                              | 1.00 | 13 | 41.1 | 0.77 | 0.17 | 0.84 | 0.18 | 0.61 | 0.21 | 29  |
| PPP2R3A | Q06190 | Serine/threonine-protein phosphatase 2A regulatory subunit B" subunit alpha | 1.00 | 6  | 7.4  | 1.00 | 0.22 | 1.08 | 0.17 | 1.24 | 0.35 | 13  |
| PRKDC   | P78527 | DNA-dependent protein kinase catalytic subunit                              | 1.00 | 7  | 3.1  | 0.92 | 0.29 | 0.95 | 0.14 | 0.85 | 0.25 | 13  |
| PSMC1   | P62191 | 26S protease regulatory subunit 4                                           | 1.00 | 2  | 7.3  | 0.93 | 0.11 | 0.86 | 0.06 | 0.73 | 0.13 | 4   |
| PYCARD  | Q9ULZ3 | Apoptosis-associated speck-like protein containing a CARD                   | 1.00 | 16 | 61.5 | 1.07 | 0.30 | 1.02 | 0.25 | 0.89 | 0.27 | 236 |
| RAN     | P62826 | GTP-binding nuclear protein Ran                                             | 1.00 | 4  | 25.5 | 0.90 | 0.15 | 0.62 | 0.06 | 0.64 | 0.14 | 9   |
| RPL10   | P27635 | 60S ribosomal protein L10                                                   | 1.00 | 3  | 18.7 | 0.86 | 0.06 | 1.28 | 0.13 | 0.94 | 0.05 | 7   |
| RPL13   | P26373 | 60S ribosomal protein L13                                                   | 1.00 | 3  | 14.2 | 1.14 | 0.08 | 1.29 | 0.17 | 1.28 | 0.24 | 7   |
| RPL13A  | P40429 | 60S ribosomal protein L13a                                                  | 1.00 | 3  | 9.9  | 1.14 | 0.29 | 1.11 | 0.15 | 1.26 | 0.31 | 3   |
| RPL15   | P61313 | 60S ribosomal protein L15                                                   | 1.00 | 2  | 19.6 | 1.12 | 0.28 | 1.12 | 0.31 | 1.04 | 0.18 | 6   |
| RPL17   | P18621 | 60S ribosomal protein L17                                                   | 1.00 | 3  | 13.6 | 0.72 | 0.11 | 1.15 | 0.25 | 0.97 | 0.16 | 5   |
| RPL18   | Q07020 | 60S ribosomal protein L18                                                   | 1.00 | 3  | 25.5 | 0.82 | 0.15 | 0.78 | 0.23 | 1.00 | 0.23 | 9   |
| RPL18A  | Q02543 | 60S ribosomal protein L18a                                                  | 1.00 | 2  | 16.5 | 0.96 | 0.07 | 1.04 | 0.05 | 1.10 | 0.19 | 5   |
| RPL23   | P62829 | 60S ribosomal protein L23                                                   | 1.00 | 2  | 11.4 | 0.94 | 0.18 | 1.04 | 0.15 | 0.94 | 0.16 | 8   |
| RPL24   | P83731 | 60S ribosomal protein L24                                                   | 1.00 | 4  | 24.2 | 1.05 | 0.52 | 1.19 | 0.46 | 1.13 | 0.42 | 3   |
| RPL26   | P61254 | 60S ribosomal protein L26                                                   | 1.00 | 5  | 29.0 | 0.86 | 0.22 | 0.93 | 0.25 | 1.00 | 0.17 | 9   |
| RPL27   | P61353 | 60S ribosomal protein L27                                                   | 1.00 | 3  | 19.9 | 1.00 | 0.16 | 1.08 | 0.14 | 1.13 | 0.12 | 5   |
| RPL28   | P46779 | 60S ribosomal protein L28                                                   | 1.00 | 3  | 17.5 | 1.11 | 0.21 | 1.14 | 0.27 | 1.12 | 0.27 | 7   |
| RPL3    | P39023 | 60S ribosomal protein L3                                                    | 1.00 | 3  | 5.2  | 1.14 | 0.20 | 1.11 | 0.21 | 1.24 | 0.14 | 7   |
| RPL30   | P62888 | 60S ribosomal protein L30                                                   | 1.00 | 2  | 15.7 | 0.83 | 0.04 | 0.88 | 0.11 | 1.00 | 0.03 | 6   |

|         |        |                                                       |      |    |      |      |      |      |      |      |      |     |
|---------|--------|-------------------------------------------------------|------|----|------|------|------|------|------|------|------|-----|
| RPL34   | P49207 | 60S ribosomal protein L34                             | 1.00 | 2  | 13.7 | 1.22 | 0.26 | 1.29 | 0.26 | 1.58 | 0.36 | 6   |
| RPL35A  | P18077 | 60S ribosomal protein L35a                            | 1.00 | 4  | 20.0 | 0.92 | 0.14 | 0.95 | 0.14 | 1.07 | 0.17 | 12  |
| RPL4    | P36578 | 60S ribosomal protein L4                              | 1.00 | 5  | 13.8 | 1.05 | 0.29 | 1.01 | 0.29 | 1.16 | 0.34 | 12  |
| RPL5    | P46777 | 60S ribosomal protein L5                              | 1.00 | 4  | 10.8 | 0.95 | 0.07 | 1.03 | 0.22 | 1.29 | 0.17 | 6   |
| RPL6    | Q02878 | 60S ribosomal protein L6                              | 1.00 | 3  | 10.8 | 1.05 | 0.14 | 1.07 | 0.09 | 1.09 | 0.09 | 6   |
| RPL7    | P18124 | 60S ribosomal protein L7                              | 1.00 | 2  | 12.1 | 1.07 | 0.20 | 1.15 | 0.13 | 1.04 | 0.13 | 5   |
| RPL7A   | P62424 | 60S ribosomal protein L7a                             | 1.00 | 4  | 16.5 | 0.97 | 0.13 | 1.09 | 0.14 | 1.11 | 0.13 | 8   |
| RPL8    | P62917 | 60S ribosomal protein L8                              | 1.00 | 3  | 9.7  | 1.04 | 0.11 | 1.18 | 0.14 | 1.21 | 0.17 | 12  |
| RPS11   | P62280 | 40S ribosomal protein S11                             | 1.00 | 5  | 37.3 | 0.90 | 0.13 | 1.01 | 0.13 | 0.82 | 0.12 | 10  |
| RPS14   | P62263 | 40S ribosomal protein S14                             | 1.00 | 3  | 15.4 | 1.00 | 0.19 | 1.01 | 0.20 | 0.96 | 0.13 | 9   |
| RPS15A  | P62244 | 40S ribosomal protein S15a                            | 1.00 | 3  | 18.5 | 1.01 | 0.23 | 0.95 | 0.17 | 0.95 | 0.36 | 19  |
| RPS18   | P62269 | 40S ribosomal protein S18                             | 1.00 | 2  | 19.1 | 0.92 | 0.10 | 0.93 | 0.10 | 1.05 | 0.11 | 6   |
| RPS2    | P15880 | 40S ribosomal protein S2                              | 1.00 | 4  | 23.3 | 0.92 | 0.27 | 1.10 | 0.12 | 0.93 | 0.18 | 10  |
| RPS23   | P62266 | 40S ribosomal protein S23                             | 1.00 | 2  | 16.1 | 1.17 | 0.19 | 1.26 | 0.14 | 1.22 | 0.19 | 5   |
| RPS27A  | P62988 | Ubiquitin                                             | 1.00 | 2  | 15.8 | 0.86 | 0.04 | 0.88 | 0.16 | 0.78 | 0.07 | 5   |
| RPS3    | P23396 | 40S ribosomal protein S3                              | 1.00 | 3  | 11.5 | 0.97 | 0.23 | 1.01 | 0.25 | 1.01 | 0.27 | 7   |
| RPS3A   | P61247 | 40S ribosomal protein S3a                             | 1.00 | 3  | 12.7 | 1.02 | 0.13 | 1.04 | 0.14 | 1.02 | 0.25 | 7   |
| RPS4X   | P62701 | 40S ribosomal protein S4, X isoform                   | 1.00 | 3  | 8.0  | 1.12 | 0.17 | 1.62 | 0.22 | 1.82 | 0.26 | 7   |
| RPS7    | P62081 | 40S ribosomal protein S7                              | 1.00 | 3  | 19.6 | 0.77 | 0.30 | 0.98 | 0.39 | 0.90 | 0.17 | 3   |
| RPS9    | P46781 | 40S ribosomal protein S9                              | 1.00 | 6  | 25.4 | 0.93 | 0.14 | 1.03 | 0.15 | 0.82 | 0.12 | 8   |
| SERBP1  | Q8NC51 | Plasminogen activator inhibitor 1 RNA-binding protein | 1.00 | 2  | 6.6  | 1.02 | 0.52 | 1.17 | 0.21 | 1.24 | 0.48 | 3   |
| SFPQ    | P23246 | Splicing factor, proline- and glutamine-rich          | 1.00 | 6  | 11.2 | 1.00 | 0.15 | 1.10 | 0.14 | 1.32 | 0.25 | 14  |
| SLC25A3 | Q00325 | Phosphate carrier protein, mitochondrial              | 1.00 | 2  | 5.3  | 1.10 | 0.21 | 1.02 | 0.32 | 0.84 | 0.24 | 5   |
| SLC25A5 | P05141 | ADP/ATP translocase 2                                 | 1.00 | 6  | 18.8 | 0.94 | 0.32 | 0.99 | 0.25 | 0.84 | 0.37 | 14  |
| SMC3    | Q9UQE7 | Structural maintenance of chromosomes protein 3       | 1.00 | 2  | 4.6  | 0.74 | 0.15 | 0.83 | 0.11 | 0.83 | 0.03 | 4   |
| TCOF1   | Q13428 | Treacle protein                                       | 1.00 | 2  | 2.1  | 0.99 | 0.06 | 1.19 | 0.17 | 0.86 | 0.08 | 3   |
| TCP1    | P17987 | T-complex protein 1 subunit alpha                     | 1.00 | 3  | 5.8  | 1.03 | 0.05 | 0.93 | 0.17 | 0.78 | 0.17 | 5   |
| TECR    | Q9NZ01 | Trans-2,3-enoyl-CoA reductase                         | 1.00 | 2  | 5.5  | 0.92 | 0.08 | 0.88 | 0.18 | 0.70 | 0.08 | 3   |
| THBS1   | P07996 | Thrombospondin-1                                      | 1.00 | 2  | 2.2  | 0.71 | 0.21 | 0.69 | 0.13 | 0.70 | 0.21 | 3   |
| TMF1    | P82094 | TATA element modulatory factor                        | 1.00 | 3  | 5.3  | 1.13 | 0.12 | 1.14 | 0.13 | 1.05 | 0.14 | 8   |
| TRIM21  | P19474 | 52 kDa Ro protein                                     | 1.00 | 25 | 57.5 | 1.35 | 0.35 | 1.02 | 0.26 | 1.27 | 0.59 | 113 |
| TSC1    | Q92574 | Hamartin                                              | 1.00 | 3  | 2.9  | 1.02 | 0.21 | 1.02 | 0.36 | 0.62 | 0.14 | 3   |
| TTN     | Q8WZ42 | Titin                                                 | 1.00 | 4  | 0.2  | 0.62 | 0.06 | 0.82 | 0.09 | 0.61 | 0.06 | 180 |
| TUBB    | P07437 | Tubulin beta chain                                    | 1.00 | 15 | 45.3 | 0.95 | 0.29 | 0.97 | 0.29 | 0.82 | 0.22 | 42  |
| TUFM    | P49411 | Elongation factor Tu, mitochondrial                   | 1.00 | 2  | 3.8  | 0.86 | 0.14 | 0.92 | 0.11 | 0.85 | 0.18 | 4   |
| UQCRC2  | P22695 | Cytochrome b-c1 complex subunit 2, mitochondrial      | 1.00 | 3  | 9.1  | 0.92 | 0.34 | 0.81 | 0.24 | 0.88 | 0.53 | 6   |
| XIAP    | P98170 | Baculoviral IAP repeat-containing protein 4           | 1.00 | 13 | 30.6 | 1.03 | 0.17 | 0.97 | 0.16 | 0.90 | 0.19 | 29  |

|         |        |                                               |      |   |     |      |      |      |      |      |      |   |
|---------|--------|-----------------------------------------------|------|---|-----|------|------|------|------|------|------|---|
| ZFYVE19 | Q96K21 | Zinc finger FYVE domain-containing protein 19 | 1.00 | 2 | 3.1 | 0.99 | 0.16 | 1.02 | 0.09 | 1.05 | 0.21 | 4 |
|---------|--------|-----------------------------------------------|------|---|-----|------|------|------|------|------|------|---|

---
