# Supplementary material
Source: PubMed Central journal article supplement (PMC3494205)
Supplement: supp_M112.020594_mcp.M112.020594-4.pdf [file supp_M112.020594_mcp.M112.020594-4.pdf]

**Supplementary Table SIII. Sequence of siRNA oligonucleotides**

| siRNA Oligonucleotides | Sense sequence                                                                            |
|------------------------|-------------------------------------------------------------------------------------------|
| NLRP3                  | AAAGGAAGAAGACGUACACCGCGGU<br>ACCGCGGUGUACGUCUUCUCCUUU<br>UUAGCUUUGGCUUUCACUCAAUCC         |
| AIM2                   | UAUGGUGCUAUGAACUCCAGAUGUC<br>GACAUCUGGAGUUCAUAGCACCAUA<br>AAACCAUUCACAAUUGUCCAAGGG        |
| RIG-I                  | GCACAGAAGUGUAUAUUGG<br>CCACAACACUAGUAAACAA<br>CGGAUUAGCGACAAAUUUA<br>UCGAUGAGAUUGAGCAAGA  |
| EB1                    | CCGAAGAAACCUCUCACUUCUAGCA<br>GGAUCA AUGAGUCUCUGCAGUUGAA<br>UCAACGU AUUGAAACUACUGUUGA      |
| Rac1                   | CCGGUGAAUCUGGGCUUAUGGGUA<br>CCGUGCAAAGUGGUAUCCUGAGGUG<br>CAUGGCUAAGGAGAUUGGUGCUGUA        |
| RhoA                   | CGACAGCCCUGAUAGUUUA<br>GACCAAAGAUGGAGUGAGA<br>GCAGAGAU AUGGCAAACAG<br>GGAAUGAUGAGCACACAAG |
| cdc42                  | CGGAAUAUGUACCGACUGU<br>GCAGUCACAGUUAUGAUUG<br>GAUGACCCCUCUACUAUUG<br>CUGCAGGGCAAGAGGAUUA  |
